# Supplementary material for: Dearomative, aminocatalytic formal normal-electron-demand aza-Diels–Alder cycloaddition in the synthesis of tetrahydrofuropyridines
Source: Royal Society of Chemistry journal article supplement (doi:10.1039/d3cc03946c), 2023-01-01
Supplement: d3cc03946c1.pdf [file d3cc03946c1.pdf]

# Dearomative, aminocatalytic formal normal-electron-demand aza-Diels-Alder cycloaddition in the synthesis of tetrahydrofuropyridines

Mateusz Dyguda,<sup>a</sup> Artur Przydacz,<sup>a</sup> and Łukasz Albrecht<sup>a,\*</sup>

<sup>a</sup> Institute of Organic Chemistry, Faculty of Chemistry, Lodz University of Technology, Żeromskiego 116, 90- 924 Łódź, Poland

e-mail: [lukasz.albrecht@p.lodz.pl](mailto:lukasz.albrecht@p.lodz.pl)

<http://www.a-teamlab.p.lodz.pl>

## Table of contents

|                                                              |     |
|--------------------------------------------------------------|-----|
| 1. General methods                                           | S2  |
| 2. Optimization studies                                      | S3  |
| 3. Scope studies – unsuccessful attempts                     | S3  |
| 4. Organocatalytic synthesis of <b>4</b> – general procedure | S4  |
| 5. X-Ray crystallography of <b>4g</b>                        | S13 |
| 6. Mechanistic studies                                       | S15 |
| 7. NMR spectra                                               | S37 |
| 8. HPLC traces                                               | S51 |

## 1. General methods

NMR spectra were acquired on a Bruker Ultra Shield 700 instrument, running at 700 MHz for  $^1\text{H}$  and 176 MHz for  $^{13}\text{C}$ . Chemical shifts ( $\delta$ ) are reported in ppm relative to residual solvent signals ( $\text{CDCl}_3$ : 7.26 ppm for  $^1\text{H}$  NMR, 77.16 ppm for  $^{13}\text{C}$  NMR). Mass spectra were recorded on a Bruker Maxis Impact spectrometer using chemical ionization (APCI) and electrospray (ESI) referenced to the mass of the charged species. Optical rotations were measured on a Perkin-Elmer 241 polarimeter and  $[\alpha]_D$  values are given in  $\text{deg}\cdot\text{cm}\cdot\text{g}^{-1}\cdot\text{dm}^{-1}$ ; concentration  $c$  is listed in  $\text{g}\cdot(100\text{ mL})^{-1}$ . Analytical thin layer chromatography (TLC) was performed using pre-coated aluminium-backed plates (Merck Kieselgel 60 F254) and visualized by ultraviolet irradiation or Hanessian's stain. The enantiomeric ratio (er) of the products was determined by chiral stationary phase HPLC (Daicel Chiralpak IA, IB, ID columns). Unless otherwise noted, analytical grade solvents and commercially available reagents were used without further purification. For flash chromatography (FC) silica gel (60, 35-70  $\mu\text{m}$ , Merck KGaA) was used. 2-benzyl-3-furfurals **1** and imines **2** were obtained using literature procedures.<sup>1,2</sup> The racemic samples of products **4** for chiral HPLC separation studies were prepared using mixture of (*S*)-(-)- $\alpha,\alpha$ -diphenyl-2-pyrrolidinemethanol trimethylsilyl ether and (*R*)-(+)- $\alpha,\alpha$ -diphenyl-2-pyrrolidinemethanol trimethylsilyl ether C1 under the general reaction condition.

---

<sup>1</sup> J. Bojanowski, A. Skrzyńska and A. Albrecht, *Asian J. Org. Chem.* 2019, **8**, 844.

<sup>2</sup> P. Vicini, A. Geronikaki, M. Incerti, B. Busonera, G. Poni, C. A. Cabras and P. La Colla, *Bioorg. Med. Chem.* 2003, **11**, 4785.

## 2. Optimization studies

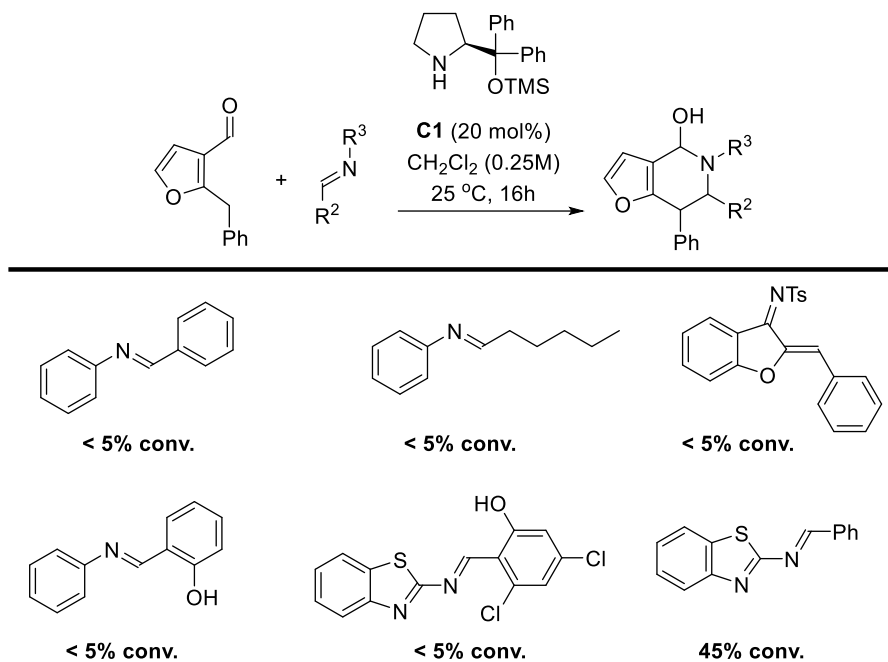

## 3. Scope studies – unsuccessful attempts

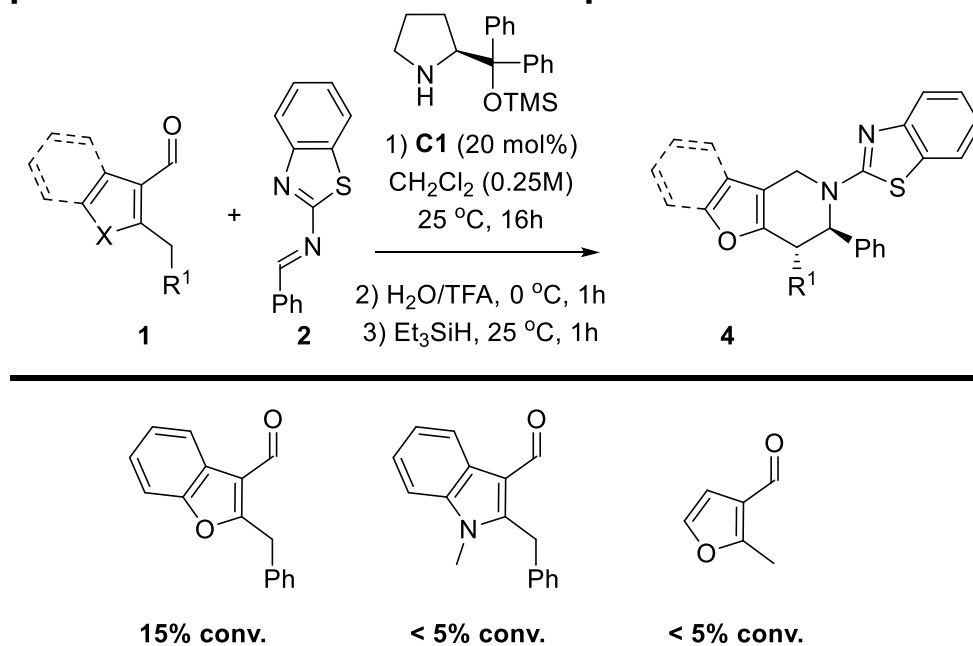

#### 4. Organocatalytic synthesis of 4 – general procedure

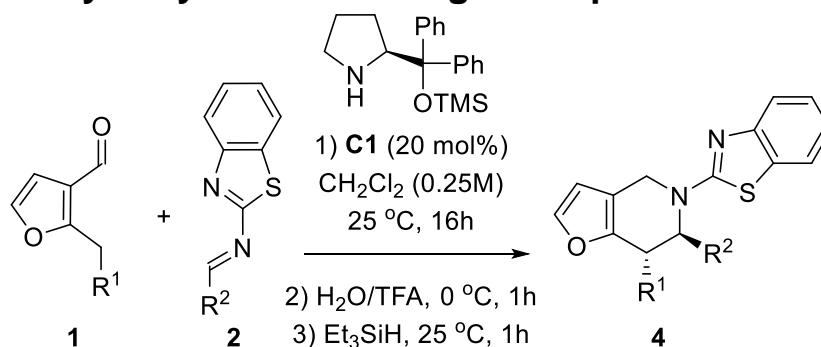

To the mixture of the corresponding 2-alkylfuran-3-carbaldehyde **1** (1 equiv., 0.1 mmol) and (*E*)-*N*-benzylidenebenzo[d]thiazol-2-amine **2** (2.5 equiv., 0.25 mmol) in CH<sub>2</sub>Cl<sub>2</sub> (0.4 mL) (*S*)-(-)- $\alpha,\alpha$ -diphenyl-2-pyrrolidinemethanol trimethylsilyl ether **C1** (3.9 mg, 0.02 mmol) was added and the resulting mixture was stirred at 25 °C for 16 hours. Reaction mixture was then cooled down to 0 °C, H<sub>2</sub>O (5.6 equiv., 0.56 mmol, 10  $\mu$ L) and trifluoroacetic acid (10 equiv., 10 mmol, 76,5  $\mu$ L) were added, and the mixture was stirred at 25 °C for an additional hour. Next, Et<sub>3</sub>SiH (10 equiv., 10 mmol, 156  $\mu$ L) was added and the resulting mixture was stirred at 25 °C for 1 hours. The reaction mixture was then washed with saturated sodium bicarbonate (2 mL), aqueous phase was washed with CH<sub>2</sub>Cl<sub>2</sub> (5 mL), organic phases were combined, dried over Na<sub>2</sub>SO<sub>4</sub>, and concentrated *in vacuo*. The residue was subjected to column chromatography on silica gel (hexanes:ethyl acetate 100:0 to 80:20) to furnish pure compounds **4**.

**(6*R*,7*S*)-5-(Benzo[*d*]thiazol-2-yl)-6,7-diphenyl-4,5,6,7-tetrahydrofuro[3,2-*c*]pyridine 4a**

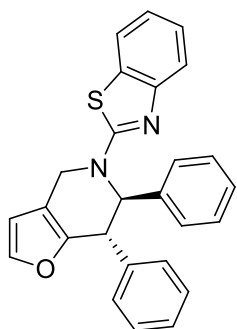

**4a**

Following the general procedure, product **4a** (>20:1 dr in a crude reaction mixture) was isolated in 66% (28,0 mg) yield as a light-yellow oil. <sup>1</sup>H NMR (700 MHz, CDCl<sub>3</sub>) δ 7.60 – 7.57 (m, 2H), 7.50 – 7.47 (m, 1H), 7.44 (dd, *J* = 8.0, 1.2 Hz, 1H), 7.40 (d, *J* = 1.9 Hz, 1H), 7.35 – 7.32 (m, 2H), 7.29 – 7.26 (m, 2H), 7.25 – 7.21 (m, 4H), 7.11 (td, *J* = 7.5, 1.1 Hz, 1H), 7.00 (ddd, *J* = 8.2, 7.3, 1.1 Hz, 1H), 6.33 (d, *J* = 1.9 Hz, 1H), 5.51 (d, *J* = 6.8 Hz, 1H), 4.66 (d, *J* = 6.9 Hz, 1H), 4.32 (d, *J* = 14.4 Hz, 1H), 4.21 (d, *J* = 14.4 Hz, 1H). <sup>13</sup>C NMR (176 MHz, CDCl<sub>3</sub>) δ 168.8, 152.7, 148.3, 143.0, 141.2, 139.1, 130.7, 129.0 (2C), 128.9 (2C), 128.2, 127.7 (2C), 127.5, 126.9 (2C), 126.1, 121.6, 120.8, 119.4, 115.3, 108.1, 67.2, 44.4, 43.2. The er was determined by HPLC using chiral Chiralpack ID column [hexane/*i*-PrOH (90:10)]; flow rate 1.0 mL/min; *T*<sub>minor</sub>=8.3 min; *T*<sub>major</sub>=12.4 min (1:99 er). [ $\alpha$ ]<sub>D</sub><sup>20</sup> = -43.2 (c=1.0, CHCl<sub>3</sub>). HRMS calculated for [C<sub>26</sub>H<sub>20</sub>N<sub>2</sub>OS+H<sup>+</sup>]: 409.1369; found: 409.1370.

**(6*R*,7*S*)-5-(Benzo[*d*]thiazol-2-yl)-6-(3-fluorophenyl)-7-phenyl-4,5,6,7-tetrahydrofuro[3,2-*c*]pyridine 4b**

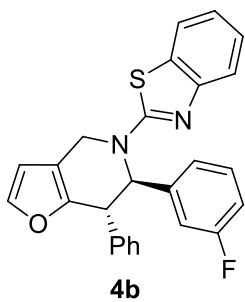

**4b**

Following the general procedure, product **4b** (10:1 dr in a crude reaction mixture) was isolated in 69% (29.4 mg) yield as a light-yellow oil. <sup>1</sup>H NMR (700 MHz, CDCl<sub>3</sub>) δ 7.55 (ddd, *J* = 9.4, 8.0, 1.3 Hz, 2H), 7.41 (d, *J* = 1.9 Hz, 1H), 7.32 – 7.26 (m, 4H), 7.26 – 7.20 (m, 3H), 7.13 (ddt, *J* = 7.8, 1.7, 0.8 Hz, 1H), 7.09 – 7.04 (m, 1H), 7.04 – 7.01 (m, 1H), 6.97 (tdd, *J* = 8.4, 2.5, 1.0 Hz, 1H), 6.38 (d, *J* = 2.0 Hz, 1H), 5.65 (s, 1H), 5.14 (d, *J* = 15.7 Hz, 1H), 4.61 (s, 1H), 4.27 (dd, *J* = 15.7, 1.7 Hz, 1H). <sup>13</sup>C NMR (176 MHz, CDCl<sub>3</sub>) δ 168.6, 163. (d, *J* = 246.7 Hz), 152.6, 148.1, 143.2, 141.7 (d, *J* = 6.4 Hz), 140.9, 130.7, 130.4 (d, *J* = 8.1 Hz), 129.0 (2C), 127.6 (2C), 126.2, 122.7 (d, *J* = 3.1 Hz), 121.8, 120.2 (d, *J* = 221.9 Hz), 115.2 (d, *J* = 21.0 Hz), 115.1, 114.0 (d, *J* = 22.2 Hz), 108.1, 66.2, 44.4, 43.4. <sup>19</sup>F NMR (376 MHz, CDCl<sub>3</sub>) δ -111.70 (td, *J* = 9.2, 5.8 Hz). The er was determined by HPLC using a chiral Chiralpack ID column [hexane/*i*-PrOH (90:10)]; flow rate 1.0 mL/min; *T*<sub>minor</sub>=7.5 min; *T*<sub>major</sub>=9.2 min (2:98 er). [ $\alpha$ ]<sub>D</sub><sup>20</sup> = -9.6 (c=1.0, CHCl<sub>3</sub>). HRMS calculated for [C<sub>26</sub>H<sub>19</sub>FN<sub>2</sub>OS+H<sup>+</sup>]: 427.1275; found: 427.1278

**(6*R*,7*S*)-5-(Benzo[*d*]thiazol-2-yl)-6-(4-bromophenyl)-7-phenyl-4,5,6,7-tetrahydrofuro[3,2-*c*]pyridine 4c**

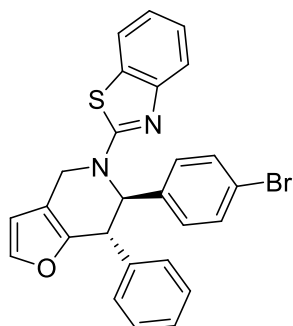

**4c**

Following the general procedure, product **4c** (>20:1 dr in a crude reaction mixture) was isolated in 75% (36.7 mg) yield as a light-yellow oil. <sup>1</sup>H NMR (700 MHz, CDCl<sub>3</sub>) δ 7.58 (d, *J* = 8.1 Hz, 1H), 7.52 (dd, *J* = 7.9, 1.2 Hz, 1H), 7.43 – 7.39 (m, 3H), 7.32 – 7.27 (m, 3H), 7.25 – 7.19 (m, 5H), 7.07 (td, *J* = 7.6, 1.1 Hz, 1H), 6.37 (d, *J* = 2.0 Hz, 1H), 5.61 (s, 1H), 5.14 (d, *J* = 15.7 Hz, 1H), 4.60 (s, 1H), 4.22 (dd, *J* = 15.7, 1.7 Hz, 1H). <sup>13</sup>C NMR (176 MHz, CDCl<sub>3</sub>) δ 168.6, 152.6, 148.1, 143.2, 140.9, 138.1, 132.0 (2C), 130.7, 129.0 (2C), 128.7 (2C), 127.6 (2C), 126.2, 122.2, 121.8, 120.8, 119.5, 115.1, 108.1, 66.0, 44.3, 43.3. The er was determined by HPLC using a chiral Chiralpack ID column [hexane/*i*-PrOH (90:10)]; flow rate 1.0 mL/min; *T*<sub>minor</sub>=7.7 min; *T*<sub>major</sub>=12.3 min (95:5 er). [ $\alpha$ ]<sub>D</sub><sup>20</sup> = -53.8 (c=1.0, CHCl<sub>3</sub>). HRMS calculated for [C<sub>26</sub>H<sub>19</sub>BrN<sub>2</sub>OS+H<sup>+</sup>]: 487.0474; found: 487.0473.

**(6*R*,7*S*)-5-(Benzo[*d*]thiazol-2-yl)-6-(2,4-dichlorophenyl)-7-phenyl-4,5,6,7-tetrahydrofuro[3,2-*c*]pyridine 4d**

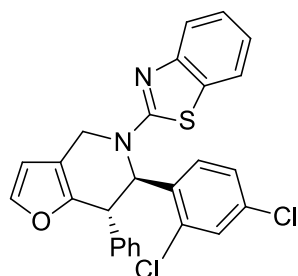

**4d**

Following the general procedure, product **4d** (15:1 dr in a crude reaction mixture) was isolated in 68% (29.3 mg) yield as a light-yellow oil. <sup>1</sup>H NMR (700 MHz, CDCl<sub>3</sub>) δ 7.60 (d, *J* = 8.1 Hz, 1H), 7.50 (dd, *J* = 8.0, 1.2 Hz, 1H), 7.46 (d, *J* = 2.2 Hz, 1H), 7.38 (d, *J* = 2.0 Hz, 1H), 7.32 – 7.27 (m, 3H), 7.26 – 7.22 (m, 3H), 7.09 (dd, *J* = 8.5, 2.2 Hz, 1H), 7.08 – 7.03 (m, 1H), 6.97 (d, *J* = 8.5 Hz, 1H), 6.48 (d, *J* = 1.9 Hz, 1H), 5.70 (s, 1H), 5.29 (d, *J* = 16.0 Hz, 1H), 4.97 (dd, *J* = 16.0, 1.3 Hz, 1H), 4.40 (s, 1H). <sup>13</sup>C NMR (176 MHz, CDCl<sub>3</sub>) δ 168.0, 147.1, 143.4, 140.8, 138.1, 134.4, 133.8, 129.8, 129.1 (2C), 127.9, 127.8, 127.8, 127.3 (2C), 126.2, 122.0, 120.8, 119.6, 114.0, 108.2, 64.8, 46.3, 45.6. The er was determined by HPLC using a chiral Chiralpack IB column [hexane/*i*-PrOH (90:10)]; flow rate 1.0 mL/min; *T*<sub>minor</sub>=7.1 min; *T*<sub>major</sub>=11.3 min (2:98 er). [ $\alpha$ ]<sub>D</sub><sup>20</sup> = -29.0 (c=1.0, CHCl<sub>3</sub>). HRMS calculated for [C<sub>26</sub>H<sub>18</sub>Cl<sub>2</sub>N<sub>2</sub>OS+H<sup>+</sup>]: 478.4123; found: 478.4131.

**(6*R*,7*S*)-5-(Benzo[*d*]thiazol-2-yl)-6-(4-nitrophenyl)-7-phenyl-4,5,6,7-tetrahydrofuro[3,2-*c*]pyridine 4e**

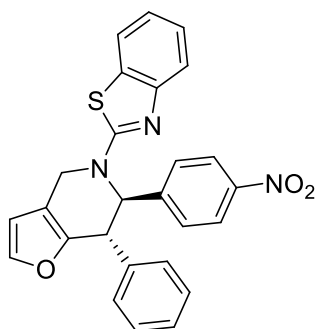

**4e**

Following the general procedure, product **4e** (10:1 dr in a crude reaction mixture) was isolated in 66% (30.1 mg) yield as a light-yellow oil. <sup>1</sup>H NMR (700 MHz, CDCl<sub>3</sub>) δ 8.16 – 8.12 (m, 2H), 7.58 – 7.54 (m, 2H), 7.51 (d, *J* = 8.9 Hz, 2H), 7.43 (d, *J* = 2.0 Hz, 1H), 7.33 – 7.28 (m, 3H), 7.27 – 7.21 (m, 4H), 6.39 (d, *J* = 2.0 Hz, 1H), 5.91 (s, 1H), 5.06 (d, *J* = 15.6 Hz, 1H), 4.63 (s, 1H), 4.25 (dd, *J* = 15.5, 1.7 Hz, 1H). <sup>13</sup>C NMR (176 MHz, CDCl<sub>3</sub>) δ 168.3, 152.4, 147.8, 147.7, 146.5, 143.5, 140.4, 130.7, 129.1 (2C), 128.0 (2C), 127.8, 127.6 (2C), 126.3, 124.1 (2C), 122.0, 120.9, 119.7, 115.0, 108.1, 65.2, 44.2, 43.7. The er was determined by HPLC using a chiral Chiralpack IB column [hexane/*i*-PrOH (90:10)]; flow rate 1.0 mL/min; *T*<sub>major</sub>=9.8 min; *T*<sub>minor</sub>=10.9 min (15:85 er). [ $\alpha$ ]<sub>D</sub><sup>20</sup> = –23.3 (c=1.0, CHCl<sub>3</sub>). HRMS calculated for [C<sub>26</sub>H<sub>19</sub>N<sub>3</sub>O<sub>3</sub>S+H<sup>+</sup>]: 454.1219; found: 454.1211.

**(6*R*,7*S*)-5-(Benzo[*d*]thiazol-2-yl)-6-(3-methoxyphenyl)-7-phenyl-4,5,6,7-tetrahydrofuro[3,2-*c*]pyridine 4f**

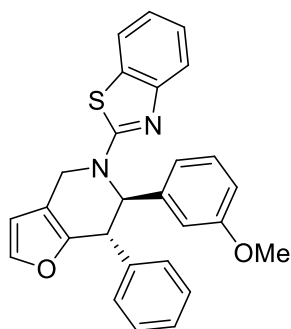

**4f**

Following the general procedure, product **4f** (10:1 dr in a crude reaction mixture) was isolated in 72% (31.6 mg) yield as a light-yellow oil. <sup>1</sup>H NMR (700 MHz, CDCl<sub>3</sub>) δ 7.56 – 7.54 (m, 1H), 7.53 – 7.50 (m, 1H), 7.40 (d, *J* = 1.9 Hz, 1H), 7.30 – 7.26 (m, 3H), 7.24 – 7.19 (m, 4H), 7.07 – 7.03 (m, 1H), 6.91 (ddt, *J* = 7.8, 1.7, 0.8 Hz, 1H), 6.89 (t, *J* = 2.2 Hz, 1H), 6.81 (ddd, *J* = 8.2, 2.5, 0.9 Hz, 1H), 6.37 (d, *J* = 1.9 Hz, 1H), 5.55 (s, 1H), 5.19 (d, *J* = 15.6 Hz, 1H), 4.62 (s, 1H), 4.30 (dd, *J* = 15.7, 1.8 Hz, 1H), 3.72 (s, 3H). <sup>13</sup>C NMR (176 MHz, CDCl<sub>3</sub>) δ 168.8, 159.9, 152.7, 148.3, 143.0, 141.2, 140.7, 130.7, 129.9, 129.0 (2C), 127.6 (2C), 127.5, 126.1, 121.6, 120.7, 119.4, 119.2, 115.16, 113.1 (2C), 108.1, 67.0, 55.3, 44.6, 43.4. The er was determined by HPLC using a chiral Chiralpack ID column [hexane/*i*-PrOH (85:15)]; flow rate 1.0 mL/min; *T*<sub>minor</sub>=10.9 min; *T*<sub>major</sub>=15.2 min (1:99 er). [ $\alpha$ ]<sub>D</sub><sup>20</sup> = –19.1 (c=1.0, CHCl<sub>3</sub>). HRMS calculated for [C<sub>27</sub>H<sub>22</sub>N<sub>2</sub>O<sub>2</sub>S+H<sup>+</sup>]: 439.1474; found: 439.1471.

**(6*R*,7*S*)-5-(Benzo[*d*]thiazol-2-yl)-6-(2-methoxyphenyl)-7-phenyl-4,5,6,7-tetrahydrofuro[3,2-*c*]pyridine 4g**

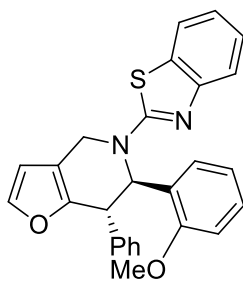

**4g**

Following the general procedure, product **4g** (15:1 dr in a crude reaction mixture) was isolated in 68% (29.3 mg) yield as a light-green oil. <sup>1</sup>H NMR (700 MHz, CDCl<sub>3</sub>) δ 7.58 – 7.54 (m, 1H), 7.45 (ddd, *J* = 7.8, 1.3, 0.5 Hz, 1H), 7.36 (d, *J* = 1.9 Hz, 1H), 7.29 (tt, *J* = 6.6, 1.3 Hz, 2H), 7.26 – 7.20 (m, 5H), 7.02 – 6.98 (m, 2H), 6.94 (dd, *J* = 8.2, 1.1 Hz, 1H), 6.81 (td, *J* = 7.5, 1.1 Hz, 1H), 6.45 – 6.43 (m, 1H), 5.61 (s, 1H), 5.36 (d, *J* = 16.0 Hz, 1H), 4.80 (dd, *J* = 16.1, 1.4 Hz, 1H), 4.51 (s, 1H), 3.96 (s, 3H). <sup>13</sup>C NMR (176 MHz, CDCl<sub>3</sub>) δ 168.9, 156.8, 152.5, 147.9, 142.9, 141.8, 131.0, 129.3, 129.0, 128.9 (2C), 127.5 (2C), 127.4, 126.2, 125.9, 121.4, 120.8, 120.6, 119.2, 114.6, 110.5, 108.2, 63.6, 55.6, 45.4, 45.3. The er was determined by HPLC using a chiral Chiralpack IA column [hexane/*i*-PrOH (90:10)]; flow rate 1.0 mL/min; *T*<sub>minor</sub>=11.0 min; *T*<sub>major</sub>=26.4 min (1:99 er).  $[\alpha]_D^{20} = -27.5$  (c=1.0, CHCl<sub>3</sub>). HRMS calculated for [C<sub>27</sub>H<sub>22</sub>N<sub>2</sub>O<sub>2</sub>S+H<sup>+</sup>]: 439.1474; found: 439.1471.

**(6*R*,7*S*)-5-(Benzo[*d*]thiazol-2-yl)-6-(naphthalen-2-yl)-7-phenyl-4,5,6,7-tetrahydrofuro[3,2-*c*]pyridine 4h**

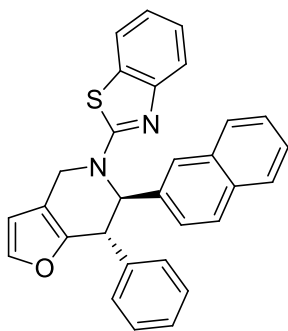

**4h**

Following the general procedure, product **4h** (>20:1 dr in a crude reaction mixture) was isolated in 64% (29,2 mg) yield as a light-yellow oil. <sup>1</sup>H NMR (700 MHz, CDCl<sub>3</sub>) δ 7.79 – 7.72 (m, 4H), 7.56 (dd, *J* = 8.2, 1.1 Hz, 1H), 7.52 (dd, *J* = 7.9, 1.2 Hz, 1H), 7.49 – 7.44 (m, 3H), 7.41 (d, *J* = 2.0 Hz, 1H), 7.32 – 7.27 (m, 4H), 7.26 – 7.23 (m, 2H), 7.04 – 7.07 (m, 1H), 6.36 (d, *J* = 2.0 Hz, 1H), 5.74 (s, 1H), 5.23 (d, *J* = 15.8 Hz, 1H), 4.81 (s, 1H), 4.28 (dd, *J* = 15.8, 1.7 Hz, 1H). <sup>13</sup>C NMR (176 MHz, CDCl<sub>3</sub>) δ 168.9, 152.7, 148.3, 143.1, 141.2, 136.5, 133.3, 133.1, 130.8, 129.0 (2C), 128.8, 128.4, 127.7 (2C), 127.7, 127.6, 126.5, 126.4, 126.1, 125.7, 125.0, 121.6, 120.8, 119.4, 115.3, 108.1, 67.2, 44.4, 43.4. The er was determined by HPLC using a chiral Chiralpack ID column [hexane/*i*-PrOH (90:10)]; flow rate 1.0 mL/min; *T*<sub>minor</sub>=9.2 min; *T*<sub>major</sub>=16.6 min (2:98 er).  $[\alpha]_D^{20} = -23.7$  (c=1.0, CHCl<sub>3</sub>). HRMS calculated for [C<sub>30</sub>H<sub>22</sub>N<sub>2</sub>OS+H<sup>+</sup>]: 459.1525; found: 459.1524.



**(6*R*,7*S*)-5-(Benzo[*d*]thiazol-2-yl)-6-(furan-2-yl)-7-phenyl-4,5,6,7-tetrahydrofuro[3,2-*c*]pyridine 4i**

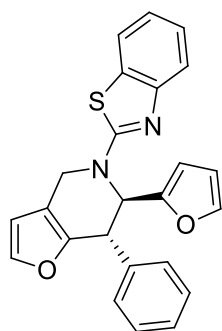

**4i**

Following the general procedure, product **4i** (18:1 dr in a crude reaction mixture) was isolated in 73% (29.1 mg) yield as a light-yellow oil. <sup>1</sup>H NMR (700 MHz, CDCl<sub>3</sub>) δ 7.57 (dd, *J* = 8.2, 1.1 Hz, 1H), 7.54 (dd, *J* = 7.8, 1.2 Hz, 1H), 7.37 (d, *J* = 1.9 Hz, 1H), 7.32 (d, *J* = 1.8 Hz, 1H), 7.31 – 7.27 (m, 3H), 7.23 (ddt, *J* = 6.7, 4.0, 1.8 Hz, 3H), 7.07 (td, *J* = 7.6, 1.2 Hz, 1H), 6.35 (d, *J* = 1.9 Hz, 1H), 6.27 (dd, *J* = 3.3, 1.8 Hz, 1H), 6.14 (dt, *J* = 3.4, 1.0 Hz, 1H), 5.60 (s, 1H), 5.13 (d, *J* = 15.3 Hz, 1H), 4.69 (s, 1H), 4.30 (dd, *J* = 15.4, 1.8 Hz, 1H). <sup>13</sup>C NMR (176 MHz, CDCl<sub>3</sub>) δ 168.9, 152.5, 151.7, 148.0, 142.9, 142.3, 140.4, 130.9, 128.9, 127.7, 127.6, 126.1, 121.8, 120.8, 119.6, 114.7, 110.5, 108.1, 107.2, 62.0, 43.5, 43.4. The er was determined by HPLC using a chiral Chiralpack ID column [hexane/*i*-PrOH (90:10)]; flow rate 1.0 mL/min; *T*<sub>minor</sub>=7.4 min; *T*<sub>major</sub>=11.0 min (3:97 er).  $[\alpha]_D^{20} = -11.4$  (*c*=1.0, CHCl<sub>3</sub>). HRMS calculated for [C<sub>24</sub>H<sub>18</sub>N<sub>2</sub>O<sub>2</sub>S+H<sup>+</sup>]: 399.1161; found: 399.1163

**(6*R*,7*S*)-5-(6-Fluorobenzo[*d*]thiazol-2-yl)-6,7-diphenyl-4,5,6,7-tetrahydrofuro[3,2-*c*]pyridine 4j**

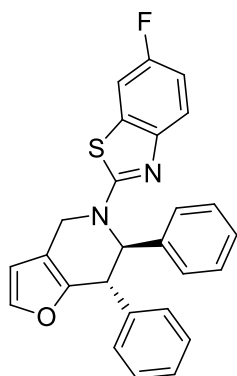

**4j**

Following the general procedure, product **4j** (10:1 dr in a crude reaction mixture) was isolated in 94% (40.0 mg) yield as a light-yellow oil<sup>1</sup>. <sup>1</sup>H NMR (700 MHz, CDCl<sub>3</sub>) δ 7.45 (dd, *J* = 8.8, 4.7 Hz, 1H), 7.40 (d, *J* = 1.9 Hz, 1H), 7.35 – 7.27 (m, 7H), 7.25 – 7.19 (m, 4H), 7.00 (td, *J* = 9.0, 2.6 Hz, 1H), 6.37 (d, *J* = 1.9 Hz, 1H), 5.52 (s, 1H), 5.15 (d, *J* = 15.6 Hz, 1H), 4.65 (s, 1H), 4.24 (dd, *J* = 15.7, 1.7 Hz, 1H). <sup>13</sup>C NMR (176 MHz, CDCl<sub>3</sub>) δ 168.3, 158.3 (d, *J* = 240.3 Hz), 149.1 (d, *J* = 1.9 Hz), 148.2, 143.1, 141.2, 139.0, 131.4 (d, *J* = 10.8 Hz), 129.0 (2C), 129.0 (2C), 128.3, 127.7 (2C), 127.6, 126.8 (2C), 119.8 (d, *J* = 8.6 Hz), 115.2, 113.7 (d, *J* = 23.6 Hz), 108.1, 107.5 (d, *J* = 26.8 Hz), 67.2, 44.4, 43.3. <sup>19</sup>F NMR (376 MHz, CDCl<sub>3</sub>) δ -121.07. The er was determined by HPLC using a chiral Chiralpack ID column [hexane/*i*-PrOH (90:10)]; flow rate 1.0 mL/min; *T*<sub>minor</sub>=7.2 min; *T*<sub>major</sub>=9.0 min (1:99 er).  $[\alpha]_D^{20} = -33.7$  (*c*=1.0, CHCl<sub>3</sub>). HRMS calculated for [C<sub>26</sub>H<sub>19</sub>FN<sub>2</sub>OS+H<sup>+</sup>]: 427.1275; found: 427.1278.

**(6*R*,7*S*)-5-(Benzo[*d*]thiazol-2-yl)-7-(3-methoxyphenyl)-6-phenyl-4,5,6,7-tetrahydrofuro[3,2-*c*]pyridine 4k**

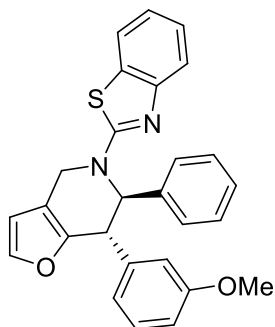

**4**

Following the general procedure, product **4k** (15:1 dr in a crude reaction mixture) in 58% (25.6 mg) yield as a light-yellow oil. <sup>1</sup>H NMR (700 MHz, CDCl<sub>3</sub>) δ 7.57 – 7.51 (m, 2H), 7.40 (d, J = 1.9 Hz, 1H), 7.34 – 7.31 (m, 2H), 7.30 – 7.26 (m, 4H), 7.22 – 7.18 (m, 1H), 7.06 (td, J = 7.6, 1.2 Hz, 1H), 6.83 (dt, J = 7.7, 1.3 Hz, 1H), 6.78 – 6.76 (m, 2H), 6.36 (d, J = 2.0 Hz, 1H), 5.62 (s, 1H), 5.17 (d, J = 15.7 Hz, 1H), 4.62 (s, 1H), 4.24 (dd, J = 15.7, 1.8 Hz, 1H), 3.69 (s, 3H). <sup>13</sup>C NMR (176 MHz, CDCl<sub>3</sub>) δ 168.8, 160.0, 152.7, 148.3, 143.0, 142.8, 139.1, 130.7, 130.0, 128.9 (2C), 128.2, 126.9 (2C), 126.1, 121.6, 120.8, 120.1, 119.4, 115.2, 113.5, 112.9, 108.1, 66.8, 55.3, 44.3, 43.2. The er was determined by HPLC using a chiral Chiralpack ID column [hexane/*i*-PrOH (90:10)]; flow rate 1.0 mL/min; T<sub>minor</sub>=10.5 min; T<sub>major</sub>=18.5 min (1:99 er). [α]<sub>D</sub><sup>20</sup> = –55.1 (c=1.0, CHCl<sub>3</sub>). HRMS calculated for [C<sub>27</sub>H<sub>22</sub>N<sub>2</sub>O<sub>2</sub>S+H<sup>+</sup>]: 439.1474; found: 439.1471.

## Wittig olefination

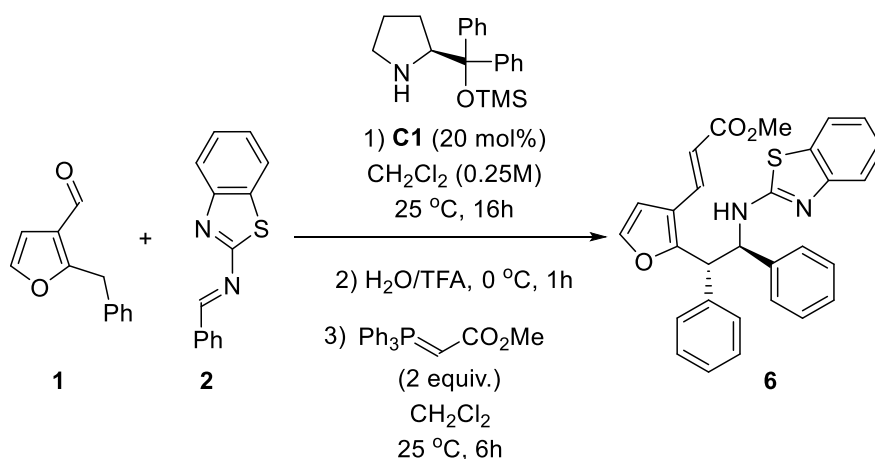

To the mixture of 2-benzylfuran-3-carbaldehyde **1a** (1 equiv., 0.1 mmol) and (*E*)-*N*-benzylidenebenzo[*d*]thiazol-2-amine **2a** (2 equiv., 0.2 mmol) in  $\text{CH}_2\text{Cl}_2$  (0.4 mL) (*S*)-(-)- $\alpha,\alpha$ -diphenyl-2-pyrrolidinemethanol trimethylsilyl ether **C1** (3.9 mg, 0.02 mmol) was added and the resulting mixture was stirred at  $25^\circ\text{C}$  for 16 hours. Reaction mixture was then cooled down to  $0^\circ\text{C}$ ,  $\text{H}_2\text{O}$  (5.6 equiv., 0.56 mmol,  $10\mu\text{L}$ ) and trifluoroacetic acid (10 equiv., 10 mmol,  $76.5\mu\text{L}$ ) were added, and the mixture was stirred at  $25^\circ\text{C}$  for an additional hour. Afterwards, the reaction mixture was washed with saturated  $\text{NaHCO}_3$  solution, dried over  $\text{Na}_2\text{SO}_4$ , filtered and concentrated *in vacuo*. The residue was dissolved in  $\text{CH}_2\text{Cl}_2$  (0.4 mL), (carbethoxymethylene)triphenylphosphorane (2 equiv., 0.2 mmol) was added and the resulting mixture was stirred at  $25^\circ\text{C}$  for 6 hours. The reaction mixture was directly subjected to column chromatography on silica gel (hexanes:ethyl acetate 100:0 to 80:20) to furnish pure compound **6**.

### (*E*)-Methyl 3-(2-((1*S*,2*R*)-2-(benzo[*d*]thiazol-2-ylamino)-1,2-diphenylethyl)furan-3-yl)acrylate **6**

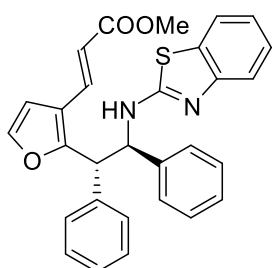

Product **6** (20:1 dr in a crude reaction mixture) was isolated in 55% (26.5 mg) yield as a light-yellow oil.  $^1\text{H}$  NMR (700 MHz,  $\text{CDCl}_3$ )  $\delta$  7.49 (td,  $J = 8.0, 1.2$  Hz, 2H), 7.44 (d,  $J = 2.0$  Hz, 1H), 7.34 (d,  $J = 15.6$  Hz, 1H), 7.28 – 7.15 (m, 11H), 7.03 (ddd,  $J = 8.2, 7.4, 1.2$  Hz, 1H), 6.50 (d,  $J = 2.0$  Hz, 1H), 6.23 (s, 1H), 6.03 (d,  $J = 15.6$  Hz, 1H), 5.39 (d,  $J = 7.2$  Hz, 1H), 4.66 (d,  $J = 7.2$  Hz, 1H), 3.76 (s, 3H).  $^{13}\text{C}$  NMR (176 MHz,  $\text{CDCl}_3$ )  $\delta$  167.4, 166.7, 154.1, 152.0, 143.4, 139.4, 137.7, 133.7, 130.9, 128.8 (2C), 128.6 (2C), 128.5 (2C), 128.1, 127.6, 127.0 (2C), 126.0, 121.7, 120.9, 120.6, 119.2, 118.0, 108.2, 63.3, 51.7, 49.8. The er was determined by HPLC

using a chiral Chiralpack IC column [hexane/*i*-PrOH (90:10)]; flow rate 1.0 mL/min;  $\tau_{\text{minor}}=5.3$  min;  $\tau_{\text{major}}=6.1$  min (1:99 er).  $[\alpha]_D^{20} = -41.1$  (c=1.0, CHCl<sub>3</sub>). HRMS calculated for [C<sub>29</sub>H<sub>24</sub>N<sub>2</sub>O<sub>3</sub>S+H<sup>+</sup>]: 481.1580; found: 481.1579.

## 5. X-Ray crystallography of 4g

The crystal structure of the compound **4g**,  $C_{27}H_{22}N_2O_2S$ , was established by single-crystal X-ray diffraction at 100 K. The compound crystallizes in the non-centrosymmetric monoclinic space group  $P2_1$  ( $Z = 4$ ), with two crystallographically independent formula units per unit cell (Figure 1).

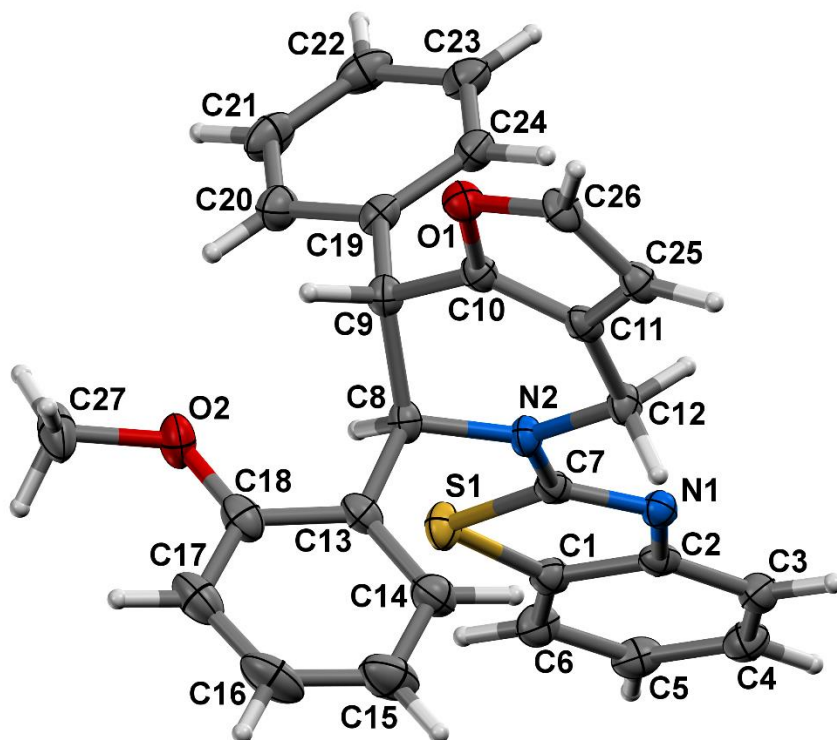

Figure 1. The molecular structure of the compound 4f at 100 K, showing 50% probability displacement ellipsoids. One of two independent molecules is shown. Hydrogen atoms are drawn with an arbitrary radius.

Single crystal X-ray diffraction data were collected at 100 K by the  $\omega$ -scan technique using a RIGAKU XtaLAB Synergy, Dualflex, Pilatus 300K diffractometer<sup>3</sup> with PhotonJet micro-focus X-ray Source Cu-K $\alpha$  ( $\lambda = 1.54184 \text{ \AA}$ ). Data collection, cell refinement, data reduction and absorption correction were performed using CrysAlis PRO software. The crystal structure was solved using direct methods and the SHELXT 2018/2 program<sup>4</sup> with atomic scattering factors taken from the International Tables for X-ray Crystallography. Positional parameters of non-H-atoms were refined by a full-matrix least-squares method on  $F^2$  with anisotropic thermal parameters by using the

<sup>3</sup> Rigaku OD. CrysAlis PRO. Rigaku Oxford Diffraction Ltd, Yarnton, Oxfordshire, England, 2019

<sup>4</sup> G.M. Sheldrick, *Acta Cryst.* 2015, **A71**, 3.

SHELXL 2019/2 program<sup>5</sup>. All hydrogen atoms were found from the difference Fourier maps and for further calculations they were positioned geometrically in calculated positions (C–H = 0.95–1.00 Å) and constrained to ride on their parent atoms with isotropic displacement parameters set to 1.2–1.5 times the  $U_{eq}$  of the parent atom.

4f: Formula  $C_{27}H_{22}N_2O_2S$ , monoclinic, space group  $P2_1$ ,  $Z = 4$ , unit cell constants  $a = 9.3277(1)$ ,  $b = 26.9016(1)$ ,  $c = 9.3909(1)$  Å,  $\beta = 107.691(1)^\circ$ ,  $V = 2245.02(4)$  Å<sup>3</sup>. The integration of the data yielded a total of 112889 reflections with  $\theta$  angles in the range of 3.29 to 67.74°, of which 8120 were unique ( $R_{int} = 2.90\%$ ). The final anisotropic full-matrix least-squares refinement on  $F^2$  with 580 parameters. The final  $R_1$  was 0.0222 (for  $I > 2\sigma(I)$ ) and  $wR_2$  was 0.0600 (all data). The largest peak in the final difference electron density synthesis was 0.197 eÅ<sup>-3</sup> and the largest hole was -0.159 eÅ<sup>-3</sup>. The goodness-of-fit was 1.034. The absolute configuration was unambiguously established from anomalous scattering, by calculating the  $x$  Flack parameter<sup>6</sup> of 0.005(4) using 3911 quotients.

CCDC 2265527 contains the supplementary crystallographic data for this paper. These data can be obtained free of charge from The Cambridge Crystallographic Data Centre via [www.ccdc.cam.ac.uk/structures](http://www.ccdc.cam.ac.uk/structures)

---

<sup>5</sup> G.M. Sheldrick *Acta Cryst.* 2015, **C71**, 3.

<sup>6</sup> S. Parsons; H.D. Flack, T. Wagner *Acta Cryst.* 2013, **B69**, 249.

## 6. Mechanistic studies

### 6.1. HRMS experiments of a reaction mixture

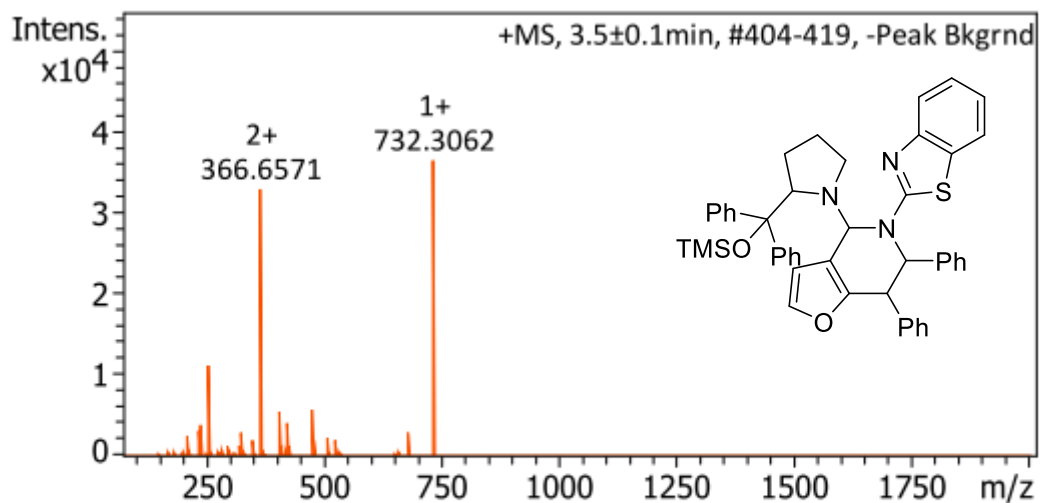

| #  | m/z      | Res.  | S/N   | I     | I %   | FWHM   | z  |
|----|----------|-------|-------|-------|-------|--------|----|
| 1  | 213.1460 | 26167 | 106.8 | 2478  | 6.8   | 0.0081 |    |
| 2  | 236.1435 | 28991 | 128.3 | 3181  | 8.7   | 0.0081 | 1+ |
| 3  | 239.0634 | 27650 | 155.2 | 3891  | 10.7  | 0.0086 | 1+ |
| 4  | 255.1195 | 27101 | 427.6 | 11270 | 30.9  | 0.0094 | 1+ |
| 5  | 256.1221 | 26356 | 80.4  | 2126  | 5.8   | 0.0097 | 1+ |
| 6  | 326.3776 | 32007 | 88.3  | 2900  | 7.9   | 0.0102 | 1+ |
| 7  | 366.6571 | 30791 | 901.9 | 33001 | 90.4  | 0.0119 | 2+ |
| 8  | 367.1584 | 32285 | 520.0 | 19054 | 52.2  | 0.0114 | 2+ |
| 9  | 367.6590 | 27481 | 206.3 | 7570  | 20.7  | 0.0134 | 2+ |
| 10 | 368.1593 | 28632 | 66.1  | 2428  | 6.6   | 0.0129 | 2+ |
| 11 | 407.1206 | 33766 | 136.4 | 5504  | 15.1  | 0.0121 | 1+ |
| 12 | 409.1358 | 30103 | 63.0  | 2553  | 7.0   | 0.0136 | 1+ |
| 13 | 425.1314 | 33543 | 99.9  | 4187  | 11.5  | 0.0127 | 1+ |
| 14 | 478.1945 | 33839 | 127.1 | 5880  | 16.1  | 0.0141 | 1+ |
| 15 | 510.2450 | 33132 | 46.0  | 2258  | 6.2   | 0.0154 | 1+ |
| 16 | 680.3191 | 38154 | 46.4  | 2835  | 7.8   | 0.0178 | 1+ |
| 17 | 732.3062 | 35950 | 573.2 | 36508 | 100.0 | 0.0204 | 1+ |
| 18 | 733.3090 | 36080 | 319.5 | 20360 | 55.8  | 0.0203 | 1+ |
| 19 | 734.3107 | 29089 | 124.5 | 7936  | 21.7  | 0.0252 | 1+ |
| 20 | 735.3116 | 28906 | 40.4  | 2576  | 7.1   | 0.0254 | 1+ |

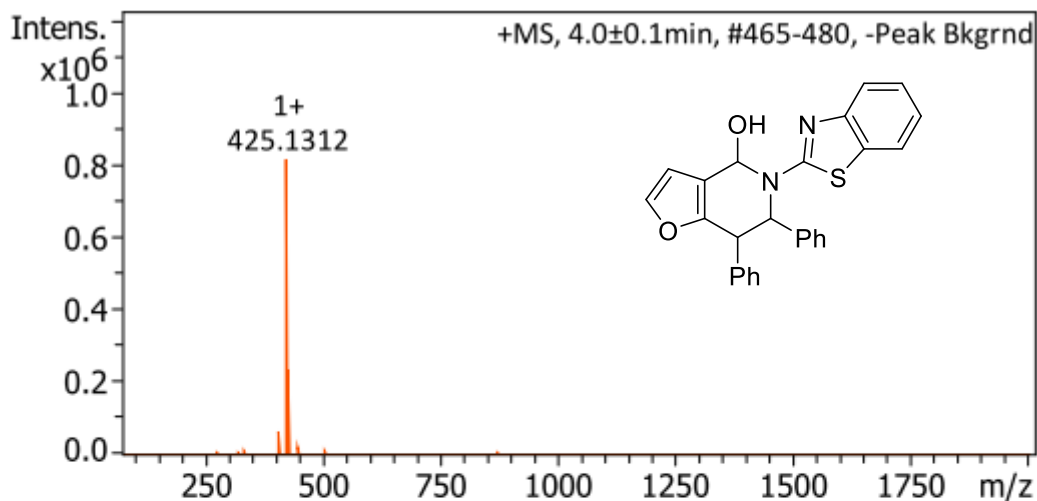

| #  | m/z      | Res.  | S/N     | I      | I %   | FWHM   | z  |
|----|----------|-------|---------|--------|-------|--------|----|
| 1  | 249.1090 | 28485 | 142.6   | 2399   | 0.3   | 0.0087 |    |
| 2  | 275.1060 | 27849 | 304.4   | 5406   | 0.7   | 0.0099 | 1+ |
| 3  | 292.2230 | 33036 | 170.3   | 3172   | 0.4   | 0.0088 |    |
| 4  | 294.2425 | 29083 | 124.9   | 2338   | 0.3   | 0.0101 |    |
| 5  | 320.2541 | 32646 | 340.6   | 6756   | 0.8   | 0.0098 | 1+ |
| 6  | 334.2346 | 29814 | 540.6   | 11056  | 1.4   | 0.0112 | 1+ |
| 7  | 407.1205 | 31079 | 2926.2  | 68116  | 8.4   | 0.0131 | 1+ |
| 8  | 408.1236 | 31029 | 819.3   | 19098  | 2.3   | 0.0132 | 1+ |
| 9  | 409.1211 | 20831 | 171.9   | 4013   | 0.5   | 0.0196 | 1+ |
| 10 | 425.1312 | 30540 | 33935.7 | 815264 | 100.0 | 0.0139 | 1+ |
| 11 | 426.1343 | 30227 | 9751.7  | 234474 | 28.8  | 0.0141 | 1+ |
| 12 | 427.1323 | 19740 | 2078.8  | 50040  | 6.1   | 0.0216 | 1+ |



## 6.2. Computational data

All DFT calculations were carried out using ORCA 5.0 package<sup>7</sup>. Visualization of calculated structures were done using ChemCraft (v. b648b) graphical software. All calculations utilized RIJCOSX approximation with def2/J<sup>8</sup>, auxiliary basis set and included PCM solvation model<sup>9</sup> to account for the effects exerted by CH<sub>2</sub>Cl<sub>2</sub>. The ground-state structures of minima and transition states were found assuming the  $\omega$ B97X-D3 long-range corrected hybrid functional<sup>10</sup> and the def2-SVP basis set.<sup>11</sup> The harmonic vibrational frequencies were computed for located structures at the same level of theory to confirm the character of the located stationary points. For each located transition state intrinsic reaction coordinate (IRC) analysis was performed to confirm the connection between reactants and products. Single-point energy calculations were performed assuming DSD-BLYP double hybrid functional<sup>12</sup> with def2-TZVPP/C correlation fitting set<sup>13</sup> and Domain-based Local Pair Natural Orbital (DLPNO) scheme for the treatment of MP2 part of the double hybrid, def2-TZVPP basis set, and applying counterpoise<sup>14</sup> and D3BJ dispersion corrections<sup>15</sup>.

---

<sup>7</sup>a) F. Neese, *WIREs Comput Mol Sci.* 2012, **2**, 73; b) F. Neese, *WIREs Comput Mol Sci.* 2018, **8**, e1327; c) F. Neese, *WIREs Comput Mol Sci.* 2022, **12**, e1606.

<sup>8</sup> F. Weigend, *Phys. Chem. Chem. Phys.* 2006, **8**, 1057

<sup>9</sup> S. Miertuš, E. Scrocco and J. Tomasi, *Chem. Phys.* 1981, **55**, 117.

<sup>10</sup> J.-D. Chai and M. Head-Gordon, *Phys. Chem. Chem. Phys.* 2008, **10**, 6615.

<sup>11</sup> a) F. Weigend and R. Ahlrichs, *Phys. Chem. Chem. Phys.* 2005, **7**, 3297; b) F. Weigend, *Phys. Chem. Chem. Phys.* 2006, **8**, 1057.

<sup>12</sup> S. Kozuch, D. Gruzman and J. M. L. Martin, *J. Phys. Chem. C* 2010, **114**, 20801.

<sup>13</sup> A. Hellweg, C. Hattig, S. Hofener and W. Klopper *Theor. Chem. Acc.* 2007, **117**, 587.

<sup>14</sup> H. Kruse and S. Grimme, *J. Chem. Phys.* 2012, **136**, 154101.

<sup>15</sup> a) S. Grimme, S. Ehrlich and L. Goerigk, *J Comput Chem* 2011, **32**, 1456; b) S. Grimme, J. Antony, S. Ehrlich and H. Krieg, *J. Chem. Phys.* 2010, **132**, 154104.

## Cartesian coordinates

### Dienamine 7

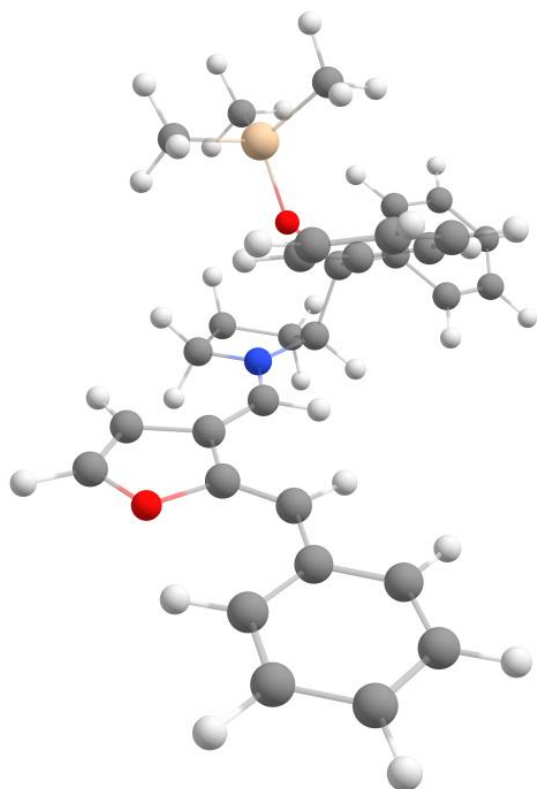

|    |              |              |              |
|----|--------------|--------------|--------------|
| C  | 0.665635000  | 2.317464000  | -2.029329000 |
| C  | 2.141082000  | 0.561158000  | -2.834748000 |
| C  | 2.045513000  | 2.081696000  | -2.658298000 |
| H  | -0.063203000 | 2.706419000  | -2.760221000 |
| H  | 0.712275000  | 3.031774000  | -1.190186000 |
| H  | 3.173848000  | 0.192328000  | -2.786361000 |
| H  | 1.725807000  | 0.258500000  | -3.808176000 |
| H  | 2.833802000  | 2.433884000  | -1.981952000 |
| H  | 2.149376000  | 2.617571000  | -3.611885000 |
| N  | 0.228522000  | 1.002518000  | -1.578923000 |
| C  | 2.059353000  | -0.347001000 | -0.410997000 |
| C  | 1.120696000  | -0.735618000 | 0.750005000  |
| C  | 0.338044000  | 0.269827000  | 1.338884000  |
| C  | 1.033291000  | -2.024398000 | 1.287041000  |
| C  | -0.518376000 | -0.004233000 | 2.401375000  |
| H  | 0.403188000  | 1.290184000  | 0.961900000  |
| C  | 0.178681000  | -2.304360000 | 2.355987000  |
| H  | 1.650118000  | -2.830640000 | 0.890316000  |
| C  | -0.605628000 | -1.298751000 | 2.914896000  |
| H  | -1.119421000 | 0.801709000  | 2.830772000  |
| H  | 0.136830000  | -3.320504000 | 2.756704000  |
| H  | -1.275828000 | -1.518791000 | 3.749770000  |
| C  | 3.025195000  | -1.482507000 | -0.789789000 |
| C  | 4.406104000  | -1.331677000 | -0.648942000 |
| C  | 2.549970000  | -2.679428000 | -1.348922000 |
| C  | 5.287845000  | -2.346505000 | -1.025998000 |
| H  | 4.808262000  | -0.398034000 | -0.259528000 |
| C  | 3.425460000  | -3.694265000 | -1.729207000 |
| H  | 1.477377000  | -2.836361000 | -1.488464000 |
| C  | 4.802062000  | -3.534729000 | -1.565415000 |
| H  | 6.363641000  | -2.197843000 | -0.901205000 |
| H  | 3.025841000  | -4.616969000 | -2.157858000 |
| H  | 5.490136000  | -4.329818000 | -1.863668000 |
| O  | 2.762511000  | 0.820733000  | -0.076436000 |
| Si | 3.480838000  | 1.504230000  | 1.296978000  |

|   |              |              |              |
|---|--------------|--------------|--------------|
| C | 5.131287000  | 2.164581000  | 0.698685000  |
| H | 5.606429000  | 2.764066000  | 1.491643000  |
| H | 5.834224000  | 1.365906000  | 0.417293000  |
| H | 4.986101000  | 2.816055000  | -0.177911000 |
| C | 3.711952000  | 0.259454000  | 2.679119000  |
| H | 4.246585000  | -0.637776000 | 2.330527000  |
| H | 4.307063000  | 0.719951000  | 3.484728000  |
| H | 2.748058000  | -0.059103000 | 3.104050000  |
| C | 2.451868000  | 2.967002000  | 1.862222000  |
| H | 1.545932000  | 2.664426000  | 2.407133000  |
| H | 3.053791000  | 3.602886000  | 2.531587000  |
| H | 2.149343000  | 3.579772000  | 0.997612000  |
| C | 1.253423000  | -0.020363000 | -1.724714000 |
| H | 0.766408000  | -0.951902000 | -2.044808000 |
| C | -1.031196000 | 0.695807000  | -1.215898000 |
| H | -1.190651000 | -0.378301000 | -1.080844000 |
| C | -2.096687000 | 1.519006000  | -0.971648000 |
| C | -3.409328000 | 1.015760000  | -0.538343000 |
| C | -2.237106000 | 2.977993000  | -0.958559000 |
| O | -4.213143000 | 2.103573000  | -0.315374000 |
| C | -3.490620000 | 3.245003000  | -0.568395000 |
| H | -1.486810000 | 3.724026000  | -1.204918000 |
| H | -4.028379000 | 4.179068000  | -0.419437000 |
| C | -3.846206000 | -0.255260000 | -0.339872000 |
| H | -3.114381000 | -1.038273000 | -0.554260000 |
| C | -5.149265000 | -0.731407000 | 0.121395000  |
| C | -5.337136000 | -2.123876000 | 0.256423000  |
| C | -6.242540000 | 0.100770000  | 0.443664000  |
| C | -6.546948000 | -2.659259000 | 0.687520000  |
| H | -4.506555000 | -2.794493000 | 0.015364000  |
| C | -7.452824000 | -0.439779000 | 0.875551000  |
| H | -6.139182000 | 1.181737000  | 0.353726000  |
| C | -7.617878000 | -1.819620000 | 1.001620000  |
| H | -6.654856000 | -3.743768000 | 0.779699000  |
| H | -8.281116000 | 0.232533000  | 1.117535000  |
| H | -8.569264000 | -2.236032000 | 1.342570000  |

### Imine 2

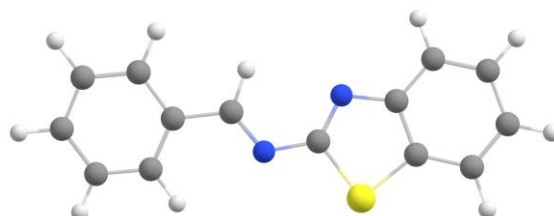

|   |              |              |              |
|---|--------------|--------------|--------------|
| C | -2.557336000 | 0.698831000  | 0.061919000  |
| C | -3.017134000 | -0.634564000 | -0.021861000 |
| C | -4.382146000 | -0.937352000 | -0.069993000 |
| C | -5.286143000 | 0.116200000  | -0.033077000 |
| C | -4.842036000 | 1.449068000  | 0.049089000  |
| C | -3.489031000 | 1.748972000  | 0.097490000  |
| C | -0.595046000 | -0.305368000 | 0.046537000  |
| H | -4.726794000 | -1.971880000 | -0.133480000 |
| H | -6.357848000 | -0.094310000 | -0.068565000 |
| H | -5.575521000 | 2.258744000  | 0.076103000  |
| H | -3.133269000 | 2.779676000  | 0.160572000  |
| N | 0.766954000  | -0.562272000 | 0.065293000  |
| N | -1.184875000 | 0.843822000  | 0.101124000  |
| S | -1.648023000 | -1.705041000 | -0.046876000 |
| C | 1.569185000  | 0.430201000  | -0.046473000 |
| H | 1.185703000  | 1.457366000  | -0.169119000 |
| C | 3.026440000  | 0.267747000  | -0.020145000 |
| C | 3.618833000  | -0.999120000 | 0.106192000  |
| C | 3.839098000  | 1.405000000  | -0.126036000 |
| C | 5.003151000  | -1.120944000 | 0.125014000  |
| H | 2.975985000  | -1.878737000 | 0.185745000  |

|   |             |              |              |
|---|-------------|--------------|--------------|
| C | 5.226916000 | 1.280410000  | -0.105010000 |
| H | 3.375405000 | 2.390904000  | -0.224295000 |
| C | 5.808024000 | 0.018343000  | 0.019769000  |
| H | 5.463084000 | -2.107508000 | 0.221890000  |
| H | 5.856358000 | 2.169833000  | -0.186022000 |
| H | 6.896551000 | -0.081384000 | 0.035187000  |

### Catalyst C1

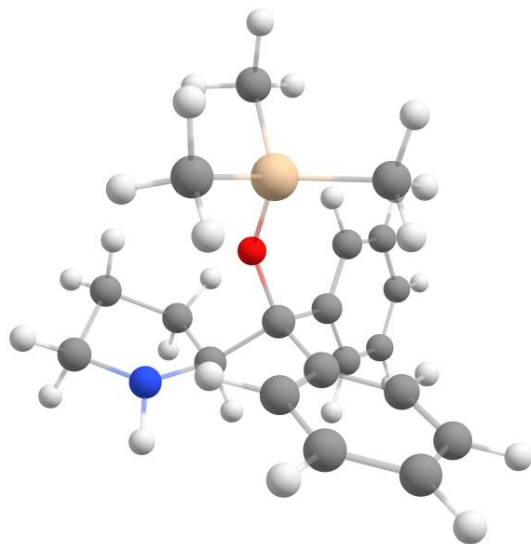

|    |              |              |              |
|----|--------------|--------------|--------------|
| C  | -0.668846000 | 0.737859000  | -2.990194000 |
| C  | -1.250078000 | 2.314703000  | -1.314959000 |
| C  | -1.387304000 | 2.068923000  | -2.817307000 |
| H  | 0.425306000  | 0.905743000  | -3.054466000 |
| H  | -0.971026000 | 0.203600000  | -3.906448000 |
| H  | -2.008971000 | 3.003892000  | -0.921769000 |
| H  | -0.264062000 | 2.754077000  | -1.095294000 |
| H  | -2.449416000 | 1.962308000  | -3.084946000 |
| H  | -0.953561000 | 2.871352000  | -3.431655000 |
| N  | -1.051762000 | -0.006495000 | -1.795013000 |
| C  | -2.717579000 | 0.651338000  | 0.009593000  |
| C  | -2.822774000 | -0.774740000 | 0.594000000  |
| C  | -2.737198000 | -1.876199000 | -0.272211000 |
| C  | -3.086629000 | -1.030451000 | 1.945620000  |
| C  | -2.893811000 | -3.179207000 | 0.194806000  |
| H  | -2.538221000 | -1.691258000 | -1.327002000 |
| C  | -3.246777000 | -2.334950000 | 2.417358000  |
| H  | -3.190696000 | -0.205916000 | 2.651767000  |
| C  | -3.150394000 | -3.416998000 | 1.545697000  |
| H  | -2.819219000 | -4.015575000 | -0.505801000 |
| H  | -3.456861000 | -2.500961000 | 3.477380000  |
| H  | -3.277845000 | -4.438072000 | 1.915040000  |
| C  | -2.870176000 | 1.712764000  | 1.112559000  |
| C  | -3.974853000 | 2.566682000  | 1.141744000  |
| C  | -1.890961000 | 1.869877000  | 2.105834000  |
| C  | -4.112247000 | 3.537956000  | 2.135982000  |
| H  | -4.735458000 | 2.481370000  | 0.365895000  |
| C  | -2.020451000 | 2.841071000  | 3.096542000  |
| H  | -1.014449000 | 1.216690000  | 2.122473000  |
| C  | -3.135533000 | 3.680743000  | 3.118352000  |
| H  | -4.990975000 | 4.188462000  | 2.135617000  |
| H  | -1.243897000 | 2.940889000  | 3.859619000  |
| H  | -3.239999000 | 4.441623000  | 3.896209000  |
| O  | -3.700051000 | 0.847151000  | -0.976230000 |
| Si | -5.224967000 | 0.237755000  | -1.359887000 |
| C  | -6.148511000 | 1.715994000  | -2.053031000 |
| H  | -7.133616000 | 1.403361000  | -2.435297000 |
| H  | -6.313343000 | 2.496456000  | -1.293853000 |
| H  | -5.587851000 | 2.165495000  | -2.888054000 |

|   |              |              |              |
|---|--------------|--------------|--------------|
| C | -6.124356000 | -0.458762000 | 0.132016000  |
| H | -6.116174000 | 0.250929000  | 0.974060000  |
| H | -7.175144000 | -0.657529000 | -0.135952000 |
| H | -5.674886000 | -1.402388000 | -0.476910000 |
| C | -5.073588000 | -1.050709000 | -2.715233000 |
| H | -4.710035000 | -2.016664000 | -2.335413000 |
| H | -6.055974000 | -1.215952000 | -3.186498000 |
| H | -4.376141000 | -0.702542000 | -3.493821000 |
| C | -1.331368000 | 0.904135000  | -0.684950000 |
| H | -0.567063000 | 0.796127000  | 0.101640000  |
| H | -0.376037000 | -0.720787000 | -1.546536000 |

### Benzo[d]thiazol-2-amine

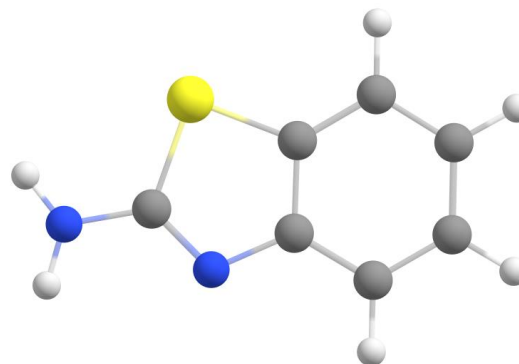

|   |              |              |              |
|---|--------------|--------------|--------------|
| C | -2.596081000 | 0.802578000  | -0.234227000 |
| C | -1.250171000 | 0.455574000  | -0.342927000 |
| C | -0.215280000 | 1.400310000  | -0.167323000 |
| C | -0.555305000 | 2.728088000  | 0.125515000  |
| C | -1.896983000 | 3.080016000  | 0.234479000  |
| C | -2.911596000 | 2.128076000  | 0.057071000  |
| H | -3.381826000 | 0.056242000  | -0.373740000 |
| H | 0.238106000  | 3.466056000  | 0.264662000  |
| H | -2.163773000 | 4.115252000  | 0.462687000  |
| H | -3.959243000 | 2.425360000  | 0.146884000  |
| C | 1.057176000  | -0.358270000 | -0.573287000 |
| N | 1.071261000  | 0.910907000  | -0.305047000 |
| N | 2.156720000  | -1.121421000 | -0.729702000 |
| H | 2.088879000  | -2.055728000 | -1.110311000 |
| H | 3.050655000  | -0.650200000 | -0.798967000 |
| S | -0.544383000 | -1.106095000 | -0.692721000 |

RC

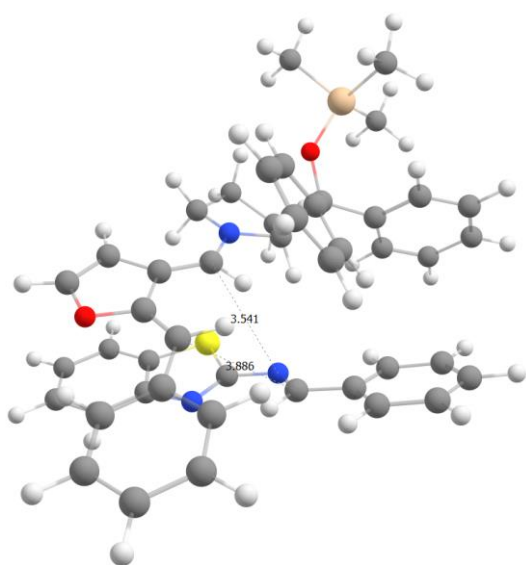

|    |              |              |              |
|----|--------------|--------------|--------------|
| C  | 0.571495000  | -3.189788000 | -0.712722000 |
| C  | 2.103572000  | -2.585759000 | 1.039422000  |
| C  | 1.852047000  | -3.651653000 | -0.027841000 |
| H  | -0.320623000 | -3.648167000 | -0.248898000 |
| H  | 0.552266000  | -3.428107000 | -1.788518000 |
| H  | 3.163189000  | -2.528835000 | 1.316705000  |
| H  | 1.527564000  | -2.812146000 | 1.950753000  |
| H  | 2.681576000  | -3.664924000 | -0.745367000 |
| H  | 1.749978000  | -4.659154000 | 0.398593000  |
| N  | 0.543105000  | -1.749718000 | -0.499235000 |
| C  | 2.690393000  | -0.396676000 | -0.236891000 |
| C  | 2.025366000  | 0.628237000  | -1.167623000 |
| C  | 1.861112000  | 0.338893000  | -2.524004000 |
| C  | 1.482812000  | 1.817451000  | -0.665695000 |
| C  | 1.157894000  | 1.208656000  | -3.359025000 |
| H  | 2.275568000  | -0.589782000 | -2.920148000 |
| C  | 0.783356000  | 2.689946000  | -1.497903000 |
| H  | 1.601591000  | 2.066907000  | 0.391457000  |
| C  | 0.613315000  | 2.386514000  | -2.849197000 |
| H  | 1.030107000  | 0.958702000  | -4.415607000 |
| H  | 0.365720000  | 3.611237000  | -1.083301000 |
| H  | 0.053341000  | 3.063879000  | -3.499176000 |
| C  | 3.529232000  | 0.333823000  | 0.831034000  |
| C  | 4.391391000  | 1.357969000  | 0.413354000  |
| C  | 3.516644000  | 0.007533000  | 2.191605000  |
| C  | 5.242259000  | 2.001607000  | 1.307323000  |
| H  | 4.388852000  | 1.666050000  | -0.634526000 |
| C  | 4.367843000  | 0.649291000  | 3.093683000  |
| H  | 2.840630000  | -0.752392000 | 2.582510000  |
| C  | 5.242315000  | 1.640115000  | 2.655563000  |
| H  | 5.907039000  | 2.791978000  | 0.949281000  |
| H  | 4.337884000  | 0.369243000  | 4.149816000  |
| H  | 5.909519000  | 2.140876000  | 3.361840000  |
| O  | 3.491913000  | -1.262050000 | -1.004717000 |
| Si | 5.129819000  | -1.541429000 | -1.311465000 |
| C  | 6.085878000  | -1.854757000 | 0.270674000  |
| H  | 7.117548000  | -2.153754000 | 0.022837000  |
| H  | 6.133377000  | -0.958504000 | 0.907874000  |
| H  | 5.627131000  | -2.669516000 | 0.852740000  |
| C  | 5.908479000  | -0.148345000 | -2.301365000 |
| H  | 6.181475000  | 0.716444000  | -1.679956000 |
| H  | 6.827825000  | -0.519521000 | -2.783098000 |
| H  | 5.225585000  | 0.195393000  | -3.094720000 |
| C  | 5.102568000  | -3.087894000 | -2.367585000 |
| H  | 4.511123000  | -2.927057000 | -3.282743000 |
| H  | 6.126811000  | -3.360565000 | -2.668487000 |

|   |              |              |              |
|---|--------------|--------------|--------------|
| H | 4.669334000  | -3.942519000 | -1.825349000 |
| C | 1.574366000  | -1.273809000 | 0.431459000  |
| H | 1.085787000  | -0.647499000 | 1.195474000  |
| C | -0.522759000 | -0.986456000 | -0.812064000 |
| H | -0.430234000 | 0.046513000  | -0.470164000 |
| C | -1.676139000 | -1.301195000 | -1.477790000 |
| C | -2.726901000 | -0.301831000 | -1.716904000 |
| C | -2.236834000 | -2.554904000 | -1.990269000 |
| O | -3.807385000 | -0.956109000 | -2.246564000 |
| C | -3.481065000 | -2.282187000 | -2.406313000 |
| H | -1.770970000 | -3.535635000 | -2.015771000 |
| H | -4.264020000 | -2.906872000 | -2.830944000 |
| C | -2.724611000 | 1.039024000  | -1.502977000 |
| H | -1.778174000 | 1.451357000  | -1.145829000 |
| C | -3.807574000 | 2.006199000  | -1.649367000 |
| C | -3.522551000 | 3.365721000  | -1.396314000 |
| C | -5.132745000 | 1.680343000  | -2.008722000 |
| C | -4.503129000 | 4.348034000  | -1.495564000 |
| H | -2.501594000 | 3.645718000  | -1.117390000 |
| C | -6.112444000 | 2.667512000  | -2.104869000 |
| H | -5.393329000 | 0.641818000  | -2.212937000 |
| C | -5.809993000 | 4.006086000  | -1.850893000 |
| H | -4.245507000 | 5.391586000  | -1.293172000 |
| H | -7.131541000 | 2.382663000  | -2.382474000 |
| H | -6.583246000 | 4.774584000  | -1.930737000 |
| C | -3.859532000 | -1.566330000 | 1.341140000  |
| C | -3.124550000 | -2.739284000 | 1.624305000  |
| C | -3.647017000 | -4.010903000 | 1.368007000  |
| C | -4.918053000 | -4.093117000 | 0.814197000  |
| C | -5.657530000 | -2.932472000 | 0.519794000  |
| C | -5.141553000 | -1.672073000 | 0.780428000  |
| C | -2.023322000 | -0.607986000 | 2.090333000  |
| H | -3.070036000 | -4.911146000 | 1.591053000  |
| H | -5.347921000 | -5.074983000 | 0.601116000  |
| H | -6.651703000 | -3.027748000 | 0.076179000  |
| H | -5.700938000 | -0.763728000 | 0.546357000  |
| N | -1.057865000 | 0.326951000  | 2.432264000  |
| N | -3.210464000 | -0.384182000 | 1.635152000  |
| S | -1.577971000 | -2.295068000 | 2.278794000  |
| C | -1.237191000 | 1.538195000  | 2.052520000  |
| H | -2.132921000 | 1.822643000  | 1.473996000  |
| C | -0.257252000 | 2.593967000  | 2.321672000  |
| C | 0.906033000  | 2.339231000  | 3.064896000  |
| C | -0.465917000 | 3.867818000  | 1.775694000  |
| C | 1.852596000  | 3.341363000  | 3.240841000  |
| H | 1.059927000  | 1.343638000  | 3.486472000  |
| C | 0.485585000  | 4.870782000  | 1.952063000  |
| H | -1.373789000 | 4.063640000  | 1.197531000  |
| C | 1.646160000  | 4.605822000  | 2.679809000  |
| H | 2.762750000  | 3.136315000  | 3.809331000  |
| H | 0.324360000  | 5.859841000  | 1.516749000  |
| H | 2.396689000  | 5.389085000  | 2.814748000  |

# TS1

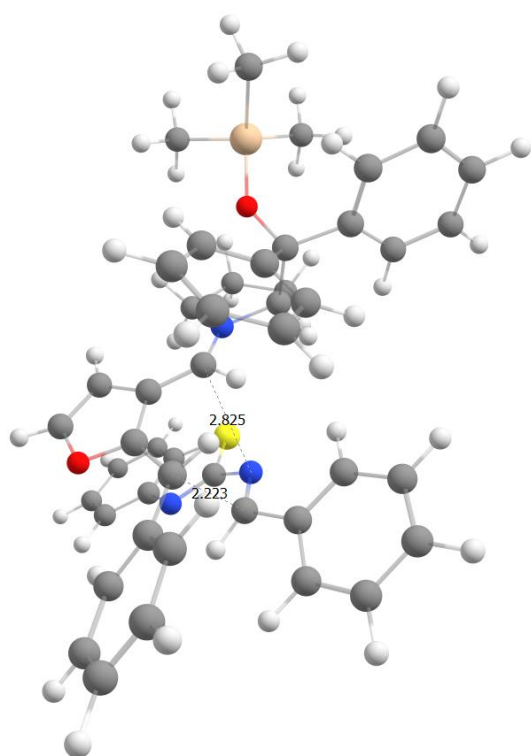

|    |              |              |              |
|----|--------------|--------------|--------------|
| C  | 1.334445000  | 2.587941000  | 0.391089000  |
| C  | 2.674828000  | 1.789805000  | -1.498058000 |
| C  | 2.472974000  | 2.984470000  | -0.555076000 |
| H  | 0.433462000  | 3.195914000  | 0.230091000  |
| H  | 1.624357000  | 2.665607000  | 1.451145000  |
| H  | 3.734401000  | 1.633343000  | -1.733332000 |
| H  | 2.144985000  | 1.954324000  | -2.448191000 |
| H  | 3.387749000  | 3.191537000  | 0.013027000  |
| H  | 2.222644000  | 3.895826000  | -1.114618000 |
| N  | 1.029754000  | 1.198541000  | 0.057314000  |
| C  | 3.045629000  | -0.287627000 | 0.042797000  |
| C  | 2.230994000  | -1.302965000 | 0.860899000  |
| C  | 1.977750000  | -1.085822000 | 2.216059000  |
| C  | 1.649639000  | -2.412991000 | 0.234402000  |
| C  | 1.147124000  | -1.951341000 | 2.931226000  |
| H  | 2.423527000  | -0.218160000 | 2.705592000  |
| C  | 0.816433000  | -3.274965000 | 0.944355000  |
| H  | 1.839500000  | -2.601452000 | -0.826276000 |
| C  | 0.558985000  | -3.044374000 | 2.297678000  |
| H  | 0.951575000  | -1.761388000 | 3.989817000  |
| H  | 0.358118000  | -4.126725000 | 0.434728000  |
| H  | -0.099965000 | -3.714857000 | 2.855410000  |
| C  | 4.035960000  | -1.059620000 | -0.844811000 |
| C  | 4.921046000  | -1.940019000 | -0.206825000 |
| C  | 4.105689000  | -0.950650000 | -2.236760000 |
| C  | 5.884265000  | -2.643535000 | -0.922239000 |
| H  | 4.842454000  | -2.085801000 | 0.872965000  |
| C  | 5.064633000  | -1.663881000 | -2.961797000 |
| H  | 3.414206000  | -0.314081000 | -2.789774000 |
| C  | 5.966310000  | -2.499677000 | -2.308886000 |
| H  | 6.567066000  | -3.315077000 | -0.395437000 |
| H  | 5.101383000  | -1.559023000 | -4.049094000 |
| H  | 6.719790000  | -3.050646000 | -2.877477000 |
| O  | 3.696507000  | 0.593489000  | 0.918798000  |
| Si | 5.244292000  | 1.077560000  | 1.394683000  |
| C  | 6.298507000  | 1.527595000  | -0.087054000 |
| H  | 7.276015000  | 1.902635000  | 0.257612000  |
| H  | 6.477090000  | 0.657918000  | -0.738249000 |

|   |              |              |              |
|---|--------------|--------------|--------------|
| H | 5.824964000  | 2.320154000  | -0.687200000 |
| C | 6.100001000  | -0.207459000 | 2.462974000  |
| H | 6.577451000  | -1.008952000 | 1.881758000  |
| H | 6.885622000  | 0.292427000  | 3.053102000  |
| H | 5.388327000  | -0.664027000 | 3.169563000  |
| C | 4.895352000  | 2.573296000  | 2.466359000  |
| H | 4.251201000  | 2.290525000  | 3.314345000  |
| H | 5.834685000  | 2.978746000  | 2.875175000  |
| H | 4.391502000  | 3.378334000  | 1.910572000  |
| C | 2.047567000  | 0.576129000  | -0.796010000 |
| H | 1.533321000  | -0.085364000 | -1.508264000 |
| C | -0.060912000 | 0.549900000  | 0.421188000  |
| H | -0.131193000 | -0.462572000 | 0.026112000  |
| C | -1.106813000 | 0.969195000  | 1.242289000  |
| C | -2.263282000 | 0.155622000  | 1.411415000  |
| C | -1.386816000 | 2.195075000  | 1.974420000  |
| O | -3.150576000 | 0.824187000  | 2.174774000  |
| C | -2.617595000 | 2.043065000  | 2.497856000  |
| H | -0.753157000 | 3.068625000  | 2.096961000  |
| H | -3.244143000 | 2.682147000  | 3.115263000  |
| C | -2.545768000 | -1.109479000 | 0.873725000  |
| H | -1.651017000 | -1.706235000 | 0.684874000  |
| C | -3.733995000 | -1.897878000 | 1.235447000  |
| C | -3.612895000 | -3.287871000 | 1.406578000  |
| C | -5.016956000 | -1.329515000 | 1.339647000  |
| C | -4.723774000 | -4.078921000 | 1.691897000  |
| H | -2.626528000 | -3.751250000 | 1.308187000  |
| C | -6.127398000 | -2.121556000 | 1.624824000  |
| H | -5.142301000 | -0.256040000 | 1.182717000  |
| C | -5.988306000 | -3.499387000 | 1.805472000  |
| H | -4.600194000 | -5.157580000 | 1.822491000  |
| H | -7.114609000 | -1.657266000 | 1.700751000  |
| H | -6.861597000 | -4.117621000 | 2.029282000  |
| C | -3.534564000 | 3.303624000  | -0.792068000 |
| C | -2.470805000 | 3.998909000  | -1.414073000 |
| C | -2.417884000 | 5.393298000  | -1.433466000 |
| C | -3.445774000 | 6.103076000  | -0.816942000 |
| C | -4.507473000 | 5.427746000  | -0.194800000 |
| C | -4.560146000 | 4.038461000  | -0.178890000 |
| C | -2.374849000 | 1.528950000  | -1.451354000 |
| H | -1.589327000 | 5.915206000  | -1.918487000 |
| H | -3.423007000 | 7.195687000  | -0.819060000 |
| H | -5.304742000 | 6.001805000  | 0.284789000  |
| H | -5.381261000 | 3.506673000  | 0.307814000  |
| N | -1.942175000 | 0.267785000  | -1.667552000 |
| N | -3.454770000 | 1.927397000  | -0.835914000 |
| S | -1.350310000 | 2.839363000  | -2.080556000 |
| C | -2.758819000 | -0.715529000 | -1.303400000 |
| H | -3.820412000 | -0.498539000 | -1.121251000 |
| C | -2.446665000 | -2.089995000 | -1.763358000 |
| C | -1.146645000 | -2.437452000 | -2.157895000 |
| C | -3.452080000 | -3.064184000 | -1.808659000 |
| C | -0.853640000 | -3.736105000 | -2.562405000 |
| H | -0.370835000 | -1.668706000 | -2.144928000 |
| C | -3.161121000 | -4.363583000 | -2.224634000 |
| H | -4.471618000 | -2.798791000 | -1.515438000 |
| C | -1.860608000 | -4.705320000 | -2.594448000 |
| H | 0.166383000  | -3.996365000 | -2.858026000 |
| H | -3.956007000 | -5.113298000 | -2.257812000 |
| H | -1.630127000 | -5.725414000 | -2.912966000 |

# INT1

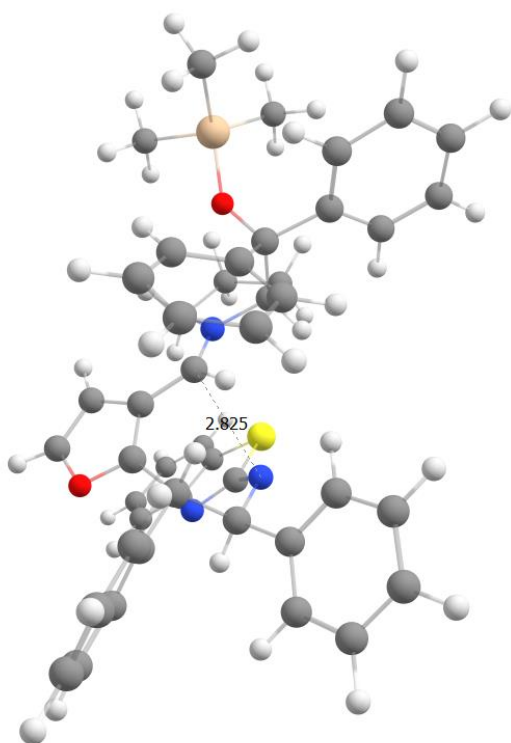

|    |              |              |              |
|----|--------------|--------------|--------------|
| C  | 1.496889000  | 2.514604000  | 0.517119000  |
| C  | 2.803066000  | 1.715438000  | -1.391947000 |
| C  | 2.692353000  | 2.856782000  | -0.373134000 |
| H  | 0.633288000  | 3.170828000  | 0.333723000  |
| H  | 1.747412000  | 2.544890000  | 1.587634000  |
| H  | 3.850053000  | 1.488081000  | -1.624449000 |
| H  | 2.301112000  | 1.985892000  | -2.332129000 |
| H  | 3.605915000  | 2.925225000  | 0.229694000  |
| H  | 2.549732000  | 3.826003000  | -0.869131000 |
| N  | 1.119018000  | 1.147459000  | 0.145210000  |
| C  | 2.998074000  | -0.493458000 | -0.012240000 |
| C  | 2.110326000  | -1.498358000 | 0.740957000  |
| C  | 1.877965000  | -1.352866000 | 2.109695000  |
| C  | 1.446554000  | -2.518737000 | 0.046428000  |
| C  | 0.991704000  | -2.203551000 | 2.774092000  |
| H  | 2.385080000  | -0.552644000 | 2.651658000  |
| C  | 0.560040000  | -3.366619000 | 0.706824000  |
| H  | 1.617078000  | -2.648858000 | -1.026423000 |
| C  | 0.328613000  | -3.210321000 | 2.075634000  |
| H  | 0.815869000  | -2.071517000 | 3.844726000  |
| H  | 0.043086000  | -4.151679000 | 0.148991000  |
| H  | -0.366553000 | -3.874609000 | 2.595467000  |
| C  | 3.912750000  | -1.275873000 | -0.970043000 |
| C  | 4.711135000  | -2.287156000 | -0.417432000 |
| C  | 3.982620000  | -1.062329000 | -2.349897000 |
| C  | 5.589783000  | -3.026109000 | -1.202721000 |
| H  | 4.625638000  | -2.513826000 | 0.647517000  |
| C  | 4.856459000  | -1.809165000 | -3.144860000 |
| H  | 3.352596000  | -0.320301000 | -2.841149000 |
| C  | 5.671861000  | -2.782873000 | -2.575325000 |
| H  | 6.203521000  | -3.804843000 | -0.742660000 |
| H  | 4.892435000  | -1.623274000 | -4.221245000 |
| H  | 6.354958000  | -3.364684000 | -3.199340000 |
| O  | 3.715655000  | 0.276863000  | 0.911065000  |
| Si | 5.289457000  | 0.528030000  | 1.480433000  |
| C  | 6.439847000  | 0.998245000  | 0.079634000  |
| H  | 7.436224000  | 1.239946000  | 0.484264000  |
| H  | 6.557470000  | 0.177199000  | -0.644700000 |

|   |              |              |              |
|---|--------------|--------------|--------------|
| H | 6.069419000  | 1.884884000  | -0.458052000 |
| C | 5.954328000  | -0.948250000 | 2.431307000  |
| H | 6.427287000  | -1.698120000 | 1.781005000  |
| H | 6.714481000  | -0.597314000 | 3.148208000  |
| H | 5.152981000  | -1.440490000 | 3.005259000  |
| C | 5.053532000  | 1.949822000  | 2.674221000  |
| H | 4.364455000  | 1.658706000  | 3.483065000  |
| H | 6.015158000  | 2.231621000  | 3.131935000  |
| H | 4.639121000  | 2.839785000  | 2.176670000  |
| C | 2.076246000  | 0.509594000  | -0.777651000 |
| H | 1.490943000  | -0.043910000 | -1.526089000 |
| C | 0.017777000  | 0.554658000  | 0.496038000  |
| H | -0.138614000 | -0.429688000 | 0.058694000  |
| C | -1.010144000 | 1.040906000  | 1.349167000  |
| C | -2.244146000 | 0.403435000  | 1.361072000  |
| C | -1.146271000 | 2.185435000  | 2.223499000  |
| O | -3.068196000 | 1.050405000  | 2.178357000  |
| C | -2.411419000 | 2.128000000  | 2.696746000  |
| H | -0.403908000 | 2.934193000  | 2.484492000  |
| H | -2.981230000 | 2.743561000  | 3.387691000  |
| C | -2.691766000 | -0.800889000 | 0.608177000  |
| H | -1.841335000 | -1.500074000 | 0.636420000  |
| C | -3.877063000 | -1.499585000 | 1.239589000  |
| C | -3.748803000 | -2.812885000 | 1.701130000  |
| C | -5.129386000 | -0.876736000 | 1.318265000  |
| C | -4.845297000 | -3.495073000 | 2.229048000  |
| H | -2.777746000 | -3.312043000 | 1.633443000  |
| C | -6.225884000 | -1.554776000 | 1.847123000  |
| H | -5.248696000 | 0.148389000  | 0.957423000  |
| C | -6.087972000 | -2.867248000 | 2.303171000  |
| H | -4.726966000 | -4.523673000 | 2.579799000  |
| H | -7.197084000 | -1.055713000 | 1.899807000  |
| H | -6.950009000 | -3.398420000 | 2.715210000  |
| C | -2.824760000 | 3.602498000  | -0.888173000 |
| C | -1.669525000 | 4.032024000  | -1.595004000 |
| C | -1.324873000 | 5.376279000  | -1.699696000 |
| C | -2.143184000 | 6.331177000  | -1.090471000 |
| C | -3.288186000 | 5.929089000  | -0.391204000 |
| C | -3.632236000 | 4.582781000  | -0.286619000 |
| C | -2.087886000 | 1.566342000  | -1.462459000 |
| H | -0.429435000 | 5.679502000  | -2.249151000 |
| H | -1.887366000 | 7.391259000  | -1.162632000 |
| H | -3.923208000 | 6.683088000  | 0.082653000  |
| H | -4.522449000 | 4.268857000  | 0.264863000  |
| N | -1.910869000 | 0.275649000  | -1.549522000 |
| N | -3.041642000 | 2.250787000  | -0.836544000 |
| S | -0.851147000 | 2.628631000  | -2.246514000 |
| C | -2.944007000 | -0.515673000 | -0.942980000 |
| H | -3.920534000 | -0.002671000 | -0.991314000 |
| C | -3.064371000 | -1.865653000 | -1.630821000 |
| C | -1.916446000 | -2.562488000 | -2.025584000 |
| C | -4.312683000 | -2.459416000 | -1.839299000 |
| C | -2.012246000 | -3.828801000 | -2.600415000 |
| H | -0.940130000 | -2.091690000 | -1.885688000 |
| C | -4.414294000 | -3.727173000 | -2.414964000 |
| H | -5.218478000 | -1.924254000 | -1.539196000 |
| C | -3.263647000 | -4.418189000 | -2.794068000 |
| H | -1.104318000 | -4.358472000 | -2.902928000 |
| H | -5.399571000 | -4.176242000 | -2.566991000 |
| H | -3.340990000 | -5.410788000 | -3.245910000 |

dr-RC

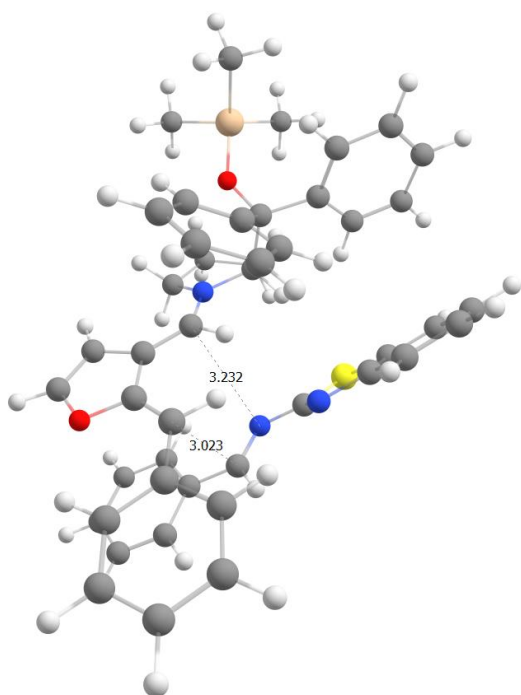

|    |              |              |              |
|----|--------------|--------------|--------------|
| C  | -0.737224000 | -2.940194000 | -1.378739000 |
| C  | -2.300932000 | -1.305267000 | -2.271651000 |
| C  | -1.994213000 | -2.806104000 | -2.241483000 |
| H  | 0.167165000  | -3.116317000 | -1.986044000 |
| H  | -0.820765000 | -3.768519000 | -0.656048000 |
| H  | -3.376399000 | -1.115041000 | -2.371526000 |
| H  | -1.794981000 | -0.819293000 | -3.120776000 |
| H  | -2.826468000 | -3.350046000 | -1.780458000 |
| H  | -1.840634000 | -3.218298000 | -3.248162000 |
| N  | -0.607814000 | -1.658945000 | -0.699735000 |
| C  | -2.732317000 | -0.641115000 | 0.214215000  |
| C  | -1.930585000 | -0.419263000 | 1.503500000  |
| C  | -1.626646000 | -1.489286000 | 2.346110000  |
| C  | -1.392228000 | 0.840555000  | 1.791389000  |
| C  | -0.787164000 | -1.309857000 | 3.447175000  |
| H  | -2.037807000 | -2.474797000 | 2.119875000  |
| C  | -0.550509000 | 1.021764000  | 2.886511000  |
| H  | -1.622756000 | 1.691447000  | 1.143871000  |
| C  | -0.239555000 | -0.056608000 | 3.716899000  |
| H  | -0.551221000 | -2.160451000 | 4.092107000  |
| H  | -0.131787000 | 2.011029000  | 3.089482000  |
| H  | 0.428399000  | 0.082012000  | 4.570988000  |
| C  | -3.718545000 | 0.526464000  | 0.024208000  |
| C  | -4.528876000 | 0.883884000  | 1.112129000  |
| C  | -3.870835000 | 1.241661000  | -1.167578000 |
| C  | -5.489585000 | 1.884330000  | 1.003701000  |
| H  | -4.394089000 | 0.375317000  | 2.069599000  |
| C  | -4.832669000 | 2.248865000  | -1.281527000 |
| H  | -3.238447000 | 1.038809000  | -2.032019000 |
| C  | -5.651570000 | 2.568713000  | -0.202659000 |
| H  | -6.109439000 | 2.136631000  | 1.867925000  |
| H  | -4.932800000 | 2.789114000  | -2.226319000 |
| H  | -6.403774000 | 3.356276000  | -0.295610000 |
| O  | -3.399530000 | -1.876831000 | 0.280611000  |
| Si | -4.975472000 | -2.464368000 | 0.445186000  |
| C  | -6.124749000 | -1.737104000 | -0.845428000 |
| H  | -7.092883000 | -2.263098000 | -0.811358000 |
| H  | -6.312125000 | -0.665693000 | -0.676462000 |
| H  | -5.707090000 | -1.860643000 | -1.857207000 |
| C  | -5.650106000 | -2.195854000 | 2.177675000  |
| H  | -6.059056000 | -1.185994000 | 2.325067000  |

|   |              |              |              |
|---|--------------|--------------|--------------|
| H | -6.462073000 | -2.917745000 | 2.363988000  |
| H | -4.866853000 | -2.367036000 | 2.933323000  |
| C | -4.765104000 | -4.304425000 | 0.167243000  |
| H | -4.029705000 | -4.721663000 | 0.873185000  |
| H | -5.723052000 | -4.825030000 | 0.325989000  |
| H | -4.425203000 | -4.528318000 | -0.855501000 |
| C | -1.713195000 | -0.740091000 | -0.969043000 |
| H | -1.296852000 | 0.266839000  | -1.120111000 |
| C | 0.508846000  | -1.259046000 | -0.068641000 |
| H | 0.495167000  | -0.203927000 | 0.215733000  |
| C | 1.631856000  | -1.972047000 | 0.265143000  |
| C | 2.796009000  | -1.342546000 | 0.894265000  |
| C | 2.005603000  | -3.379789000 | 0.113065000  |
| O | 3.756597000  | -2.306477000 | 1.040506000  |
| C | 3.256045000  | -3.501054000 | 0.579738000  |
| H | 1.408611000  | -4.190433000 | -0.294912000 |
| H | 3.930965000  | -4.350539000 | 0.658936000  |
| C | 3.003630000  | -0.051290000 | 1.270977000  |
| H | 2.164362000  | 0.628037000  | 1.105292000  |
| C | 4.216964000  | 0.575634000  | 1.784816000  |
| C | 4.223554000  | 1.980643000  | 1.929135000  |
| C | 5.404057000  | -0.112984000 | 2.113164000  |
| C | 5.356064000  | 2.664288000  | 2.360481000  |
| H | 3.317095000  | 2.539555000  | 1.676225000  |
| C | 6.535055000  | 0.576092000  | 2.548721000  |
| H | 5.439461000  | -1.197683000 | 2.017737000  |
| C | 6.525295000  | 1.966082000  | 2.672712000  |
| H | 5.326295000  | 3.753841000  | 2.451570000  |
| H | 7.440657000  | 0.013295000  | 2.793690000  |
| H | 7.417533000  | 2.499720000  | 3.010338000  |
| C | 0.086050000  | 3.297140000  | -0.439201000 |
| C | -0.745189000 | 3.356877000  | -1.578295000 |
| C | -1.856362000 | 4.202604000  | -1.630574000 |
| C | -2.135483000 | 4.984397000  | -0.516313000 |
| C | -1.314277000 | 4.936725000  | 0.624334000  |
| C | -0.203981000 | 4.105261000  | 0.670338000  |
| C | 1.141520000  | 1.793874000  | -1.668552000 |
| H | -2.492833000 | 4.238726000  | -2.517227000 |
| H | -3.007501000 | 5.642759000  | -0.527706000 |
| H | -1.554803000 | 5.564529000  | 1.485742000  |
| H | 0.441117000  | 4.062703000  | 1.550855000  |
| N | 1.999985000  | 0.795016000  | -2.070236000 |
| N | 1.137314000  | 2.402606000  | -0.525783000 |
| S | -0.153669000 | 2.238809000  | -2.774796000 |
| C | 3.202386000  | 0.805799000  | -1.621183000 |
| H | 3.578129000  | 1.651109000  | -1.020597000 |
| C | 4.144129000  | -0.284694000 | -1.888703000 |
| C | 3.730493000  | -1.452143000 | -2.547527000 |
| C | 5.464847000  | -0.174964000 | -1.434436000 |
| C | 4.626602000  | -2.496811000 | -2.742053000 |
| H | 2.695403000  | -1.526997000 | -2.888017000 |
| C | 6.361639000  | -1.222856000 | -1.630764000 |
| H | 5.781553000  | 0.731361000  | -0.910338000 |
| C | 5.942052000  | -2.384220000 | -2.281035000 |
| H | 4.299023000  | -3.408632000 | -3.247670000 |
| H | 7.388900000  | -1.137129000 | -1.268285000 |
| H | 6.644385000  | -3.208634000 | -2.430426000 |

# dr-TS1

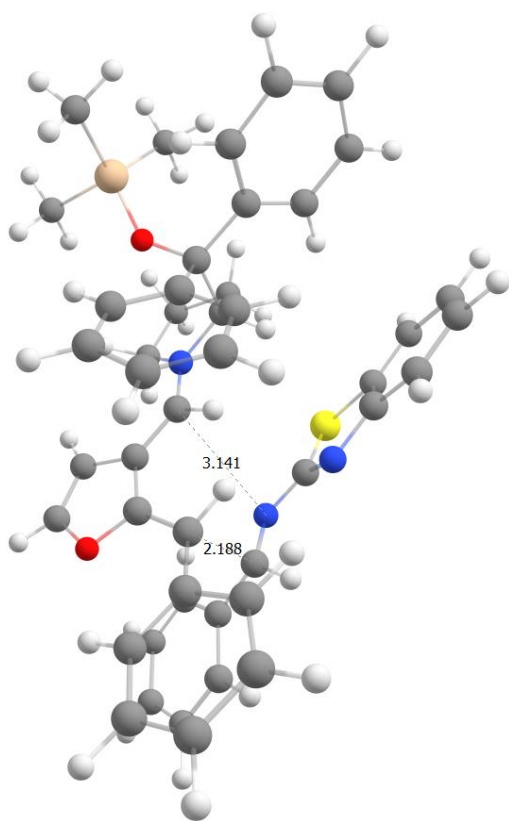

|    |              |              |              |
|----|--------------|--------------|--------------|
| C  | -1.165913000 | -2.235320000 | -2.066577000 |
| C  | -2.772471000 | -0.400746000 | -2.321065000 |
| C  | -2.455141000 | -1.828631000 | -2.789296000 |
| H  | -0.318263000 | -2.369433000 | -2.755449000 |
| H  | -1.292206000 | -3.163914000 | -1.488068000 |
| H  | -3.850034000 | -0.247431000 | -2.189162000 |
| H  | -2.421546000 | 0.337224000  | -3.058072000 |
| H  | -3.269299000 | -2.514509000 | -2.525945000 |
| H  | -2.330707000 | -1.875249000 | -3.879237000 |
| N  | -0.865317000 | -1.122221000 | -1.170838000 |
| C  | -2.791351000 | -0.480857000 | 0.292140000  |
| C  | -1.806592000 | -0.441034000 | 1.471124000  |
| C  | -1.341977000 | -1.619648000 | 2.055015000  |
| C  | -1.288294000 | 0.783760000  | 1.912475000  |
| C  | -0.361361000 | -1.579841000 | 3.049304000  |
| H  | -1.738851000 | -2.575228000 | 1.707334000  |
| C  | -0.303929000 | 0.824676000  | 2.896842000  |
| H  | -1.646282000 | 1.718597000  | 1.470737000  |
| C  | 0.167673000  | -0.360467000 | 3.466761000  |
| H  | -0.000002000 | -2.513390000 | 3.488326000  |
| H  | 0.099468000  | 1.788053000  | 3.220185000  |
| H  | 0.947897000  | -0.329029000 | 4.231686000  |
| C  | -3.884211000 | 0.570874000  | 0.544473000  |
| C  | -4.612780000 | 0.470155000  | 1.738115000  |
| C  | -4.175575000 | 1.631942000  | -0.316554000 |
| C  | -5.634049000 | 1.364531000  | 2.040029000  |
| H  | -4.359867000 | -0.315612000 | 2.453501000  |
| C  | -5.193277000 | 2.540557000  | -0.012755000 |
| H  | -3.607536000 | 1.786518000  | -1.234120000 |
| C  | -5.935096000 | 2.403994000  | 1.156907000  |
| H  | -6.189071000 | 1.258177000  | 2.975685000  |
| H  | -5.399448000 | 3.362534000  | -0.702960000 |
| H  | -6.733163000 | 3.113266000  | 1.390604000  |
| O  | -3.311540000 | -1.778077000 | 0.170697000  |
| Si | -4.789640000 | -2.599510000 | 0.205697000  |
| C  | -6.047859000 | -1.781283000 | -0.916399000 |

|   |              |              |              |
|---|--------------|--------------|--------------|
| H | -6.983596000 | -2.363741000 | -0.905180000 |
| H | -6.280571000 | -0.758631000 | -0.580711000 |
| H | -5.693659000 | -1.731737000 | -1.957776000 |
| C | -5.477895000 | -2.770209000 | 1.944548000  |
| H | -6.057861000 | -1.891963000 | 2.262519000  |
| H | -6.147714000 | -3.645226000 | 1.975036000  |
| H | -4.671087000 | -2.939298000 | 2.675432000  |
| C | -4.322587000 | -4.306713000 | -0.406439000 |
| H | -3.565541000 | -4.753375000 | 0.257947000  |
| H | -5.205195000 | -4.966267000 | -0.408523000 |
| H | -3.910529000 | -4.285813000 | -1.426563000 |
| C | -1.989995000 | -0.190391000 | -1.018029000 |
| H | -1.585713000 | 0.829504000  | -0.948474000 |
| C | 0.282777000  | -0.943701000 | -0.547968000 |
| H | 0.349124000  | 0.003229000  | -0.009225000 |
| C | 1.382546000  | -1.794458000 | -0.443396000 |
| C | 2.541365000  | -1.395745000 | 0.285835000  |
| C | 1.629735000  | -3.172779000 | -0.842699000 |
| O | 3.399337000  | -2.434054000 | 0.320916000  |
| C | 2.841157000  | -3.492346000 | -0.352850000 |
| H | 0.981093000  | -3.836694000 | -1.407477000 |
| H | 3.442045000  | -4.397712000 | -0.384389000 |
| C | 2.870981000  | -0.136948000 | 0.803328000  |
| H | 2.020784000  | 0.546962000  | 0.857934000  |
| C | 3.913612000  | 0.162211000  | 1.793225000  |
| C | 3.869622000  | 1.428750000  | 2.410453000  |
| C | 4.974191000  | -0.696493000 | 2.136633000  |
| C | 4.837019000  | 1.822031000  | 3.329602000  |
| H | 3.055268000  | 2.112715000  | 2.151067000  |
| C | 5.938800000  | -0.301681000 | 3.063478000  |
| H | 5.045496000  | -1.679933000 | 1.672987000  |
| C | 5.880901000  | 0.956107000  | 3.663616000  |
| H | 4.774349000  | 2.811129000  | 3.791652000  |
| H | 6.750892000  | -0.989645000 | 3.315127000  |
| H | 6.641675000  | 1.259962000  | 4.387245000  |
| C | 0.076327000  | 3.209088000  | -0.660406000 |
| C | -0.599620000 | 3.103852000  | -1.899365000 |
| C | -1.771720000 | 3.815334000  | -2.160597000 |
| C | -2.281546000 | 4.640202000  | -1.161457000 |
| C | -1.629486000 | 4.748235000  | 0.076528000  |
| C | -0.458875000 | 4.042676000  | 0.333535000  |
| C | 1.461820000  | 1.760955000  | -1.626887000 |
| H | -2.279014000 | 3.724816000  | -3.124304000 |
| H | -3.199362000 | 5.204385000  | -1.343546000 |
| H | -2.046550000 | 5.398350000  | 0.849861000  |
| H | 0.053454000  | 4.123855000  | 1.295168000  |
| N | 2.454039000  | 0.892159000  | -1.881636000 |
| N | 1.223031000  | 2.450419000  | -0.538995000 |
| S | 0.268353000  | 1.992848000  | -2.925695000 |
| C | 3.486918000  | 0.862433000  | -1.042521000 |
| H | 3.690936000  | 1.737144000  | -0.407063000 |
| C | 4.662292000  | 0.041962000  | -1.409766000 |
| C | 4.539291000  | -0.998303000 | -2.342188000 |
| C | 5.908080000  | 0.280617000  | -0.815698000 |
| C | 5.634924000  | -1.794039000 | -2.660493000 |
| H | 3.565299000  | -1.168916000 | -2.807000000 |
| C | 7.007617000  | -0.515875000 | -1.137369000 |
| H | 6.015129000  | 1.097327000  | -0.096531000 |
| C | 6.872673000  | -1.557571000 | -2.054870000 |
| H | 5.525494000  | -2.605042000 | -3.385613000 |
| H | 7.974929000  | -0.322643000 | -0.666281000 |
| H | 7.733532000  | -2.183827000 | -2.303909000 |



dr-INT1

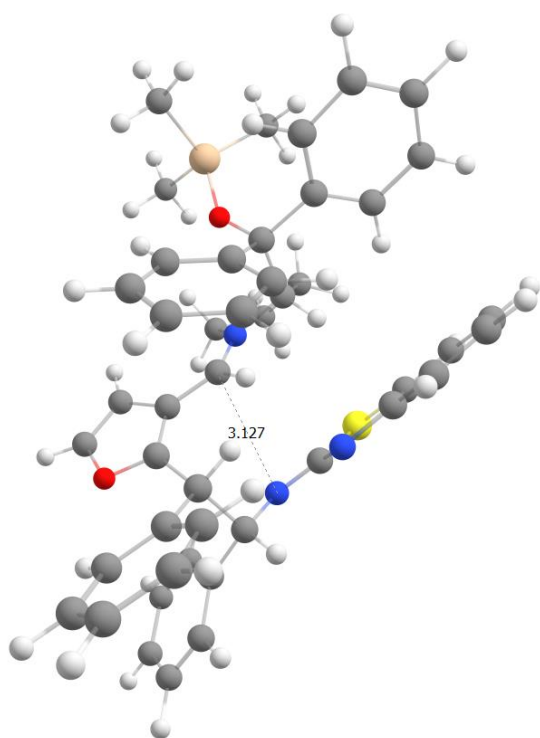

|    |              |              |              |
|----|--------------|--------------|--------------|
| C  | -1.171372000 | -2.015922000 | -2.240448000 |
| C  | -2.790813000 | -0.212758000 | -2.356149000 |
| C  | -2.022159000 | -1.220959000 | -3.223835000 |
| H  | -0.239341000 | -2.395348000 | -2.676119000 |
| H  | -1.725518000 | -2.843647000 | -1.774231000 |
| H  | -3.806204000 | -0.569340000 | -2.142287000 |
| H  | -2.880030000 | 0.756682000  | -2.864255000 |
| H  | -2.685021000 | -1.871330000 | -3.809799000 |
| H  | -1.360671000 | -0.688978000 | -3.923274000 |
| N  | -0.867688000 | -1.011649000 | -1.219486000 |
| C  | -2.790055000 | -0.454484000 | 0.247557000  |
| C  | -1.810652000 | -0.465843000 | 1.430921000  |
| C  | -1.331912000 | -1.667712000 | 1.954008000  |
| C  | -1.307640000 | 0.741833000  | 1.933343000  |
| C  | -0.347899000 | -1.666898000 | 2.946032000  |
| H  | -1.720471000 | -2.609083000 | 1.561301000  |
| C  | -0.319476000 | 0.743461000  | 2.914116000  |
| H  | -1.674014000 | 1.693780000  | 1.537489000  |
| C  | 0.169668000  | -0.463780000 | 3.420704000  |
| H  | 0.024188000  | -2.616951000 | 3.337982000  |
| H  | 0.074751000  | 1.693997000  | 3.283044000  |
| H  | 0.952527000  | -0.461933000 | 4.183459000  |
| C  | -3.910051000 | 0.548494000  | 0.557820000  |
| C  | -4.631790000 | 0.359896000  | 1.745422000  |
| C  | -4.239584000 | 1.636012000  | -0.252328000 |
| C  | -5.679125000 | 1.205192000  | 2.093275000  |
| H  | -4.357049000 | -0.458208000 | 2.415891000  |
| C  | -5.285864000 | 2.494421000  | 0.098089000  |
| H  | -3.680148000 | 1.850340000  | -1.162941000 |
| C  | -6.015967000 | 2.277193000  | 1.262544000  |
| H  | -6.229686000 | 1.034108000  | 3.021782000  |
| H  | -5.522401000 | 3.341406000  | -0.550896000 |
| H  | -6.835242000 | 2.948265000  | 1.532701000  |
| O  | -3.275552000 | -1.749866000 | 0.031840000  |
| Si | -4.723712000 | -2.627843000 | -0.000117000 |
| C  | -6.154154000 | -1.656264000 | -0.722318000 |
| H  | -7.035897000 | -2.316514000 | -0.769949000 |
| H  | -6.419167000 | -0.779250000 | -0.113340000 |
| H  | -5.937159000 | -1.315722000 | -1.746813000 |

|   |              |              |              |
|---|--------------|--------------|--------------|
| C | -5.129551000 | -3.243293000 | 1.722371000  |
| H | -5.480047000 | -2.438984000 | 2.385593000  |
| H | -5.925069000 | -4.003901000 | 1.665138000  |
| H | -4.245596000 | -3.710553000 | 2.184331000  |
| C | -4.314408000 | -4.079756000 | -1.108601000 |
| H | -3.452157000 | -4.643694000 | -0.719564000 |
| H | -5.172204000 | -4.768389000 | -1.170165000 |
| H | -4.074962000 | -3.743416000 | -2.129814000 |
| C | -1.992611000 | -0.068630000 | -1.046767000 |
| H | -1.572512000 | 0.938815000  | -0.923808000 |
| C | 0.240269000  | -0.882100000 | -0.562357000 |
| H | 0.324670000  | 0.045293000  | 0.010929000  |
| C | 1.326168000  | -1.799166000 | -0.462728000 |
| C | 2.522044000  | -1.408244000 | 0.122332000  |
| C | 1.463473000  | -3.206508000 | -0.766051000 |
| O | 3.341894000  | -2.456575000 | 0.176029000  |
| C | 2.705196000  | -3.543202000 | -0.350376000 |
| H | 0.728318000  | -3.880879000 | -1.197947000 |
| H | 3.267822000  | -4.472981000 | -0.343556000 |
| C | 2.958611000  | -0.051993000 | 0.537288000  |
| H | 2.042963000  | 0.496574000  | 0.798866000  |
| C | 3.860739000  | 0.048293000  | 1.749295000  |
| C | 3.606155000  | 1.096208000  | 2.645954000  |
| C | 4.956822000  | -0.787940000 | 1.996047000  |
| C | 4.410520000  | 1.299870000  | 3.764744000  |
| H | 2.761973000  | 1.765012000  | 2.451845000  |
| C | 5.761203000  | -0.588191000 | 3.119360000  |
| H | 5.188904000  | -1.600603000 | 1.307190000  |
| C | 5.492462000  | 0.452683000  | 4.007528000  |
| H | 4.188751000  | 2.122372000  | 4.449889000  |
| H | 6.610090000  | -1.253665000 | 3.297965000  |
| H | 6.125808000  | 0.605251000  | 4.885342000  |
| C | 0.110246000  | 3.214793000  | -0.470191000 |
| C | -0.549873000 | 3.158608000  | -1.727773000 |
| C | -1.719621000 | 3.868582000  | -1.981331000 |
| C | -2.264491000 | 4.656554000  | -0.964064000 |
| C | -1.633979000 | 4.721355000  | 0.283873000  |
| C | -0.459773000 | 4.012989000  | 0.536246000  |
| C | 1.535096000  | 1.783537000  | -1.457592000 |
| H | -2.206059000 | 3.807150000  | -2.958711000 |
| H | -3.184319000 | 5.218048000  | -1.144897000 |
| H | -2.067888000 | 5.337460000  | 1.076397000  |
| H | 0.029691000  | 4.065258000  | 1.512315000  |
| N | 2.495524000  | 0.949236000  | -1.719571000 |
| N | 1.245389000  | 2.456557000  | -0.339690000 |
| S | 0.340640000  | 2.089814000  | -2.790127000 |
| C | 3.501424000  | 0.778774000  | -0.710403000 |
| H | 3.785180000  | 1.747382000  | -0.256454000 |
| C | 4.743521000  | 0.131464000  | -1.291942000 |
| C | 4.628377000  | -0.861888000 | -2.271819000 |
| C | 6.019082000  | 0.482513000  | -0.839453000 |
| C | 5.758633000  | -1.505801000 | -2.771130000 |
| H | 3.632560000  | -1.114186000 | -2.645030000 |
| C | 7.155052000  | -0.156144000 | -1.340714000 |
| H | 6.125349000  | 1.266695000  | -0.083812000 |
| C | 7.027697000  | -1.156512000 | -2.303984000 |
| H | 5.649198000  | -2.281642000 | -3.534083000 |
| H | 8.145474000  | 0.133510000  | -0.979342000 |
| H | 7.916619000  | -1.656392000 | -2.697975000 |

# alt-RC

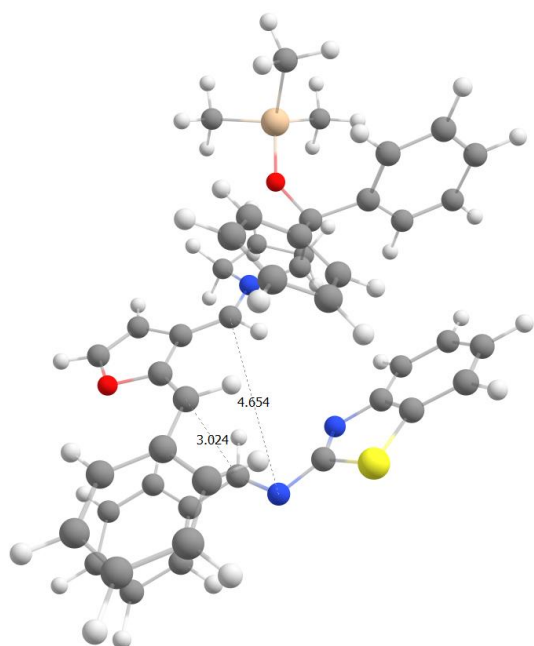

|    |              |              |              |
|----|--------------|--------------|--------------|
| C  | -1.510065000 | -2.596867000 | -2.083349000 |
| C  | -3.034568000 | -0.753774000 | -2.517525000 |
| C  | -2.852298000 | -2.258781000 | -2.732314000 |
| H  | -0.724430000 | -2.776446000 | -2.835919000 |
| H  | -1.573994000 | -3.493502000 | -1.444174000 |
| H  | -4.093552000 | -0.490456000 | -2.415321000 |
| H  | -2.634928000 | -0.187449000 | -3.373048000 |
| H  | -3.661900000 | -2.815411000 | -2.245623000 |
| H  | -2.866283000 | -2.527215000 | -3.797375000 |
| N  | -1.157824000 | -1.424478000 | -1.295542000 |
| C  | -3.007593000 | -0.417948000 | 0.076453000  |
| C  | -2.017964000 | -0.175290000 | 1.227719000  |
| C  | -1.628559000 | -1.210284000 | 2.076826000  |
| C  | -1.452006000 | 1.094523000  | 1.404467000  |
| C  | -0.687212000 | -0.984894000 | 3.084909000  |
| H  | -2.062329000 | -2.202028000 | 1.936597000  |
| C  | -0.509202000 | 1.319770000  | 2.404333000  |
| H  | -1.750250000 | 1.921006000  | 0.752143000  |
| C  | -0.123410000 | 0.278100000  | 3.251292000  |
| H  | -0.389955000 | -1.807823000 | 3.740111000  |
| H  | -0.072295000 | 2.315234000  | 2.520863000  |
| H  | 0.621302000  | 0.451992000  | 4.032349000  |
| C  | -4.080678000 | 0.683312000  | 0.159118000  |
| C  | -4.768006000 | 0.819653000  | 1.374576000  |
| C  | -4.398308000 | 1.566540000  | -0.875100000 |
| C  | -5.775273000 | 1.764714000  | 1.535993000  |
| H  | -4.492774000 | 0.181608000  | 2.217511000  |
| C  | -5.403467000 | 2.525079000  | -0.716165000 |
| H  | -3.860927000 | 1.538517000  | -1.822043000 |
| C  | -6.104932000 | 2.619809000  | 0.481762000  |
| H  | -6.296699000 | 1.843210000  | 2.493478000  |
| H  | -5.631838000 | 3.204345000  | -1.541654000 |
| H  | -6.892703000 | 3.367650000  | 0.603690000  |
| O  | -3.564721000 | -1.700432000 | 0.204375000  |
| Si | -5.058209000 | -2.459227000 | 0.419965000  |
| C  | -6.339563000 | -1.804393000 | -0.781480000 |
| H  | -7.277416000 | -2.371443000 | -0.664426000 |
| H  | -6.560197000 | -0.741613000 | -0.596463000 |
| H  | -6.007610000 | -1.912727000 | -1.825774000 |
| C  | -5.682412000 | -2.329593000 | 2.186514000  |
| H  | -6.190941000 | -1.377543000 | 2.394878000  |
| H  | -6.404741000 | -3.142569000 | 2.367449000  |
| H  | -4.855951000 | -2.448686000 | 2.905257000  |

|   |              |              |              |
|---|--------------|--------------|--------------|
| C | -4.664466000 | -4.259678000 | 0.083013000  |
| H | -3.908603000 | -4.623594000 | 0.797198000  |
| H | -5.569402000 | -4.876562000 | 0.203169000  |
| H | -4.275703000 | -4.420309000 | -0.933823000 |
| C | -2.207210000 | -0.401549000 | -1.268909000 |
| H | -1.739609000 | 0.590814000  | -1.366230000 |
| C | 0.026142000  | -1.281952000 | -0.674913000 |
| H | 0.160025000  | -0.304687000 | -0.204720000 |
| C | 1.060332000  | -2.175829000 | -0.546033000 |
| C | 2.265230000  | -1.878140000 | 0.241741000  |
| C | 1.281671000  | -3.534671000 | -1.052282000 |
| O | 3.100640000  | -2.959072000 | 0.146111000  |
| C | 2.489901000  | -3.921489000 | -0.620927000 |
| H | 0.623756000  | -4.136268000 | -1.672206000 |
| H | 3.061715000  | -4.835847000 | -0.764205000 |
| C | 2.593819000  | -0.780608000 | 0.972352000  |
| H | 1.840102000  | 0.010239000  | 0.993547000  |
| C | 3.823419000  | -0.484344000 | 1.700144000  |
| C | 3.961041000  | 0.800704000  | 2.266244000  |
| C | 4.901015000  | -1.380488000 | 1.859475000  |
| C | 5.116258000  | 1.178778000  | 2.944099000  |
| H | 3.142542000  | 1.517540000  | 2.149528000  |
| C | 6.054175000  | -0.999992000 | 2.543491000  |
| H | 4.834448000  | -2.381312000 | 1.434222000  |
| C | 6.175193000  | 0.279439000  | 3.088240000  |
| H | 5.191289000  | 2.186653000  | 3.362188000  |
| H | 6.873863000  | -1.716948000 | 2.647702000  |
| H | 7.083684000  | 0.573396000  | 3.620515000  |
| C | 0.141682000  | 3.065523000  | -1.450201000 |
| C | 0.309346000  | 3.835778000  | -0.278386000 |
| C | -0.712414000 | 4.651719000  | 0.215490000  |
| C | -1.909157000 | 4.698815000  | -0.489938000 |
| C | -2.081675000 | 3.953356000  | -1.669247000 |
| C | -1.070524000 | 3.135419000  | -2.153224000 |
| C | 2.205938000  | 2.451475000  | -0.970831000 |
| H | -0.574621000 | 5.234883000  | 1.128664000  |
| H | -2.724881000 | 5.328015000  | -0.125662000 |
| H | -3.028265000 | 4.017874000  | -2.210399000 |
| H | -1.196049000 | 2.549880000  | -3.067028000 |
| N | 3.448219000  | 1.854012000  | -1.014501000 |
| N | 1.231046000  | 2.292411000  | -1.806425000 |
| S | 1.911148000  | 3.575878000  | 0.348177000  |
| C | 3.517562000  | 0.674819000  | -1.512513000 |
| H | 2.613157000  | 0.163683000  | -1.883484000 |
| C | 4.775662000  | -0.069000000 | -1.611783000 |
| C | 5.981389000  | 0.466446000  | -1.134618000 |
| C | 4.756014000  | -1.360090000 | -2.154468000 |
| C | 7.149869000  | -0.283549000 | -1.201294000 |
| H | 5.980270000  | 1.468649000  | -0.699796000 |
| C | 5.927733000  | -2.111089000 | -2.219520000 |
| H | 3.811478000  | -1.778020000 | -2.516318000 |
| C | 7.123206000  | -1.573516000 | -1.741269000 |
| H | 8.086909000  | 0.131181000  | -0.821437000 |
| H | 5.907339000  | -3.120048000 | -2.638556000 |
| H | 8.042347000  | -2.163811000 | -1.785360000 |

# alt-TS1

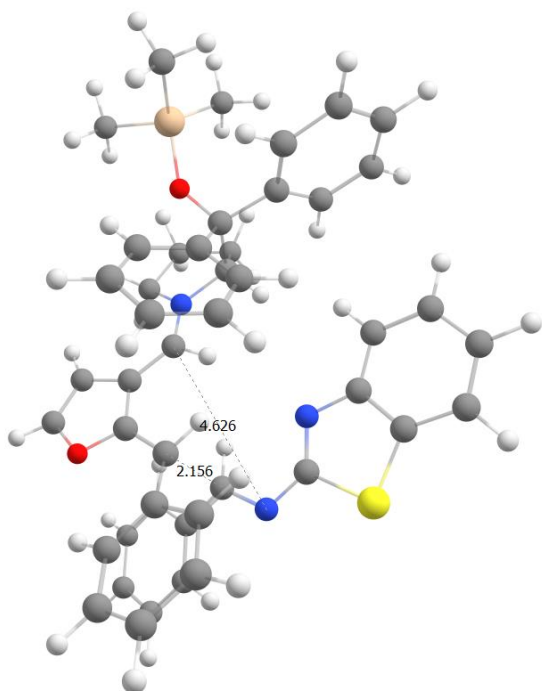

|    |              |              |              |
|----|--------------|--------------|--------------|
| C  | -1.694441000 | -2.966517000 | -1.685560000 |
| C  | -3.036766000 | -1.094753000 | -2.515889000 |
| C  | -2.947941000 | -2.627380000 | -2.500925000 |
| H  | -0.895599000 | -3.397696000 | -2.306876000 |
| H  | -1.907660000 | -3.666603000 | -0.862237000 |
| H  | -4.076760000 | -0.750009000 | -2.483864000 |
| H  | -2.579974000 | -0.687187000 | -3.430180000 |
| H  | -3.835273000 | -3.061344000 | -2.026204000 |
| H  | -2.883171000 | -3.037402000 | -3.517475000 |
| N  | -1.232227000 | -1.686263000 | -1.153849000 |
| C  | -3.061510000 | -0.403208000 | 0.003119000  |
| C  | -2.094935000 | -0.309590000 | 1.196020000  |
| C  | -1.839527000 | -1.430338000 | 1.989308000  |
| C  | -1.380782000 | 0.867968000  | 1.449488000  |
| C  | -0.874948000 | -1.383779000 | 2.997990000  |
| H  | -2.393257000 | -2.351781000 | 1.800508000  |
| C  | -0.414374000 | 0.916255000  | 2.451896000  |
| H  | -1.572771000 | 1.761287000  | 0.851359000  |
| C  | -0.152309000 | -0.214325000 | 3.227593000  |
| H  | -0.681017000 | -2.274457000 | 3.601267000  |
| H  | 0.139952000  | 1.842975000  | 2.623258000  |
| H  | 0.614188000  | -0.180921000 | 4.006170000  |
| C  | -3.902704000 | 0.884420000  | -0.072735000 |
| C  | -4.533173000 | 1.324004000  | 1.099765000  |
| C  | -4.083164000 | 1.640224000  | -1.236220000 |
| C  | -5.345190000 | 2.454016000  | 1.106122000  |
| H  | -4.369401000 | 0.779323000  | 2.032240000  |
| C  | -4.891178000 | 2.779973000  | -1.233895000 |
| H  | -3.593910000 | 1.366986000  | -2.171521000 |
| C  | -5.532158000 | 3.186942000  | -0.066863000 |
| H  | -5.824876000 | 2.770846000  | 2.035747000  |
| H  | -5.012709000 | 3.351499000  | -2.157408000 |
| H  | -6.163805000 | 4.078875000  | -0.066355000 |
| O  | -3.860959000 | -1.547838000 | 0.154576000  |
| Si | -5.482443000 | -1.959720000 | 0.414012000  |
| C  | -6.574439000 | -1.248564000 | -0.932676000 |
| H  | -7.616559000 | -1.569598000 | -0.771995000 |
| H  | -6.554007000 | -0.147443000 | -0.929049000 |
| H  | -6.261964000 | -1.598761000 | -1.929015000 |
| C  | -6.103906000 | -1.448305000 | 2.109155000  |
| H  | -6.433485000 | -0.400339000 | 2.144646000  |
| H  | -6.965923000 | -2.082256000 | 2.374513000  |

|   |              |              |              |
|---|--------------|--------------|--------------|
| H | -5.327445000 | -1.597469000 | 2.876417000  |
| C | -5.441120000 | -3.830246000 | 0.342601000  |
| H | -4.777457000 | -4.226659000 | 1.127546000  |
| H | -6.449064000 | -4.242246000 | 0.509980000  |
| H | -5.079796000 | -4.200952000 | -0.628730000 |
| C | -2.222236000 | -0.614810000 | -1.306034000 |
| H | -1.674525000 | 0.314824000  | -1.516766000 |
| C | -0.051967000 | -1.467056000 | -0.609126000 |
| H | 0.145804000  | -0.413571000 | -0.386026000 |
| C | 0.953101000  | -2.376030000 | -0.281484000 |
| C | 2.156119000  | -1.943901000 | 0.359730000  |
| C | 1.069565000  | -3.825162000 | -0.384495000 |
| O | 2.922295000  | -3.023296000 | 0.589611000  |
| C | 2.263356000  | -4.144264000 | 0.144434000  |
| H | 0.354913000  | -4.532348000 | -0.795515000 |
| H | 2.789849000  | -5.084882000 | 0.284185000  |
| C | 2.592844000  | -0.646406000 | 0.668508000  |
| H | 1.776883000  | 0.080816000  | 0.667775000  |
| C | 3.680462000  | -0.294969000 | 1.588485000  |
| C | 3.657600000  | 0.994695000  | 2.154173000  |
| C | 4.779310000  | -1.121886000 | 1.889612000  |
| C | 4.677098000  | 1.439098000  | 2.990879000  |
| H | 2.815443000  | 1.656044000  | 1.929880000  |
| C | 5.796447000  | -0.676455000 | 2.733082000  |
| H | 4.840158000  | -2.120257000 | 1.456894000  |
| C | 5.754949000  | 0.603150000  | 3.288045000  |
| H | 4.627918000  | 2.445892000  | 3.414881000  |
| H | 6.637225000  | -1.340213000 | 2.953704000  |
| H | 6.556198000  | 0.946103000  | 3.947903000  |
| C | 0.552203000  | 3.212897000  | -0.900919000 |
| C | 1.311849000  | 4.362031000  | -0.576486000 |
| C | 0.714142000  | 5.606760000  | -0.372651000 |
| C | -0.669105000 | 5.709615000  | -0.500577000 |
| C | -1.436085000 | 4.586234000  | -0.844183000 |
| C | -0.836195000 | 3.349533000  | -1.051913000 |
| C | 2.558027000  | 2.247874000  | -0.911090000 |
| H | 1.318715000  | 6.481006000  | -0.119002000 |
| H | -1.156271000 | 6.674678000  | -0.341260000 |
| H | -2.520093000 | 4.680109000  | -0.953000000 |
| H | -1.435900000 | 2.483102000  | -1.334845000 |
| N | 3.574546000  | 1.377182000  | -1.011693000 |
| N | 1.269364000  | 2.043588000  | -1.054967000 |
| S | 2.996692000  | 3.924023000  | -0.509838000 |
| C | 3.263775000  | 0.102658000  | -1.238646000 |
| H | 2.281518000  | -0.146463000 | -1.672496000 |
| C | 4.351907000  | -0.846019000 | -1.566120000 |
| C | 5.682785000  | -0.560736000 | -1.234207000 |
| C | 4.055395000  | -2.054889000 | -2.210939000 |
| C | 6.694414000  | -1.470658000 | -1.534153000 |
| H | 5.907089000  | 0.387502000  | -0.741640000 |
| C | 5.066336000  | -2.964065000 | -2.512501000 |
| H | 3.017739000  | -2.282946000 | -2.475032000 |
| C | 6.389496000  | -2.674707000 | -2.171810000 |
| H | 7.729435000  | -1.239063000 | -1.268910000 |
| H | 4.821364000  | -3.901945000 | -3.017941000 |
| H | 7.184015000  | -3.387961000 | -2.406989000 |

# alt-INT1

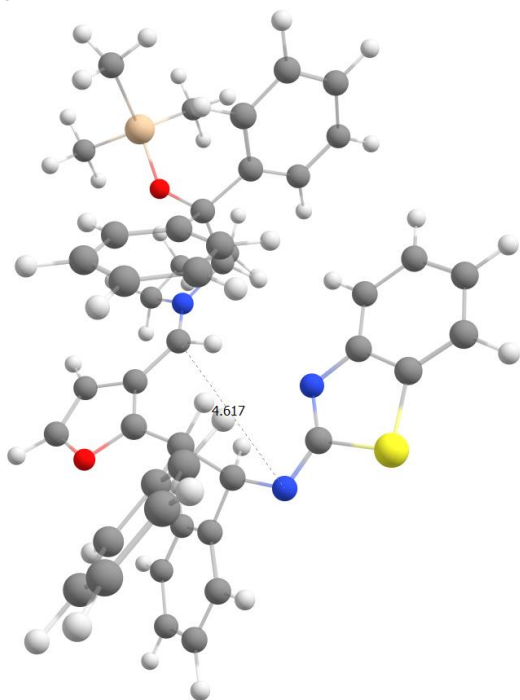

|    |              |              |              |
|----|--------------|--------------|--------------|
| C  | -1.718940000 | -2.848875000 | -1.806076000 |
| C  | -3.073780000 | -0.952115000 | -2.583014000 |
| C  | -2.938666000 | -2.481842000 | -2.659555000 |
| H  | -0.917318000 | -3.319665000 | -2.390170000 |
| H  | -1.978376000 | -3.505370000 | -0.961879000 |
| H  | -4.122009000 | -0.644542000 | -2.498241000 |
| H  | -2.658946000 | -0.478800000 | -3.484859000 |
| H  | -3.834747000 | -2.973328000 | -2.264697000 |
| H  | -2.805869000 | -2.817418000 | -3.696193000 |
| N  | -1.223860000 | -1.568432000 | -1.286493000 |
| C  | -3.044773000 | -0.411012000 | -0.024654000 |
| C  | -2.040723000 | -0.354520000 | 1.137580000  |
| C  | -1.741786000 | -1.503924000 | 1.873699000  |
| C  | -1.343630000 | 0.826623000  | 1.419533000  |
| C  | -0.753222000 | -1.479517000 | 2.859710000  |
| H  | -2.282918000 | -2.427762000 | 1.660364000  |
| C  | -0.358337000 | 0.852980000  | 2.403536000  |
| H  | -1.562601000 | 1.738568000  | 0.858409000  |
| C  | -0.053776000 | -0.303432000 | 3.124339000  |
| H  | -0.525489000 | -2.390197000 | 3.419605000  |
| H  | 0.175519000  | 1.785634000  | 2.604082000  |
| H  | 0.727078000  | -0.284605000 | 3.888868000  |
| C  | -3.929876000 | 0.848283000  | 0.002706000  |
| C  | -4.531173000 | 1.193544000  | 1.221095000  |
| C  | -4.184587000 | 1.658661000  | -1.108483000 |
| C  | -5.390059000 | 2.283572000  | 1.320838000  |
| H  | -4.307519000 | 0.605715000  | 2.114199000  |
| C  | -5.041426000 | 2.757717000  | -1.012037000 |
| H  | -3.718082000 | 1.462804000  | -2.074453000 |
| C  | -5.655260000 | 3.069125000  | 0.198057000  |
| H  | -5.845982000 | 2.526744000  | 2.283926000  |
| H  | -5.224323000 | 3.373335000  | -1.896198000 |
| H  | -6.326094000 | 3.928769000  | 0.271129000  |
| O  | -3.797893000 | -1.589911000 | 0.073622000  |
| Si | -5.393352000 | -2.074000000 | 0.387152000  |
| C  | -6.583599000 | -1.272274000 | -0.816682000 |
| H  | -7.598729000 | -1.666983000 | -0.647258000 |
| H  | -6.618081000 | -0.179240000 | -0.688137000 |
| H  | -6.307152000 | -1.490745000 | -1.860151000 |
| C  | -5.907646000 | -1.743760000 | 2.160557000  |
| H  | -6.254911000 | -0.713206000 | 2.320601000  |
| H  | -6.736314000 | -2.422798000 | 2.420179000  |

|   |              |              |              |
|---|--------------|--------------|--------------|
| H | -5.076917000 | -1.944824000 | 2.855605000  |
| C | -5.307647000 | -3.925782000 | 0.127092000  |
| H | -4.572997000 | -4.375244000 | 0.814089000  |
| H | -6.288269000 | -4.384793000 | 0.330496000  |
| H | -5.019670000 | -4.187829000 | -0.902309000 |
| C | -2.243854000 | -0.510494000 | -1.371974000 |
| H | -1.718821000 | 0.439030000  | -1.537545000 |
| C | -0.049202000 | -1.345865000 | -0.782156000 |
| H | 0.178749000  | -0.291326000 | -0.573938000 |
| C | 0.961390000  | -2.299756000 | -0.470674000 |
| C | 2.176922000  | -1.894859000 | 0.077402000  |
| C | 1.006478000  | -3.748357000 | -0.510207000 |
| O | 2.911764000  | -2.968242000 | 0.342056000  |
| C | 2.213185000  | -4.087461000 | -0.008591000 |
| H | 0.246124000  | -4.445823000 | -0.848548000 |
| H | 2.713029000  | -5.035846000 | 0.169081000  |
| C | 2.713912000  | -0.527653000 | 0.308990000  |
| H | 1.834050000  | 0.102825000  | 0.503384000  |
| C | 3.634210000  | -0.363233000 | 1.501475000  |
| C | 3.402700000  | 0.721567000  | 2.357781000  |
| C | 4.734122000  | -1.190821000 | 1.762888000  |
| C | 4.228569000  | 0.969892000  | 3.451527000  |
| H | 2.561624000  | 1.389244000  | 2.153089000  |
| C | 5.562588000  | -0.946160000 | 2.859603000  |
| H | 4.952471000  | -2.033063000 | 1.105760000  |
| C | 5.313413000  | 0.131323000  | 3.708860000  |
| H | 4.022396000  | 1.823207000  | 4.103053000  |
| H | 6.414098000  | -1.605665000 | 3.047739000  |
| H | 5.964807000  | 0.319491000  | 4.566437000  |
| C | 0.541541000  | 3.198697000  | -0.897517000 |
| C | 1.240474000  | 4.382524000  | -0.534289000 |
| C | 0.597142000  | 5.605786000  | -0.379081000 |
| C | -0.782981000 | 5.679562000  | -0.592250000 |
| C | -1.488659000 | 4.534090000  | -0.974327000 |
| C | -0.839074000 | 3.310866000  | -1.135330000 |
| C | 2.588921000  | 2.279504000  | -0.773778000 |
| H | 1.163707000  | 6.496806000  | -0.094872000 |
| H | -1.302676000 | 6.632863000  | -0.468560000 |
| H | -2.566415000 | 4.591782000  | -1.153004000 |
| H | -1.399915000 | 2.430148000  | -1.453397000 |
| N | 3.605697000  | 1.474881000  | -0.806517000 |
| N | 1.285035000  | 2.050202000  | -0.994429000 |
| S | 2.936971000  | 4.003658000  | -0.348443000 |
| C | 3.304673000  | 0.095545000  | -1.030522000 |
| H | 2.491949000  | -0.033040000 | -1.773803000 |
| C | 4.509243000  | -0.685020000 | -1.521141000 |
| C | 5.810386000  | -0.278637000 | -1.209741000 |
| C | 4.332346000  | -1.853818000 | -2.271583000 |
| C | 6.908687000  | -1.036499000 | -1.615994000 |
| H | 5.941593000  | 0.646561000  | -0.645400000 |
| C | 5.427439000  | -2.615696000 | -2.678896000 |
| H | 3.320395000  | -2.172010000 | -2.545160000 |
| C | 6.720991000  | -2.210965000 | -2.346309000 |
| H | 7.919946000  | -0.708474000 | -1.359809000 |
| H | 5.269843000  | -3.526115000 | -3.263541000 |
| H | 7.581997000  | -2.805888000 | -2.662910000 |

# ent-RC

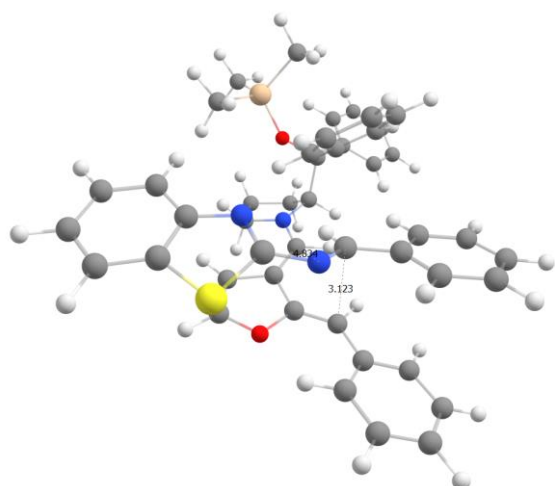

|    |              |              |              |
|----|--------------|--------------|--------------|
| C  | -1.983481000 | 1.405618000  | 2.656096000  |
| C  | -3.618355000 | -0.374564000 | 2.861973000  |
| C  | -3.432676000 | 1.131387000  | 3.077995000  |
| H  | -1.318757000 | 1.537565000  | 3.525827000  |
| H  | -1.896242000 | 2.309001000  | 2.030116000  |
| H  | -4.659786000 | -0.647115000 | 2.648291000  |
| H  | -3.304576000 | -0.932351000 | 3.757971000  |
| H  | -4.126876000 | 1.696229000  | 2.444308000  |
| H  | -3.608488000 | 1.424922000  | 4.122287000  |
| N  | -1.565101000 | 0.210837000  | 1.928473000  |
| C  | -3.353172000 | -0.652007000 | 0.306735000  |
| C  | -2.375024000 | -0.849248000 | -0.871445000 |
| C  | -1.427599000 | 0.151523000  | -1.137122000 |
| C  | -2.475303000 | -1.908072000 | -1.783260000 |
| C  | -0.639301000 | 0.115695000  | -2.284894000 |
| H  | -1.320721000 | 0.993133000  | -0.451525000 |
| C  | -1.673867000 | -1.956745000 | -2.925521000 |
| H  | -3.211278000 | -2.697707000 | -1.631337000 |
| C  | -0.759666000 | -0.939845000 | -3.188344000 |
| H  | 0.083906000  | 0.917963000  | -2.451847000 |
| H  | -1.783592000 | -2.792403000 | -3.621607000 |
| H  | -0.140907000 | -0.969977000 | -4.088898000 |
| C  | -4.442692000 | -1.737992000 | 0.323455000  |
| C  | -5.783040000 | -1.419439000 | 0.098994000  |
| C  | -4.121650000 | -3.073871000 | 0.610337000  |
| C  | -6.775581000 | -2.400737000 | 0.143054000  |
| H  | -6.063943000 | -0.385148000 | -0.094921000 |
| C  | -5.108364000 | -4.055863000 | 0.658209000  |
| H  | -3.083220000 | -3.365273000 | 0.789802000  |
| C  | -6.443471000 | -3.723787000 | 0.422364000  |
| H  | -7.817163000 | -2.121782000 | -0.036770000 |
| H  | -4.830695000 | -5.089243000 | 0.881603000  |
| H  | -7.219060000 | -4.492890000 | 0.462208000  |
| O  | -3.927026000 | 0.626789000  | 0.216589000  |
| Si | -4.405160000 | 1.708306000  | -0.995567000 |
| C  | -6.023087000 | 2.420817000  | -0.369553000 |
| H  | -6.820436000 | 1.665151000  | -0.298703000 |
| H  | -5.884837000 | 2.863456000  | 0.629856000  |
| H  | -6.372602000 | 3.216714000  | -1.046592000 |
| C  | -4.633089000 | 0.876221000  | -2.658692000 |
| H  | -3.674716000 | 0.526353000  | -3.071326000 |
| H  | -5.315989000 | 0.014943000  | -2.594553000 |
| H  | -5.064872000 | 1.602644000  | -3.366740000 |
| C  | -3.161976000 | 3.108380000  | -1.114738000 |
| H  | -2.260642000 | 2.820750000  | -1.675324000 |
| H  | -3.622548000 | 3.967322000  | -1.629387000 |
| H  | -2.854992000 | 3.439963000  | -0.109779000 |
| C  | -2.659850000 | -0.728141000 | 1.712789000  |
| H  | -2.260135000 | -1.745574000 | 1.820300000  |
| C  | -0.277399000 | -0.179137000 | 1.833250000  |

|   |              |              |              |
|---|--------------|--------------|--------------|
| H | -0.155482000 | -1.216549000 | 1.502538000  |
| C | 0.860610000  | 0.535979000  | 2.095358000  |
| C | 2.204403000  | -0.053206000 | 2.020999000  |
| C | 1.097659000  | 1.962022000  | 2.339351000  |
| O | 3.110838000  | 0.968866000  | 2.125735000  |
| C | 2.424807000  | 2.142674000  | 2.330461000  |
| H | 0.360446000  | 2.751862000  | 2.453665000  |
| H | 3.042604000  | 3.032286000  | 2.435048000  |
| C | 2.588805000  | -1.347762000 | 1.881879000  |
| H | 1.778272000  | -2.080519000 | 1.905003000  |
| C | 3.923052000  | -1.896329000 | 1.648160000  |
| C | 4.076156000  | -3.297963000 | 1.652470000  |
| C | 5.063123000  | -1.118989000 | 1.359042000  |
| C | 5.302617000  | -3.897492000 | 1.384306000  |
| H | 3.202867000  | -3.923679000 | 1.860922000  |
| C | 6.289461000  | -1.723219000 | 1.085940000  |
| H | 4.979113000  | -0.032540000 | 1.329545000  |
| C | 6.421623000  | -3.112511000 | 1.096943000  |
| H | 5.384918000  | -4.988072000 | 1.392566000  |
| H | 7.154721000  | -1.095171000 | 0.854916000  |
| H | 7.386042000  | -3.579730000 | 0.881433000  |
| C | 1.883003000  | 3.538013000  | -0.785737000 |
| C | 3.186011000  | 4.033410000  | -0.564396000 |
| C | 3.411674000  | 5.371042000  | -0.226325000 |
| C | 2.310130000  | 6.211302000  | -0.112895000 |
| C | 1.006817000  | 5.729219000  | -0.330170000 |
| C | 0.784240000  | 4.401509000  | -0.667066000 |
| C | 2.987802000  | 1.652185000  | -1.101347000 |
| H | 4.423574000  | 5.745083000  | -0.054782000 |
| H | 2.461728000  | 7.261553000  | 0.148086000  |
| H | 0.158162000  | 6.410624000  | -0.230846000 |
| H | -0.224076000 | 4.015881000  | -0.833370000 |
| N | 3.288821000  | 0.335204000  | -1.389807000 |
| N | 1.812601000  | 2.193111000  | -1.092118000 |
| S | 4.329737000  | 2.736019000  | -0.766319000 |
| C | 2.389321000  | -0.540777000 | -1.128732000 |
| H | 1.445790000  | -0.249828000 | -0.642679000 |
| C | 2.534873000  | -1.961175000 | -1.457442000 |
| C | 3.709832000  | -2.471967000 | -2.025993000 |
| C | 1.464627000  | -2.822179000 | -1.180513000 |
| C | 3.812024000  | -3.830274000 | -2.307801000 |
| H | 4.539198000  | -1.791000000 | -2.230490000 |
| C | 1.566289000  | -4.181014000 | -1.467546000 |
| H | 0.546789000  | -2.415413000 | -0.744317000 |
| C | 2.741654000  | -4.684948000 | -2.027111000 |
| H | 4.731230000  | -4.230114000 | -2.743032000 |
| H | 0.728221000  | -4.849169000 | -1.255124000 |
| H | 2.825566000  | -5.752503000 | -2.247251000 |

# ent-TS1

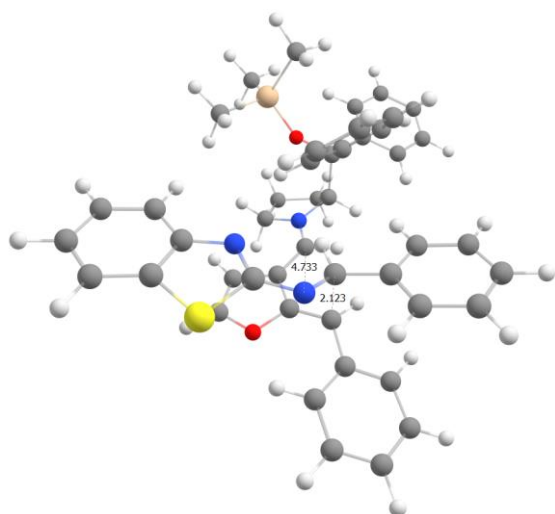

|    |              |              |              |
|----|--------------|--------------|--------------|
| C  | -2.103868000 | 1.251059000  | 2.768769000  |
| C  | -3.687312000 | -0.594858000 | 2.868381000  |
| C  | -3.528370000 | 0.892064000  | 3.211946000  |
| H  | -1.423582000 | 1.389712000  | 3.622090000  |
| H  | -2.070342000 | 2.161229000  | 2.150726000  |
| H  | -4.724035000 | -0.867449000 | 2.635287000  |
| H  | -3.359184000 | -1.222882000 | 3.710561000  |
| H  | -4.259304000 | 1.492724000  | 2.658497000  |
| H  | -3.670349000 | 1.082453000  | 4.284349000  |
| N  | -1.643734000 | 0.092217000  | 1.997838000  |
| C  | -3.415110000 | -0.598885000 | 0.291584000  |
| C  | -2.432687000 | -0.731604000 | -0.893303000 |
| C  | -1.446230000 | 0.249731000  | -1.073369000 |
| C  | -2.550983000 | -1.720513000 | -1.879330000 |
| C  | -0.617916000 | 0.250925000  | -2.193434000 |
| H  | -1.329228000 | 1.051319000  | -0.343042000 |
| C  | -1.720971000 | -1.725078000 | -3.001129000 |
| H  | -3.317959000 | -2.490419000 | -1.799227000 |
| C  | -0.752258000 | -0.738175000 | -3.166308000 |
| H  | 0.148305000  | 1.025210000  | -2.279577000 |
| H  | -1.844187000 | -2.507389000 | -3.754535000 |
| H  | -0.103071000 | -0.740965000 | -4.045535000 |
| C  | -4.541653000 | -1.643644000 | 0.203283000  |
| C  | -5.863633000 | -1.258756000 | -0.023531000 |
| C  | -4.271848000 | -3.009346000 | 0.382185000  |
| C  | -6.887626000 | -2.205770000 | -0.093752000 |
| H  | -6.105393000 | -0.202374000 | -0.132271000 |
| C  | -5.290104000 | -3.957049000 | 0.315119000  |
| H  | -3.249404000 | -3.352839000 | 0.561339000  |
| C  | -6.605934000 | -3.559135000 | 0.072748000  |
| H  | -7.913967000 | -1.876337000 | -0.275313000 |
| H  | -5.052045000 | -5.014995000 | 0.452185000  |
| H  | -7.405897000 | -4.301834000 | 0.017426000  |
| O  | -3.938833000 | 0.702711000  | 0.324247000  |
| Si | -4.349943000 | 1.917157000  | -0.789601000 |
| C  | -5.951573000 | 2.626672000  | -0.122263000 |
| H  | -6.783362000 | 1.906538000  | -0.158998000 |
| H  | -5.821469000 | 2.944086000  | 0.924684000  |
| H  | -6.246100000 | 3.510853000  | -0.709889000 |
| C  | -4.569645000 | 1.248398000  | -2.525850000 |
| H  | -3.610002000 | 0.929349000  | -2.959988000 |
| H  | -5.260061000 | 0.391090000  | -2.549568000 |
| H  | -4.988435000 | 2.041340000  | -3.166889000 |
| C  | -3.057108000 | 3.275933000  | -0.755963000 |
| H  | -2.136111000 | 2.999346000  | -1.289123000 |
| H  | -3.469179000 | 4.177223000  | -1.238481000 |
| H  | -2.792821000 | 3.541817000  | 0.279985000  |
| C  | -2.735416000 | -0.834532000 | 1.687628000  |

|   |              |              |              |
|---|--------------|--------------|--------------|
| H | -2.323018000 | -1.851477000 | 1.691700000  |
| C | -0.376216000 | -0.216021000 | 1.791417000  |
| H | -0.223214000 | -1.208897000 | 1.356681000  |
| C | 0.757428000  | 0.551167000  | 2.046053000  |
| C | 2.080495000  | 0.048887000  | 1.828819000  |
| C | 0.939095000  | 1.940403000  | 2.445590000  |
| O | 2.954880000  | 1.027841000  | 2.100638000  |
| C | 2.264095000  | 2.162012000  | 2.451088000  |
| H | 0.178443000  | 2.683691000  | 2.665536000  |
| H | 2.873645000  | 3.036318000  | 2.664097000  |
| C | 2.523329000  | -1.192503000 | 1.331830000  |
| H | 1.756346000  | -1.968340000 | 1.389605000  |
| C | 3.894033000  | -1.711866000 | 1.474229000  |
| C | 4.070652000  | -3.103187000 | 1.589172000  |
| C | 5.045503000  | -0.905750000 | 1.410509000  |
| C | 5.340375000  | -3.670239000 | 1.652320000  |
| H | 3.187161000  | -3.748477000 | 1.620739000  |
| C | 6.316645000  | -1.476733000 | 1.473957000  |
| H | 4.946757000  | 0.173347000  | 1.298173000  |
| C | 6.474129000  | -2.857398000 | 1.597010000  |
| H | 5.445133000  | -4.755017000 | 1.741889000  |
| H | 7.197272000  | -0.830262000 | 1.422004000  |
| H | 7.473269000  | -3.298271000 | 1.646257000  |
| C | 2.201031000  | 3.330549000  | -0.785421000 |
| C | 3.534386000  | 3.774580000  | -0.951481000 |
| C | 3.862002000  | 5.130707000  | -0.940861000 |
| C | 2.839577000  | 6.059977000  | -0.758941000 |
| C | 1.511841000  | 5.635216000  | -0.595326000 |
| C | 1.185895000  | 4.283389000  | -0.608635000 |
| C | 3.143836000  | 1.324161000  | -1.000958000 |
| H | 4.896727000  | 5.457296000  | -1.071178000 |
| H | 3.076013000  | 7.126868000  | -0.745014000 |
| H | 0.722533000  | 6.378403000  | -0.453574000 |
| H | 0.154545000  | 3.946164000  | -0.477323000 |
| N | 3.360971000  | 0.004329000  | -1.104399000 |
| N | 2.017565000  | 1.966783000  | -0.813507000 |
| S | 4.570261000  | 2.384247000  | -1.153277000 |
| C | 2.363615000  | -0.809599000 | -0.749819000 |
| H | 1.353176000  | -0.398008000 | -0.621456000 |
| C | 2.387487000  | -2.213612000 | -1.232321000 |
| C | 3.562481000  | -2.792012000 | -1.725069000 |
| C | 1.213256000  | -2.978450000 | -1.196972000 |
| C | 3.565078000  | -4.113385000 | -2.168551000 |
| H | 4.470605000  | -2.186051000 | -1.755701000 |
| C | 1.213779000  | -4.297797000 | -1.642584000 |
| H | 0.287927000  | -2.526920000 | -0.823475000 |
| C | 2.392599000  | -4.869924000 | -2.127277000 |
| H | 4.488953000  | -4.556127000 | -2.550438000 |
| H | 0.289382000  | -4.881045000 | -1.618187000 |
| H | 2.395203000  | -5.906024000 | -2.476272000 |

# ent-INT1

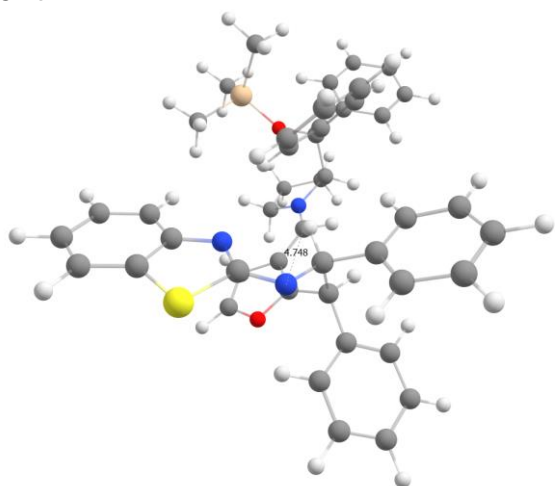

|    |              |              |              |
|----|--------------|--------------|--------------|
| C  | -2.133061000 | 0.882030000  | 2.933536000  |
| C  | -3.685662000 | -0.973238000 | 2.755902000  |
| C  | -3.565113000 | 0.462459000  | 3.278989000  |
| H  | -1.476995000 | 0.881603000  | 3.815234000  |
| H  | -2.076864000 | 1.866979000  | 2.448565000  |
| H  | -4.714274000 | -1.246364000 | 2.493179000  |
| H  | -3.333908000 | -1.690777000 | 3.512791000  |
| H  | -4.283474000 | 1.116371000  | 2.771782000  |
| H  | -3.744937000 | 0.523885000  | 4.360424000  |
| N  | -1.645661000 | -0.153534000 | 2.006488000  |
| C  | -3.381813000 | -0.584951000 | 0.193862000  |
| C  | -2.389187000 | -0.666584000 | -0.988074000 |
| C  | -1.366931000 | 0.289281000  | -1.084519000 |
| C  | -2.506721000 | -1.594733000 | -2.031610000 |
| C  | -0.498287000 | 0.320612000  | -2.173593000 |
| H  | -1.248162000 | 1.051138000  | -0.312540000 |
| C  | -1.636360000 | -1.570017000 | -3.121695000 |
| H  | -3.302415000 | -2.338544000 | -2.023492000 |
| C  | -0.628181000 | -0.612207000 | -3.200213000 |
| H  | 0.293516000  | 1.073434000  | -2.186160000 |
| H  | -1.759326000 | -2.307318000 | -3.919250000 |
| H  | 0.053212000  | -0.593379000 | -4.054439000 |
| C  | -4.589032000 | -1.519220000 | -0.006313000 |
| C  | -5.879469000 | -1.006003000 | -0.141312000 |
| C  | -4.431277000 | -2.914103000 | 0.008132000  |
| C  | -6.980836000 | -1.852047000 | -0.287544000 |
| H  | -6.040428000 | 0.070183000  | -0.109742000 |
| C  | -5.526844000 | -3.761695000 | -0.136409000 |
| H  | -3.439932000 | -3.359427000 | 0.126168000  |
| C  | -6.809866000 | -3.233583000 | -0.289607000 |
| H  | -7.979376000 | -1.419994000 | -0.392114000 |
| H  | -5.375075000 | -4.844062000 | -0.126993000 |
| H  | -7.670305000 | -3.897922000 | -0.402474000 |
| O  | -3.786964000 | 0.743061000  | 0.381564000  |
| Si | -4.182260000 | 2.079342000  | -0.596554000 |
| C  | -5.702665000 | 2.814516000  | 0.216503000  |
| H  | -6.571100000 | 2.138636000  | 0.198997000  |
| H  | -5.486860000 | 3.064817000  | 1.267607000  |
| H  | -5.989958000 | 3.744565000  | -0.299523000 |
| C  | -4.508394000 | 1.582896000  | -2.372657000 |
| H  | -3.589144000 | 1.229686000  | -2.864355000 |
| H  | -5.268011000 | 0.790466000  | -2.451640000 |
| H  | -4.874948000 | 2.462381000  | -2.926971000 |
| C  | -2.812938000 | 3.355574000  | -0.510006000 |
| H  | -1.947483000 | 3.089820000  | -1.133969000 |
| H  | -3.199430000 | 4.323847000  | -0.867613000 |
| H  | -2.465703000 | 3.494520000  | 0.526355000  |
| C  | -2.733614000 | -1.039490000 | 1.554378000  |
| H  | -2.313354000 | -2.043415000 | 1.414584000  |
| C  | -0.396803000 | -0.381516000 | 1.727323000  |

|   |              |              |              |
|---|--------------|--------------|--------------|
| H | -0.219395000 | -1.273865000 | 1.119642000  |
| C | 0.739708000  | 0.379552000  | 2.104151000  |
| C | 2.029536000  | -0.022436000 | 1.750255000  |
| C | 0.899727000  | 1.655710000  | 2.773664000  |
| O | 2.901127000  | 0.872501000  | 2.183867000  |
| C | 2.227129000  | 1.897142000  | 2.784064000  |
| H | 0.137513000  | 2.317094000  | 3.174141000  |
| H | 2.838664000  | 2.711433000  | 3.162865000  |
| C | 2.504070000  | -1.200274000 | 0.970646000  |
| H | 1.745820000  | -1.980979000 | 1.122639000  |
| C | 3.823501000  | -1.781161000 | 1.440184000  |
| C | 3.864582000  | -3.122460000 | 1.838646000  |
| C | 5.015528000  | -1.042710000 | 1.449462000  |
| C | 5.060863000  | -3.718073000 | 2.238953000  |
| H | 2.943672000  | -3.713612000 | 1.826778000  |
| C | 6.211207000  | -1.636213000 | 1.851793000  |
| H | 5.008933000  | -0.003341000 | 1.122196000  |
| C | 6.239703000  | -2.974020000 | 2.248403000  |
| H | 5.069069000  | -4.768185000 | 2.542763000  |
| H | 7.131647000  | -1.046067000 | 1.851445000  |
| H | 7.179615000  | -3.434617000 | 2.564202000  |
| C | 2.071780000  | 3.256253000  | -0.637739000 |
| C | 3.303396000  | 3.813524000  | -1.078584000 |
| C | 3.490027000  | 5.186855000  | -1.195349000 |
| C | 2.436184000  | 6.045212000  | -0.863883000 |
| C | 1.217647000  | 5.516684000  | -0.422240000 |
| C | 1.029995000  | 4.140103000  | -0.307153000 |
| C | 3.151063000  | 1.307915000  | -0.933804000 |
| H | 4.445569000  | 5.589834000  | -1.542272000 |
| H | 2.568060000  | 7.126691000  | -0.950827000 |
| H | 0.397320000  | 6.192331000  | -0.162607000 |
| H | 0.079654000  | 3.730034000  | 0.043809000  |
| N | 3.474058000  | 0.051246000  | -0.988254000 |
| N | 2.006453000  | 1.892929000  | -0.567353000 |
| S | 4.424171000  | 2.509137000  | -1.410408000 |
| C | 2.465544000  | -0.879173000 | -0.581918000 |
| H | 1.450166000  | -0.479616000 | -0.748931000 |
| C | 2.551400000  | -2.197457000 | -1.332856000 |
| C | 3.746629000  | -2.646444000 | -1.899841000 |
| C | 1.411902000  | -3.005161000 | -1.436478000 |
| C | 3.807027000  | -3.884015000 | -2.542429000 |
| H | 4.626603000  | -2.003434000 | -1.835669000 |
| C | 1.466342000  | -4.240273000 | -2.080687000 |
| H | 0.462075000  | -2.652229000 | -1.019068000 |
| C | 2.668865000  | -4.686343000 | -2.632534000 |
| H | 4.751087000  | -4.225076000 | -2.976544000 |
| H | 0.564289000  | -4.853723000 | -2.156963000 |
| H | 2.716267000  | -5.654395000 | -3.138627000 |

# TS2

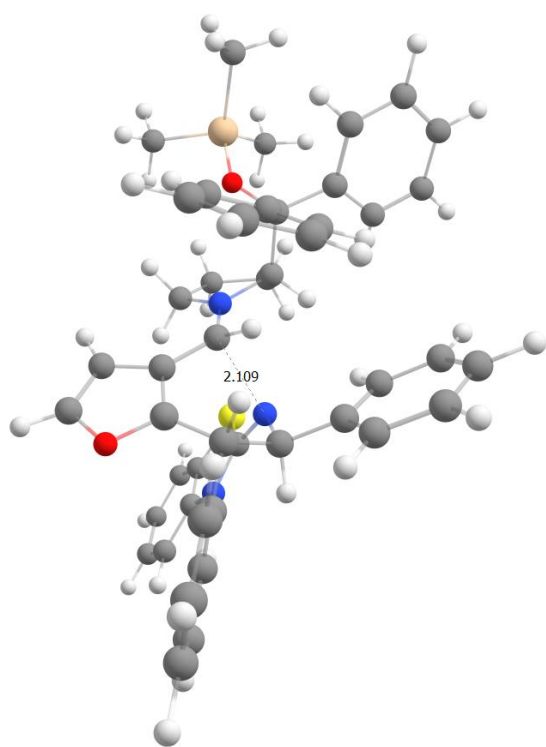

|    |              |              |              |
|----|--------------|--------------|--------------|
| C  | 0.886939000  | 2.461149000  | 0.913807000  |
| C  | 2.214071000  | 2.109775000  | -1.121816000 |
| C  | 1.826287000  | 3.164799000  | -0.074336000 |
| H  | -0.106241000 | 2.925221000  | 0.947481000  |
| H  | 1.306844000  | 2.447463000  | 1.931914000  |
| H  | 3.272838000  | 2.175292000  | -1.399455000 |
| H  | 1.623777000  | 2.245835000  | -2.040333000 |
| H  | 2.712343000  | 3.548477000  | 0.446569000  |
| H  | 1.327716000  | 4.022618000  | -0.545827000 |
| N  | 0.776685000  | 1.088699000  | 0.415096000  |
| C  | 3.037491000  | 0.012610000  | 0.195905000  |
| C  | 2.446557000  | -1.167929000 | 0.982032000  |
| C  | 2.181194000  | -1.053240000 | 2.348412000  |
| C  | 2.051593000  | -2.332683000 | 0.312838000  |
| C  | 1.510215000  | -2.071948000 | 3.028169000  |
| H  | 2.488099000  | -0.146925000 | 2.873903000  |
| C  | 1.377895000  | -3.348723000 | 0.987740000  |
| H  | 2.250810000  | -2.443493000 | -0.756233000 |
| C  | 1.098351000  | -3.218483000 | 2.349449000  |
| H  | 1.300433000  | -1.962242000 | 4.095437000  |
| H  | 1.062230000  | -4.241070000 | 0.440679000  |
| H  | 0.565321000  | -4.012072000 | 2.879556000  |
| C  | 4.061860000  | -0.523284000 | -0.817868000 |
| C  | 5.122411000  | -1.297613000 | -0.327642000 |
| C  | 3.991725000  | -0.301223000 | -2.196820000 |
| C  | 6.110549000  | -1.788755000 | -1.175433000 |
| H  | 5.164247000  | -1.534660000 | 0.738065000  |
| C  | 4.976303000  | -0.799824000 | -3.053621000 |
| H  | 3.165334000  | 0.257975000  | -2.636711000 |
| C  | 6.045538000  | -1.533385000 | -2.546617000 |
| H  | 6.930282000  | -2.383905000 | -0.764847000 |
| H  | 4.898797000  | -0.609397000 | -4.127063000 |
| H  | 6.817130000  | -1.919116000 | -3.217796000 |
| O  | 3.607668000  | 0.925380000  | 1.098077000  |
| Si | 5.079069000  | 1.689244000  | 1.429862000  |
| C  | 5.801362000  | 2.488520000  | -0.103764000 |
| H  | 6.753454000  | 2.980083000  | 0.154619000  |
| H  | 6.006993000  | 1.741084000  | -0.886196000 |
| H  | 5.128752000  | 3.253594000  | -0.521505000 |

|   |              |              |              |
|---|--------------|--------------|--------------|
| C | 6.336357000  | 0.527356000  | 2.201268000  |
| H | 6.889746000  | -0.059299000 | 1.453711000  |
| H | 7.067858000  | 1.125622000  | 2.769108000  |
| H | 5.853618000  | -0.169760000 | 2.904612000  |
| C | 4.594960000  | 2.971597000  | 2.705739000  |
| H | 4.141138000  | 2.487318000  | 3.585045000  |
| H | 5.482965000  | 3.528345000  | 3.045165000  |
| H | 3.870711000  | 3.698025000  | 2.307296000  |
| C | 1.855721000  | 0.745674000  | -0.513925000 |
| H | 1.436036000  | 0.063785000  | -1.266810000 |
| C | -0.231318000 | 0.253966000  | 0.613096000  |
| H | -0.010697000 | -0.780881000 | 0.353360000  |
| C | -1.291306000 | 0.444117000  | 1.589702000  |
| C | -2.379588000 | -0.390218000 | 1.539334000  |
| C | -1.575675000 | 1.402702000  | 2.629496000  |
| O | -3.282629000 | -0.029298000 | 2.458590000  |
| C | -2.792928000 | 1.052762000  | 3.120061000  |
| H | -0.957366000 | 2.222107000  | 2.986639000  |
| H | -3.419861000 | 1.452622000  | 3.912897000  |
| C | -2.594753000 | -1.535651000 | 0.613617000  |
| H | -1.856933000 | -2.295599000 | 0.922600000  |
| C | -3.975297000 | -2.146771000 | 0.770445000  |
| C | -4.138082000 | -3.352565000 | 1.460312000  |
| C | -5.108919000 | -1.501736000 | 0.260038000  |
| C | -5.404748000 | -3.914465000 | 1.626781000  |
| H | -3.259515000 | -3.860260000 | 1.870754000  |
| C | -6.374562000 | -2.061842000 | 0.425120000  |
| H | -4.983131000 | -0.546055000 | -0.258874000 |
| C | -6.527024000 | -3.270993000 | 1.106364000  |
| H | -5.512428000 | -4.860496000 | 2.163981000  |
| H | -7.250360000 | -1.548443000 | 0.018799000  |
| H | -7.520035000 | -3.710886000 | 1.231720000  |
| C | -4.022564000 | 2.595948000  | -1.105942000 |
| C | -3.025295000 | 3.546741000  | -1.429358000 |
| C | -3.322319000 | 4.898392000  | -1.595948000 |
| C | -4.644592000 | 5.312396000  | -1.437987000 |
| C | -5.645006000 | 4.384295000  | -1.116094000 |
| C | -5.345810000 | 3.035056000  | -0.949847000 |
| C | -2.291490000 | 1.187981000  | -1.138863000 |
| H | -2.537805000 | 5.616832000  | -1.846519000 |
| H | -4.899350000 | 6.367167000  | -1.567699000 |
| H | -6.676547000 | 4.725144000  | -0.992949000 |
| H | -6.123670000 | 2.310568000  | -0.695820000 |
| N | -1.523476000 | 0.109800000  | -1.047745000 |
| N | -3.587518000 | 1.297579000  | -0.948709000 |
| S | -1.489855000 | 2.727938000  | -1.574515000 |
| C | -2.211242000 | -1.146892000 | -0.892967000 |
| H | -3.175494000 | -1.082177000 | -1.423545000 |
| C | -1.401272000 | -2.268671000 | -1.548986000 |
| C | -0.340338000 | -1.970426000 | -2.410700000 |
| C | -1.713827000 | -3.618629000 | -1.331871000 |
| C | 0.408086000  | -2.983854000 | -3.011501000 |
| H | -0.107051000 | -0.921831000 | -2.601763000 |
| C | -0.971777000 | -4.633980000 | -1.933144000 |
| H | -2.550164000 | -3.891577000 | -0.684322000 |
| C | 0.101093000  | -4.321710000 | -2.769973000 |
| H | 1.241615000  | -2.721694000 | -3.669393000 |
| H | -1.232521000 | -5.678373000 | -1.741625000 |
| H | 0.688000000  | -5.117800000 | -3.235553000 |



# INT2

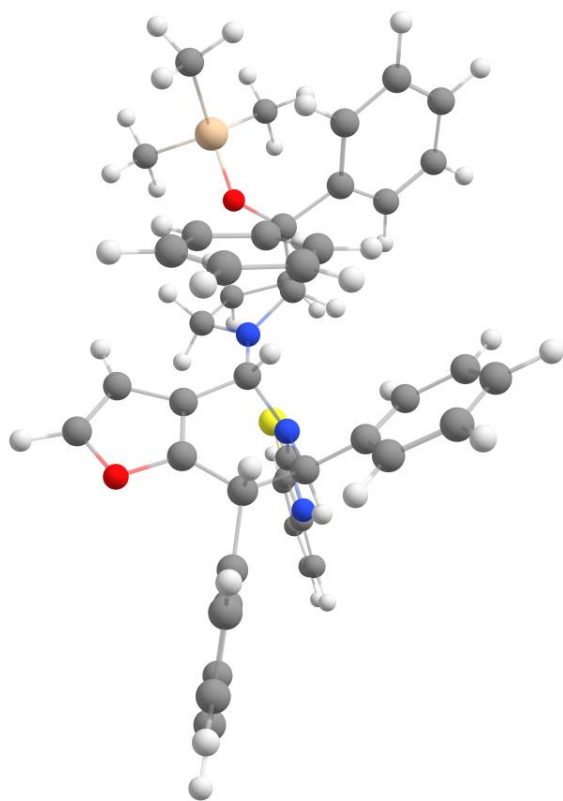

|    |              |              |              |
|----|--------------|--------------|--------------|
| C  | 0.919382000  | 1.892648000  | 1.705158000  |
| C  | 2.152284000  | 2.462448000  | -0.344746000 |
| C  | 1.774562000  | 2.993026000  | 1.052253000  |
| H  | -0.006871000 | 2.288813000  | 2.147137000  |
| H  | 1.490438000  | 1.392345000  | 2.506201000  |
| H  | 3.222782000  | 2.584129000  | -0.551023000 |
| H  | 1.599821000  | 3.003042000  | -1.127699000 |
| H  | 2.666052000  | 3.199227000  | 1.657724000  |
| H  | 1.209609000  | 3.933016000  | 0.972819000  |
| N  | 0.621220000  | 0.993326000  | 0.600674000  |
| C  | 2.910403000  | 0.022483000  | -0.014451000 |
| C  | 2.365925000  | -1.357902000 | 0.377261000  |
| C  | 2.178044000  | -1.685728000 | 1.721366000  |
| C  | 1.971913000  | -2.280345000 | -0.601040000 |
| C  | 1.587462000  | -2.897594000 | 2.083422000  |
| H  | 2.483062000  | -0.970913000 | 2.487471000  |
| C  | 1.380568000  | -3.489625000 | -0.243377000 |
| H  | 2.113220000  | -2.046347000 | -1.659285000 |
| C  | 1.178559000  | -3.800411000 | 1.103440000  |
| H  | 1.435212000  | -3.128751000 | 3.141066000  |
| H  | 1.067899000  | -4.188567000 | -1.023349000 |
| H  | 0.708829000  | -4.746161000 | 1.386245000  |
| C  | 3.879781000  | -0.135743000 | -1.201468000 |
| C  | 4.880075000  | -1.114408000 | -1.108687000 |
| C  | 3.839999000  | 0.649976000  | -2.358021000 |
| C  | 5.832174000  | -1.278874000 | -2.109687000 |
| H  | 4.904661000  | -1.772078000 | -0.236954000 |
| C  | 4.788827000  | 0.484350000  | -3.370975000 |
| H  | 3.066644000  | 1.405870000  | -2.497588000 |
| C  | 5.794066000  | -0.471259000 | -3.247961000 |
| H  | 6.602514000  | -2.047269000 | -2.003402000 |
| H  | 4.735112000  | 1.111607000  | -4.264537000 |
| H  | 6.537584000  | -0.597525000 | -4.039177000 |
| O  | 3.563465000  | 0.588399000  | 1.097288000  |
| Si | 5.114797000  | 0.860216000  | 1.697158000  |
| C  | 6.144550000  | 1.871966000  | 0.500665000  |
| H  | 7.091151000  | 2.166221000  | 0.982897000  |

|   |              |              |              |
|---|--------------|--------------|--------------|
| H | 6.387995000  | 1.303544000  | -0.410211000 |
| H | 5.614792000  | 2.790803000  | 0.203322000  |
| C | 5.998733000  | -0.735189000 | 2.149604000  |
| H | 6.474081000  | -1.219615000 | 1.284619000  |
| H | 6.788982000  | -0.512915000 | 2.885239000  |
| H | 5.301744000  | -1.454129000 | 2.608909000  |
| C | 4.790523000  | 1.824482000  | 3.270582000  |
| H | 4.132993000  | 1.252317000  | 3.944382000  |
| H | 5.735108000  | 2.020028000  | 3.802877000  |
| H | 4.309858000  | 2.792748000  | 3.064213000  |
| C | 1.713975000  | 0.984779000  | -0.360149000 |
| H | 1.317307000  | 0.678720000  | -1.340853000 |
| C | -0.391072000 | 0.001740000  | 0.568953000  |
| H | 0.035541000  | -0.917240000 | 0.142985000  |
| C | -1.041784000 | -0.390056000 | 1.873541000  |
| C | -2.144583000 | -1.181105000 | 1.783855000  |
| C | -0.787325000 | -0.231927000 | 3.280228000  |
| O | -2.598339000 | -1.514751000 | 3.007418000  |
| C | -1.771060000 | -0.931974000 | 3.910556000  |
| H | 0.011499000  | 0.319716000  | 3.768583000  |
| H | -2.012475000 | -1.094617000 | 4.958220000  |
| C | -2.719938000 | -1.787968000 | 0.544853000  |
| H | -2.239781000 | -2.775940000 | 0.453184000  |
| C | -4.217462000 | -2.020876000 | 0.653086000  |
| C | -4.726437000 | -3.319608000 | 0.737212000  |
| C | -5.109615000 | -0.941602000 | 0.698448000  |
| C | -6.099801000 | -3.541598000 | 0.858669000  |
| H | -4.039311000 | -4.171176000 | 0.709549000  |
| C | -6.479855000 | -1.160276000 | 0.821481000  |
| H | -4.725264000 | 0.079986000  | 0.621201000  |
| C | -6.980188000 | -2.462032000 | 0.901218000  |
| H | -6.481312000 | -4.564202000 | 0.920246000  |
| H | -7.162565000 | -0.306971000 | 0.853896000  |
| H | -8.055739000 | -2.632768000 | 0.996149000  |
| C | -3.754264000 | 2.920898000  | -1.037465000 |
| C | -2.772079000 | 3.846920000  | -0.637927000 |
| C | -3.006585000 | 5.222091000  | -0.648295000 |
| C | -4.253671000 | 5.671852000  | -1.075497000 |
| C | -5.241911000 | 4.760668000  | -1.479942000 |
| C | -5.004201000 | 3.390385000  | -1.463984000 |
| C | -2.163668000 | 1.461819000  | -0.504900000 |
| H | -2.233838000 | 5.927062000  | -0.332233000 |
| H | -4.462219000 | 6.744344000  | -1.094842000 |
| H | -6.213981000 | 5.133953000  | -1.812555000 |
| H | -5.769778000 | 2.675080000  | -1.773424000 |
| N | -1.535831000 | 0.263346000  | -0.374041000 |
| N | -3.382033000 | 1.594596000  | -0.947172000 |
| S | -1.328245000 | 2.984602000  | -0.167345000 |
| C | -2.301140000 | -0.936153000 | -0.713803000 |
| H | -3.231361000 | -0.560297000 | -1.158013000 |
| C | -1.593938000 | -1.737796000 | -1.806160000 |
| C | -0.718145000 | -1.089969000 | -2.685230000 |
| C | -1.858093000 | -3.096211000 | -2.017919000 |
| C | -0.091508000 | -1.783137000 | -3.719348000 |
| H | -0.519864000 | -0.024682000 | -2.548835000 |
| C | -1.237808000 | -3.791930000 | -3.056241000 |
| H | -2.559603000 | -3.632932000 | -1.375119000 |
| C | -0.343074000 | -3.142159000 | -3.905966000 |
| H | 0.599661000  | -1.254017000 | -4.380892000 |
| H | -1.456203000 | -4.853637000 | -3.198137000 |
| H | 0.149771000  | -3.689755000 | -4.713362000 |

### INT3

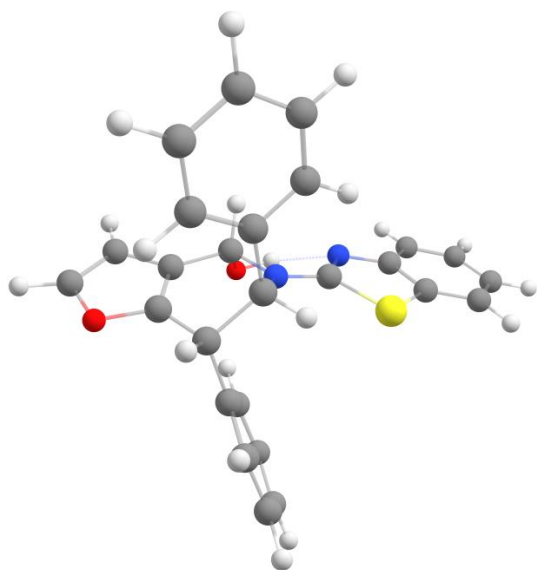

|   |              |              |              |
|---|--------------|--------------|--------------|
| C | 1.806634000  | -0.838383000 | -1.757425000 |
| C | 2.395601000  | -2.146230000 | -2.183633000 |
| C | 3.378289000  | -2.773832000 | -1.491262000 |
| C | 2.171078000  | -2.933212000 | -3.363546000 |
| O | 3.776024000  | -3.888600000 | -2.132511000 |
| C | 3.039153000  | -3.977056000 | -3.271034000 |
| H | 1.463291000  | -2.743223000 | -4.168124000 |
| H | 3.246736000  | -4.832697000 | -3.909028000 |
| C | 3.915793000  | -2.365473000 | -0.164866000 |
| H | 4.118606000  | -3.257138000 | 0.445201000  |
| C | 5.192694000  | -1.538663000 | -0.219979000 |
| C | 6.176828000  | -1.729963000 | 0.756075000  |
| C | 5.380498000  | -0.541796000 | -1.185221000 |
| C | 7.326987000  | -0.941065000 | 0.772102000  |
| H | 6.038827000  | -2.506780000 | 1.514697000  |
| C | 6.529144000  | 0.249329000  | -1.168224000 |
| H | 4.616892000  | -0.372707000 | -1.949581000 |
| C | 7.505528000  | 0.052448000  | -0.191012000 |
| H | 8.087492000  | -1.105647000 | 1.539995000  |
| H | 6.662403000  | 1.025702000  | -1.926268000 |
| H | 8.407085000  | 0.670602000  | -0.182085000 |
| C | 1.522012000  | 2.903299000  | -0.012132000 |
| C | 2.168363000  | 2.912488000  | 1.239725000  |
| C | 2.237557000  | 4.061534000  | 2.026424000  |
| C | 1.647976000  | 5.225279000  | 1.538387000  |
| C | 1.005069000  | 5.233070000  | 0.291501000  |
| C | 0.936628000  | 4.082978000  | -0.488020000 |
| C | 2.150454000  | 0.770909000  | 0.024963000  |
| H | 2.741446000  | 4.050557000  | 2.995578000  |
| H | 1.688530000  | 6.140087000  | 2.134454000  |
| H | 0.551448000  | 6.157525000  | -0.074888000 |
| H | 0.436101000  | 4.081845000  | -1.458860000 |
| N | 2.331810000  | -0.499689000 | -0.406349000 |
| N | 1.523858000  | 1.682740000  | -0.664187000 |
| S | 2.808862000  | 1.320543000  | 1.574849000  |
| C | 2.769586000  | -1.568656000 | 0.498808000  |
| H | 3.197027000  | -1.084259000 | 1.389348000  |
| C | 1.580605000  | -2.413111000 | 0.970597000  |
| C | 1.511139000  | -3.800844000 | 0.814662000  |
| C | 0.513710000  | -1.760271000 | 1.604414000  |
| C | 0.404961000  | -4.516823000 | 1.276566000  |
| H | 2.315479000  | -4.348779000 | 0.320487000  |
| C | -0.590045000 | -2.471883000 | 2.067180000  |
| H | 0.545250000  | -0.676473000 | 1.748135000  |
| C | -0.648763000 | -3.856940000 | 1.903997000  |

|   |              |              |              |
|---|--------------|--------------|--------------|
| H | 0.371023000  | -5.600565000 | 1.139002000  |
| H | -1.408248000 | -1.941420000 | 2.560974000  |
| H | -1.514460000 | -4.418039000 | 2.265137000  |
| H | 0.702086000  | -0.899833000 | -1.681959000 |
| O | 2.177568000  | 0.116399000  | -2.697597000 |
| H | 1.803726000  | 0.958860000  | -2.370081000 |

### INT4

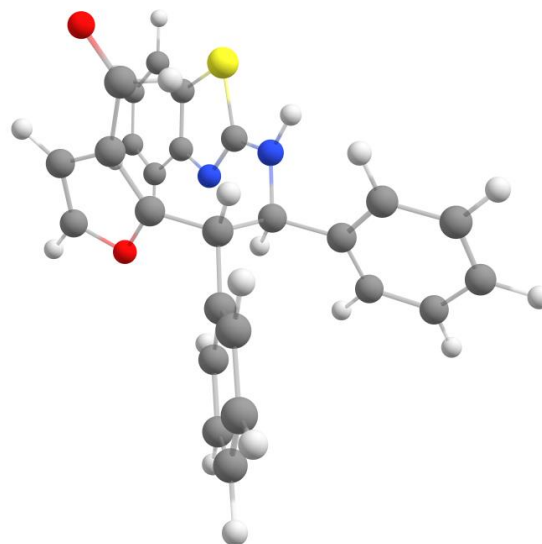

|   |              |              |              |
|---|--------------|--------------|--------------|
| C | 0.175000000  | 0.700763000  | 1.296207000  |
| H | 0.260413000  | -0.283717000 | 0.778502000  |
| C | -1.182950000 | 1.118529000  | 1.641590000  |
| C | -2.351808000 | 0.444689000  | 1.369643000  |
| C | -1.565329000 | 2.343072000  | 2.296276000  |
| O | -3.391367000 | 1.162240000  | 1.816901000  |
| C | -2.916936000 | 2.310334000  | 2.370997000  |
| H | -0.900565000 | 3.126597000  | 2.653178000  |
| H | -3.664787000 | 2.989926000  | 2.771820000  |
| C | -2.632146000 | -0.816972000 | 0.613129000  |
| H | -1.677488000 | -1.361402000 | 0.559545000  |
| C | -3.638283000 | -1.724421000 | 1.300163000  |
| C | -3.231619000 | -2.980412000 | 1.761529000  |
| C | -4.980717000 | -1.353060000 | 1.451163000  |
| C | -4.141931000 | -3.850844000 | 2.361627000  |
| H | -2.187174000 | -3.283777000 | 1.642223000  |
| C | -5.891902000 | -2.221573000 | 2.049723000  |
| H | -5.321635000 | -0.376495000 | 1.099498000  |
| C | -5.476142000 | -3.473342000 | 2.506081000  |
| H | -3.805126000 | -4.828958000 | 2.714711000  |
| H | -6.936443000 | -1.918143000 | 2.158374000  |
| H | -6.193279000 | -4.154288000 | 2.971678000  |
| C | -2.729736000 | 3.717512000  | -1.123928000 |
| C | -1.436744000 | 4.030040000  | -1.595380000 |
| C | -0.983613000 | 5.344396000  | -1.696375000 |
| C | -1.846552000 | 6.367186000  | -1.308511000 |
| C | -3.134201000 | 6.074298000  | -0.835544000 |
| C | -3.582864000 | 4.760696000  | -0.741980000 |
| C | -2.035389000 | 1.652261000  | -1.480283000 |
| H | 0.020860000  | 5.566821000  | -2.063998000 |
| H | -1.513338000 | 7.405807000  | -1.373139000 |
| H | -3.795804000 | 6.891144000  | -0.535898000 |
| H | -4.584227000 | 4.524869000  | -0.374598000 |
| N | -2.023466000 | 0.300307000  | -1.524309000 |
| N | -3.036380000 | 2.369562000  | -1.076416000 |
| S | -0.593880000 | 2.546724000  | -1.983581000 |
| C | -3.042167000 | -0.495898000 | -0.863676000 |
| H | -3.950648000 | 0.121111000  | -0.844504000 |
| C | -3.330160000 | -1.765691000 | -1.639843000 |

|   |              |              |              |
|---|--------------|--------------|--------------|
| C | -2.313256000 | -2.688148000 | -1.914356000 |
| C | -4.631037000 | -2.047149000 | -2.065395000 |
| C | -2.591378000 | -3.862937000 | -2.610845000 |
| H | -1.288271000 | -2.497771000 | -1.579326000 |
| C | -4.913752000 | -3.225565000 | -2.756364000 |
| H | -5.432754000 | -1.335950000 | -1.847192000 |
| C | -3.893808000 | -4.135134000 | -3.032689000 |
| H | -1.787618000 | -4.573529000 | -2.820007000 |
| H | -5.937452000 | -3.433336000 | -3.078233000 |
| H | -4.112922000 | -5.057978000 | -3.575967000 |
| O | 1.166166000  | 1.356211000  | 1.537917000  |
| H | -1.168891000 | -0.161143000 | -1.813562000 |

## INT5

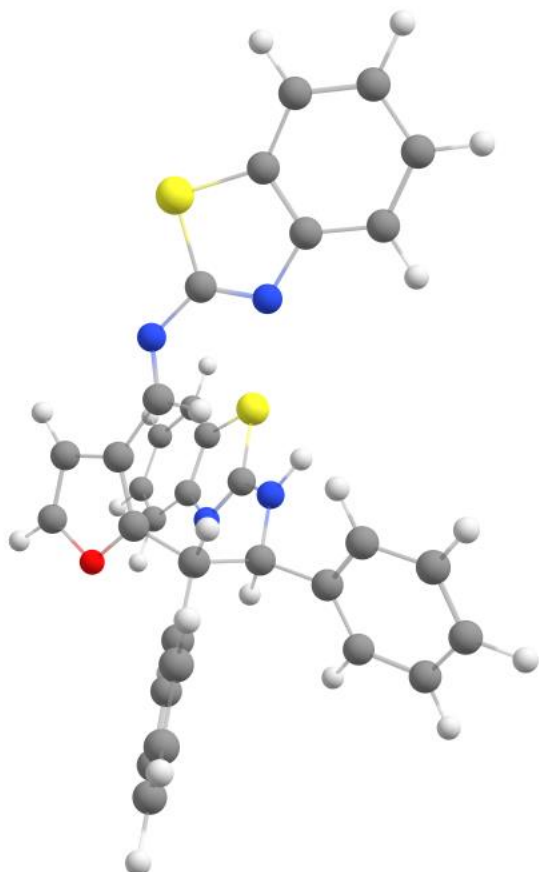

|   |              |              |              |
|---|--------------|--------------|--------------|
| H | -7.177322000 | -1.149547000 | 2.277917000  |
| H | -6.874492000 | -3.439089000 | 3.216609000  |
| C | -2.818771000 | 3.514402000  | -1.050499000 |
| C | -1.665039000 | 3.827304000  | -1.801344000 |
| C | -1.269189000 | 5.143858000  | -2.032426000 |
| C | -2.045953000 | 6.167149000  | -1.492948000 |
| C | -3.192232000 | 5.873129000  | -0.739614000 |
| C | -3.584107000 | 4.557572000  | -0.513873000 |
| C | -2.187190000 | 1.449907000  | -1.507045000 |
| H | -0.374941000 | 5.368007000  | -2.618669000 |
| H | -1.757352000 | 7.207623000  | -1.660446000 |
| H | -3.786464000 | 6.690673000  | -0.323391000 |
| H | -4.474188000 | 4.319694000  | 0.073237000  |
| N | -2.170775000 | 0.098988000  | -1.517949000 |
| N | -3.087288000 | 2.165312000  | -0.907115000 |
| S | -0.902863000 | 2.342836000  | -2.329870000 |
| C | -3.170842000 | -0.675059000 | -0.809355000 |
| H | -4.079346000 | -0.058314000 | -0.783501000 |
| C | -3.467871000 | -1.962805000 | -1.551313000 |
| C | -2.443790000 | -2.874740000 | -1.837394000 |
| C | -4.774192000 | -2.266142000 | -1.943446000 |
| C | -2.720790000 | -4.060018000 | -2.516135000 |
| H | -1.413264000 | -2.664332000 | -1.530909000 |
| C | -5.054916000 | -3.456279000 | -2.615274000 |
| H | -5.580298000 | -1.562553000 | -1.716894000 |
| C | -4.028420000 | -4.353941000 | -2.906096000 |
| H | -1.911414000 | -4.760395000 | -2.737677000 |
| H | -6.082270000 | -3.681603000 | -2.912767000 |
| H | -4.246244000 | -5.284496000 | -3.436600000 |
| H | -1.432001000 | -0.378054000 | -2.021434000 |
| N | 1.236132000  | 0.841447000  | 0.340158000  |
| C | 2.116664000  | 0.241986000  | -0.537048000 |
| C | 4.148051000  | -0.428923000 | -1.726227000 |
| C | 2.926416000  | -0.939626000 | -2.216704000 |
| C | 5.370693000  | -0.757826000 | -2.319042000 |
| C | 2.932685000  | -1.792927000 | -3.330393000 |
| C | 5.355457000  | -1.608186000 | -3.418103000 |
| H | 6.310184000  | -0.358918000 | -1.929879000 |
| C | 4.145650000  | -2.121010000 | -3.919280000 |
| H | 1.986904000  | -2.185447000 | -3.710736000 |
| H | 6.298100000  | -1.880639000 | -3.899001000 |
| H | 4.162547000  | -2.786258000 | -4.786193000 |
| S | 3.826027000  | 0.597246000  | -0.356558000 |
| N | 1.800620000  | -0.536535000 | -1.523013000 |

|   |              |              |             |
|---|--------------|--------------|-------------|
| C | 0.150237000  | 0.199638000  | 0.580458000 |
| H | 0.010669000  | -0.815293000 | 0.172964000 |
| C | -0.945574000 | 0.759242000  | 1.334325000 |
| C | -2.211295000 | 0.217006000  | 1.374041000 |
| C | -1.017695000 | 2.004577000  | 2.053410000 |
| O | -3.020148000 | 1.022036000  | 2.073514000 |
| C | -2.299189000 | 2.101504000  | 2.482249000 |
| H | -0.210323000 | 2.713651000  | 2.222430000 |
| H | -2.840056000 | 2.838014000  | 3.071280000 |
| C | -2.765280000 | -0.985905000 | 0.677814000 |
| H | -1.938727000 | -1.710476000 | 0.626779000 |
| C | -3.913244000 | -1.650805000 | 1.413335000 |
| C | -3.753546000 | -2.935368000 | 1.941743000 |
| C | -5.155966000 | -1.017078000 | 1.542236000 |
| C | -4.810360000 | -3.576549000 | 2.588883000 |
| H | -2.789672000 | -3.442702000 | 1.839117000 |
| C | -6.213012000 | -1.656298000 | 2.187192000 |
| H | -5.300840000 | -0.011800000 | 1.137762000 |
| C | -6.043586000 | -2.938204000 | 2.712981000 |
| H | -4.668887000 | -4.581481000 | 2.995138000 |

PR

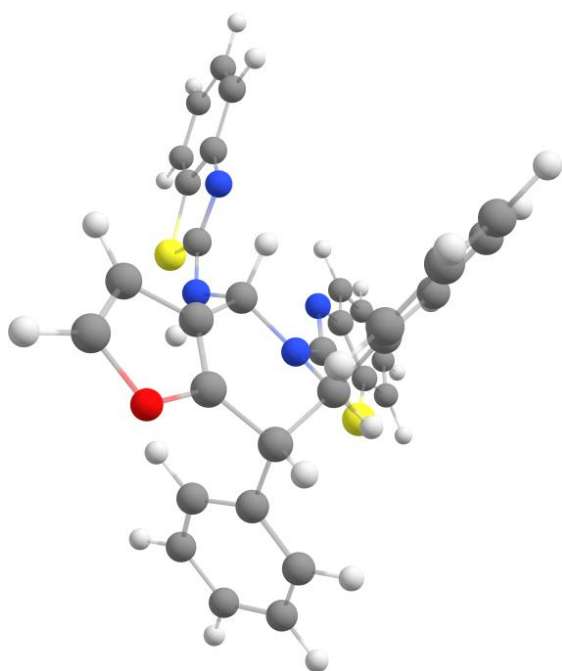

|   |              |              |              |
|---|--------------|--------------|--------------|
| C | -1.159895000 | -0.542544000 | 1.895263000  |
| C | -2.625471000 | -0.641643000 | 1.574771000  |
| C | -3.150550000 | -0.334487000 | 0.361609000  |
| C | -3.737885000 | -0.972062000 | 2.420974000  |
| O | -4.492813000 | -0.449143000 | 0.381767000  |
| C | -4.841021000 | -0.836090000 | 1.636517000  |
| H | -3.714357000 | -1.264339000 | 3.469231000  |
| H | -5.904456000 | -0.973198000 | 1.817317000  |
| C | -2.382577000 | 0.017520000  | -0.862923000 |
| H | -2.831325000 | -0.470580000 | -1.740832000 |
| C | -2.278714000 | 1.507312000  | -1.157743000 |
| C | -1.949830000 | 1.917883000  | -2.455713000 |
| C | -2.427480000 | 2.477038000  | -0.162686000 |
| C | -1.761343000 | 3.266487000  | -2.750428000 |
| H | -1.832000000 | 1.167354000  | -3.244083000 |
| C | -2.241482000 | 3.829128000  | -0.455532000 |
| H | -2.697022000 | 2.175838000  | 0.853158000  |
| C | -1.904401000 | 4.227662000  | -1.748068000 |
| H | -1.502862000 | 3.568783000  | -3.768639000 |

|   |              |              |              |
|---|--------------|--------------|--------------|
| H | -2.362935000 | 4.575137000  | 0.334261000  |
| H | -1.757099000 | 5.286407000  | -1.976394000 |
| C | 2.796229000  | 0.867495000  | 1.622447000  |
| C | 2.952450000  | 1.530953000  | 0.387666000  |
| C | 4.120899000  | 2.223514000  | 0.067673000  |
| C | 5.138508000  | 2.263056000  | 1.017121000  |
| C | 4.992068000  | 1.617770000  | 2.255258000  |
| C | 3.831366000  | 0.917790000  | 2.565189000  |
| C | 0.826665000  | 0.347805000  | 0.759206000  |
| H | 4.230807000  | 2.727494000  | -0.895299000 |
| H | 6.059486000  | 2.807443000  | 0.794445000  |
| H | 5.803361000  | 1.666968000  | 2.985984000  |
| H | 3.707288000  | 0.411229000  | 3.525415000  |
| N | -0.456573000 | -0.114058000 | 0.667387000  |
| N | 1.599362000  | 0.194806000  | 1.783438000  |
| S | 1.501654000  | 1.331143000  | -0.561558000 |
| C | -0.978545000 | -0.580558000 | -0.626668000 |
| H | -0.314099000 | -0.171496000 | -1.400748000 |
| C | -0.885202000 | -2.104875000 | -0.735163000 |
| C | -1.975461000 | -2.927047000 | -1.034473000 |
| C | 0.368681000  | -2.701950000 | -0.541093000 |
| C | -1.816984000 | -4.310378000 | -1.139194000 |
| H | -2.970417000 | -2.502796000 | -1.183216000 |
| C | 0.528888000  | -4.081415000 | -0.642246000 |
| H | 1.237780000  | -2.079553000 | -0.308773000 |
| C | -0.566715000 | -4.892460000 | -0.943506000 |
| H | -2.683101000 | -4.934336000 | -1.374022000 |
| H | 1.515952000  | -4.524912000 | -0.488419000 |
| H | -0.444195000 | -5.975506000 | -1.025131000 |
| H | -0.766845000 | -1.506630000 | 2.261063000  |
| N | -0.959277000 | 0.405026000  | 2.963816000  |
| C | -0.211883000 | 0.120280000  | 4.057482000  |
| N | 0.075725000  | -1.071778000 | 4.469966000  |
| S | 0.438230000  | 1.453651000  | 5.017433000  |
| C | 0.876467000  | -1.023514000 | 5.596891000  |
| C | 1.179873000  | 0.271371000  | 6.071044000  |
| C | 1.382980000  | -2.133467000 | 6.285846000  |
| C | 1.963107000  | 0.479029000  | 7.205702000  |
| C | 2.169258000  | -1.931704000 | 7.415515000  |
| H | 1.152854000  | -3.138343000 | 5.924531000  |
| C | 2.459382000  | -0.638035000 | 7.874028000  |
| H | 2.186581000  | 1.489032000  | 7.557104000  |
| H | 2.568330000  | -2.795550000 | 7.953323000  |
| H | 3.080711000  | -0.502236000 | 8.762551000  |
| H | -1.161492000 | 1.376683000  | 2.757321000  |

# 7. NMR spectra

## (6*R*,7*S*)-5-(Benzo[*d*]thiazol-2-yl)-6,7-diphenyl-4,5,6,7-tetrahydrofuro[3,2-*c*]pyridine 4a

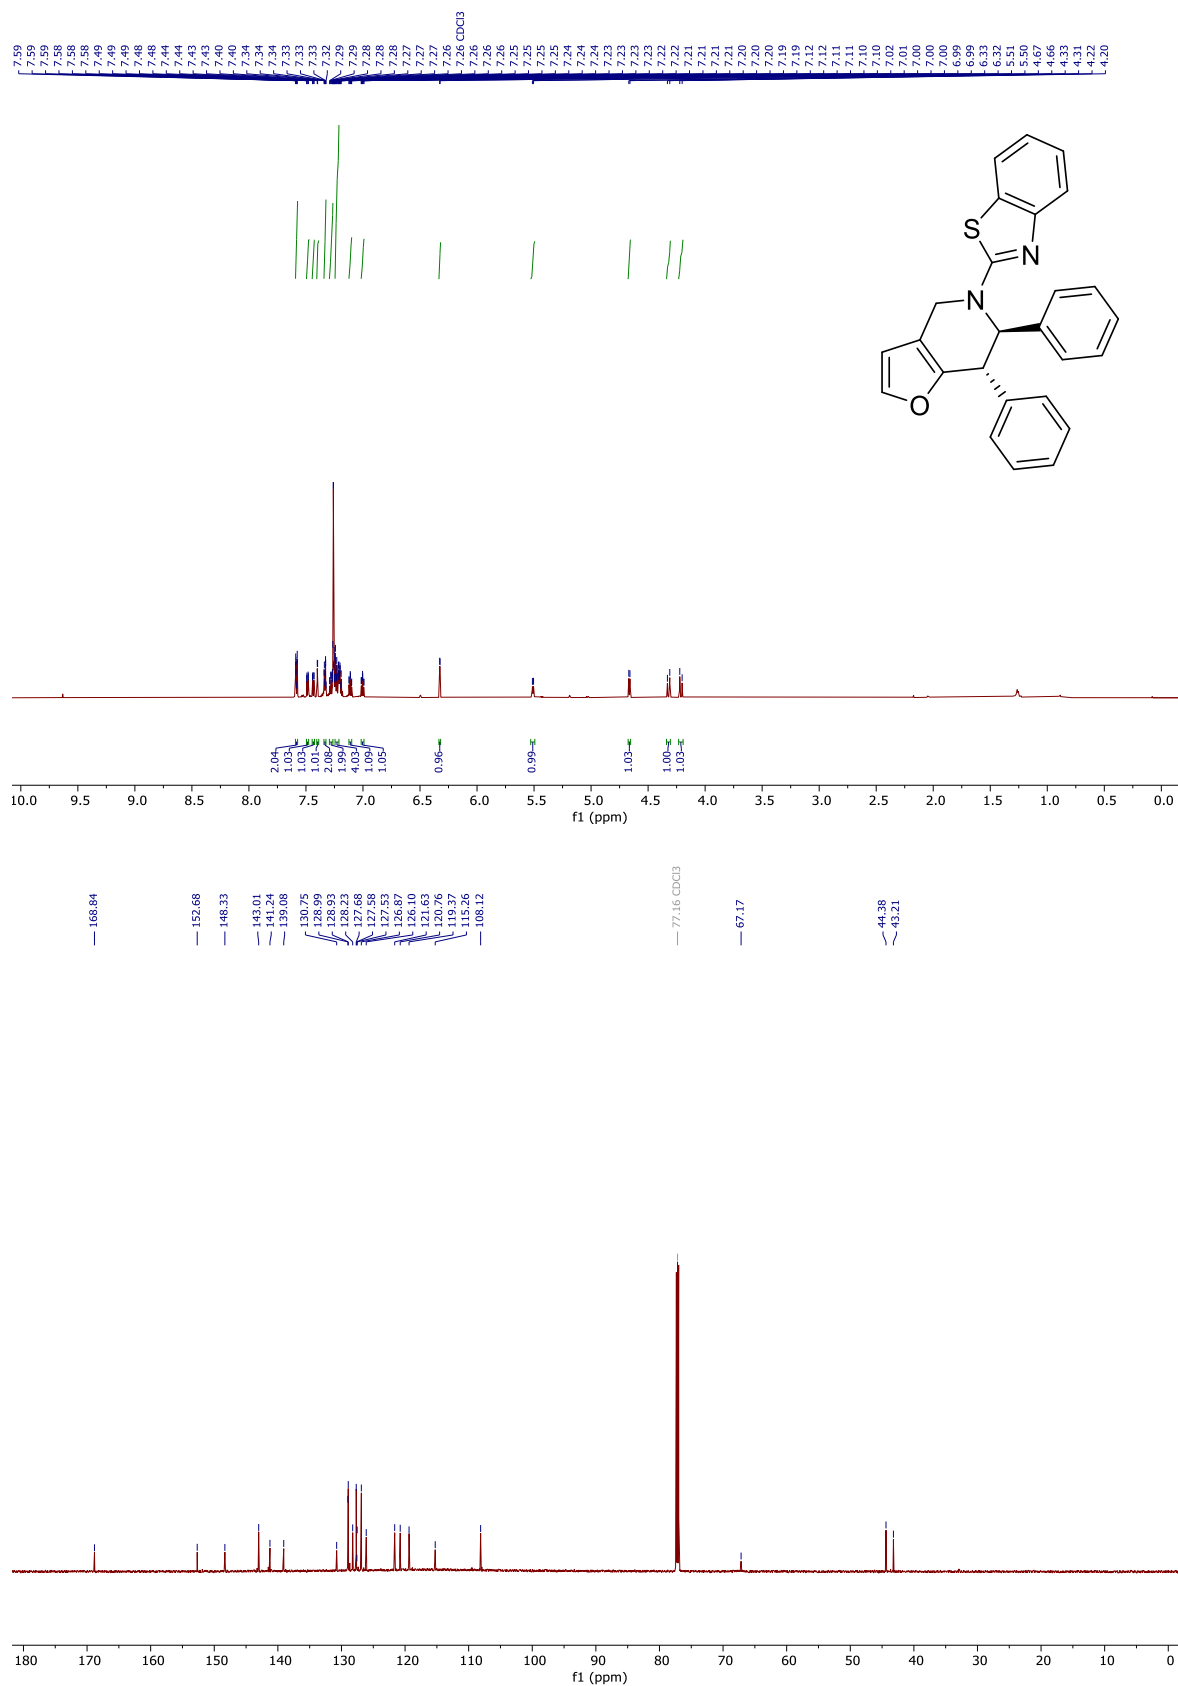

**(6*R*,7*S*)-5-(Benzo[*d*]thiazol-2-yl)-6-(3-fluorophenyl)-7-phenyl-4,5,6,7-tetrahydrofuro[3,2-*c*]pyridine 4b**

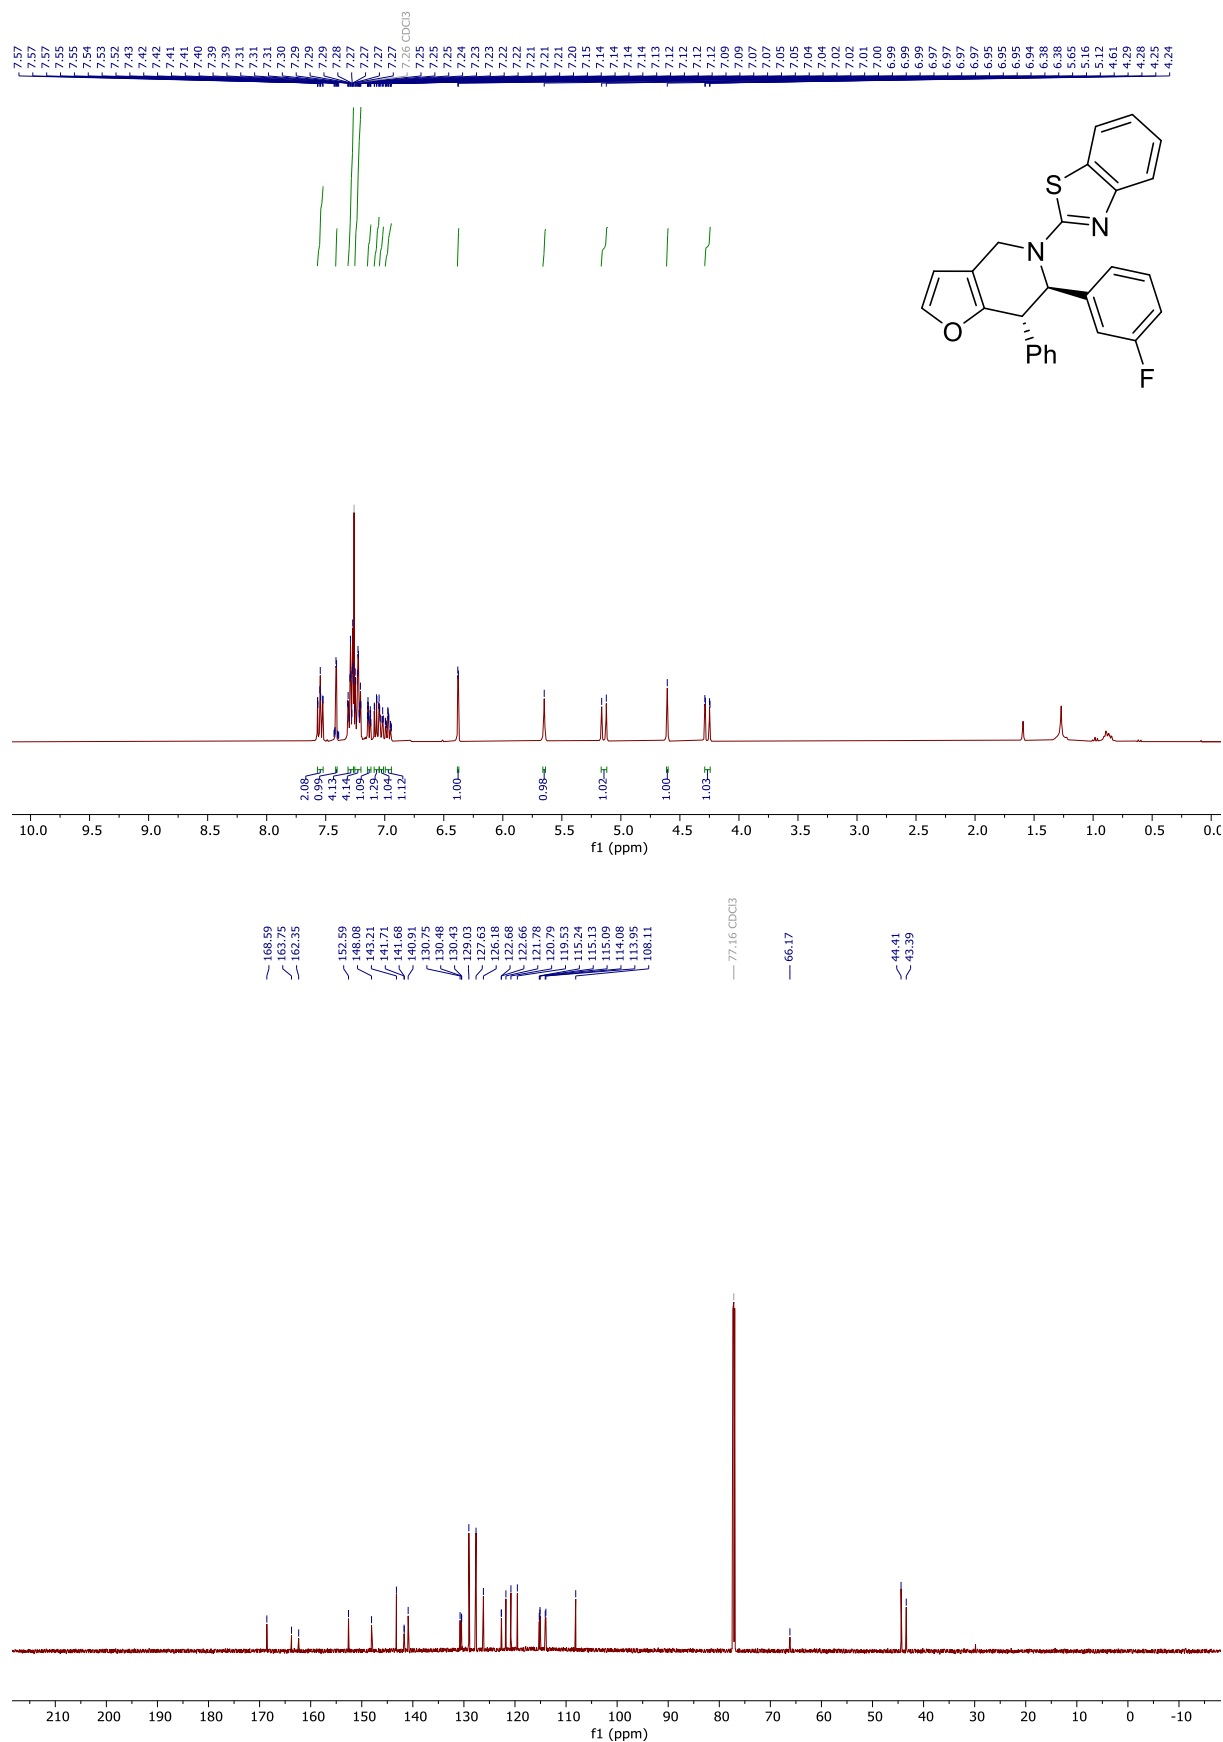

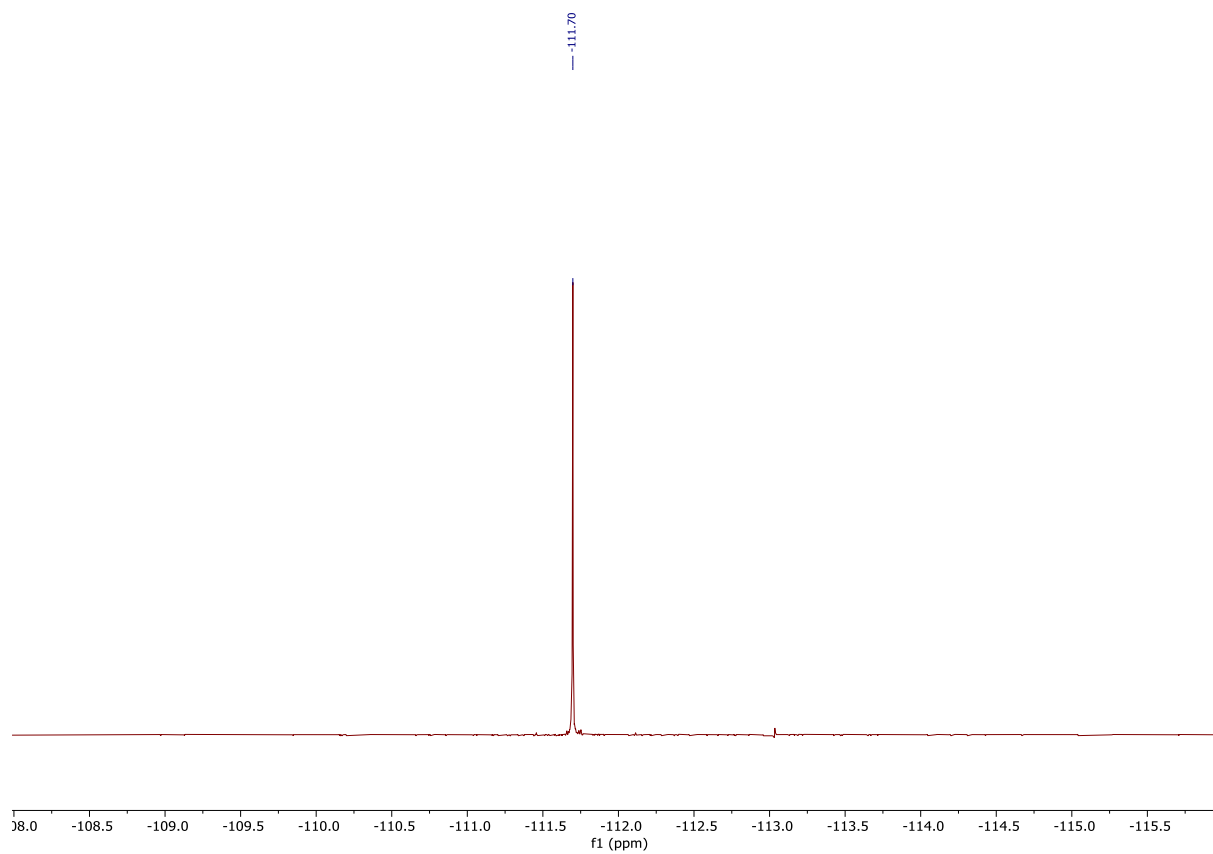

**(6*R*,7*S*)-5-(Benzo[*d*]thiazol-2-yl)-6-(4-bromophenyl)-7-phenyl-4,5,6,7-tetrahydrofuro[3,2-*c*]pyridine 4c**

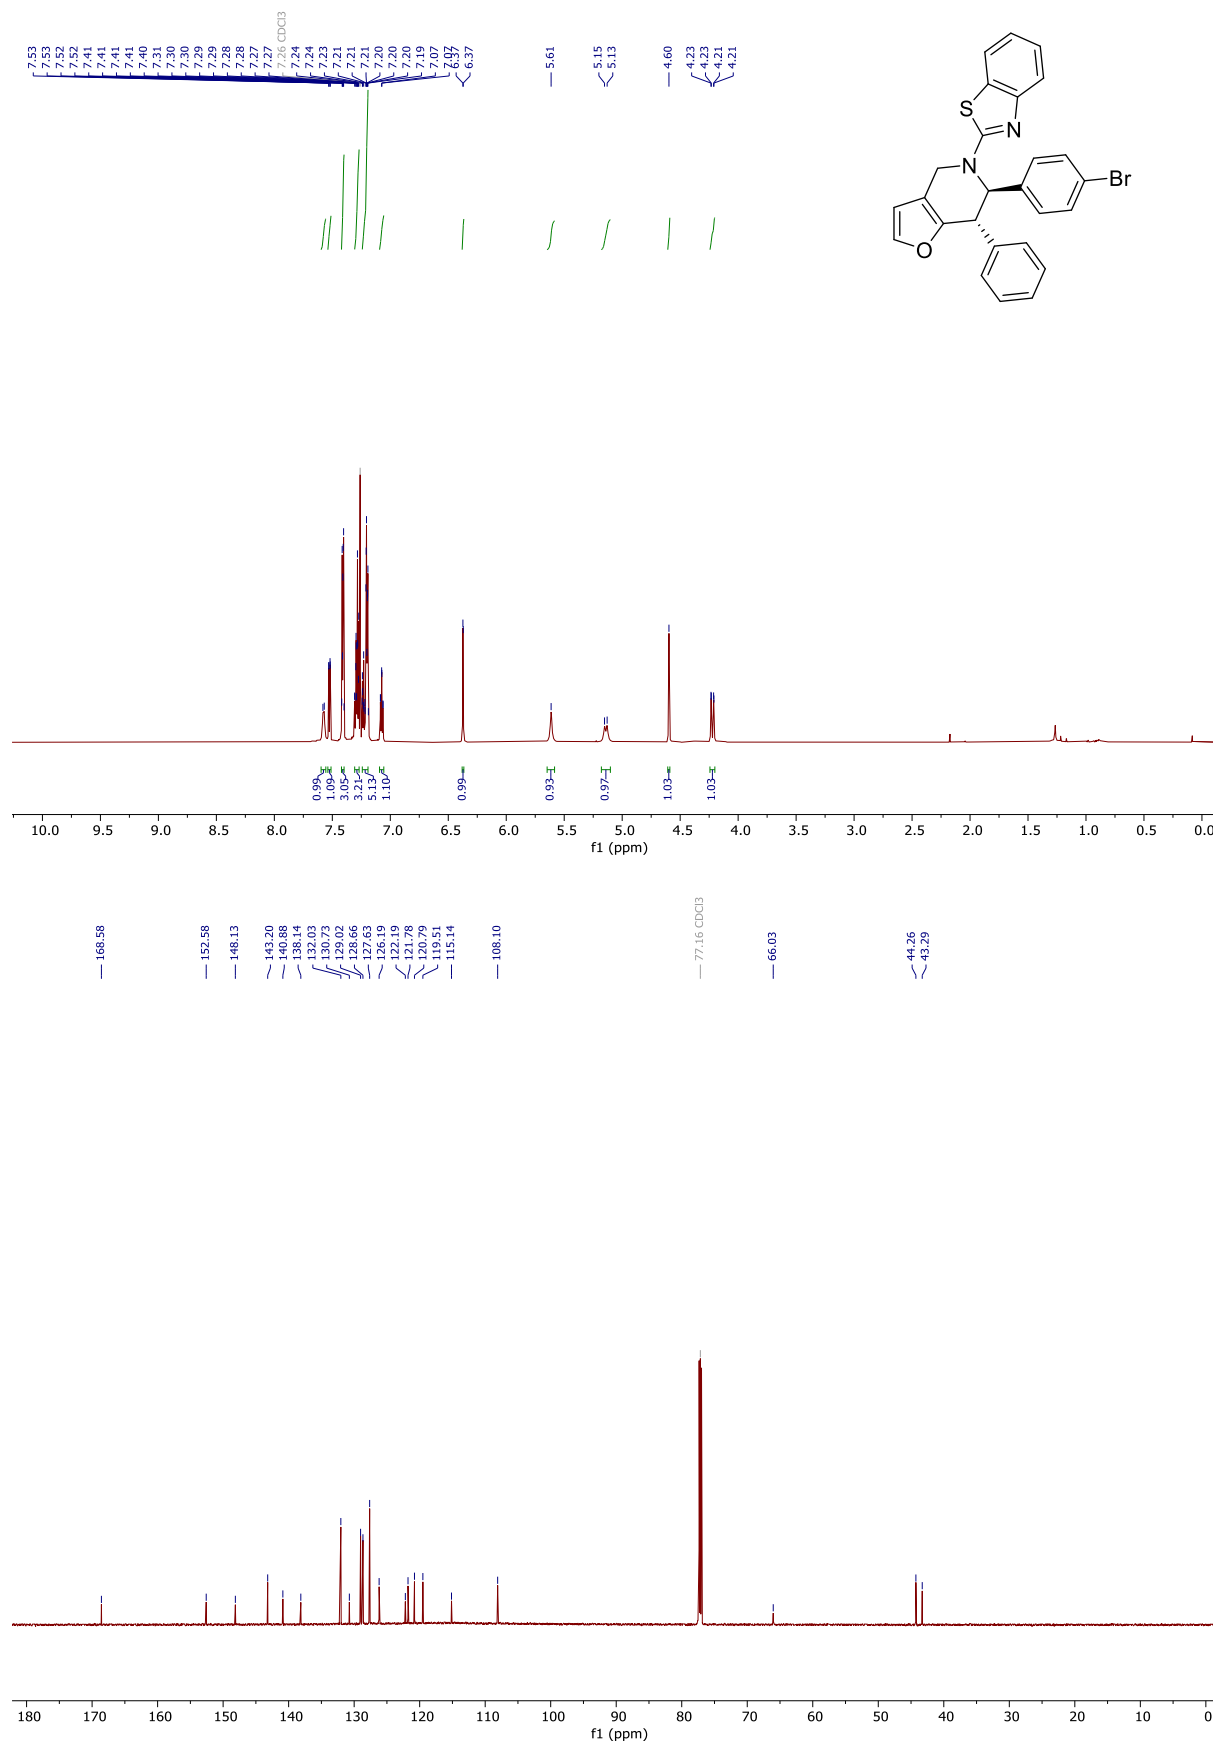



**(6*R*,7*S*)-5-(Benzo[d]thiazol-2-yl)-6-(2,4-dichlorophenyl)-7-phenyl-4,5,6,7-tetrahydrofuro[3,2-*c*]pyridine 4d**

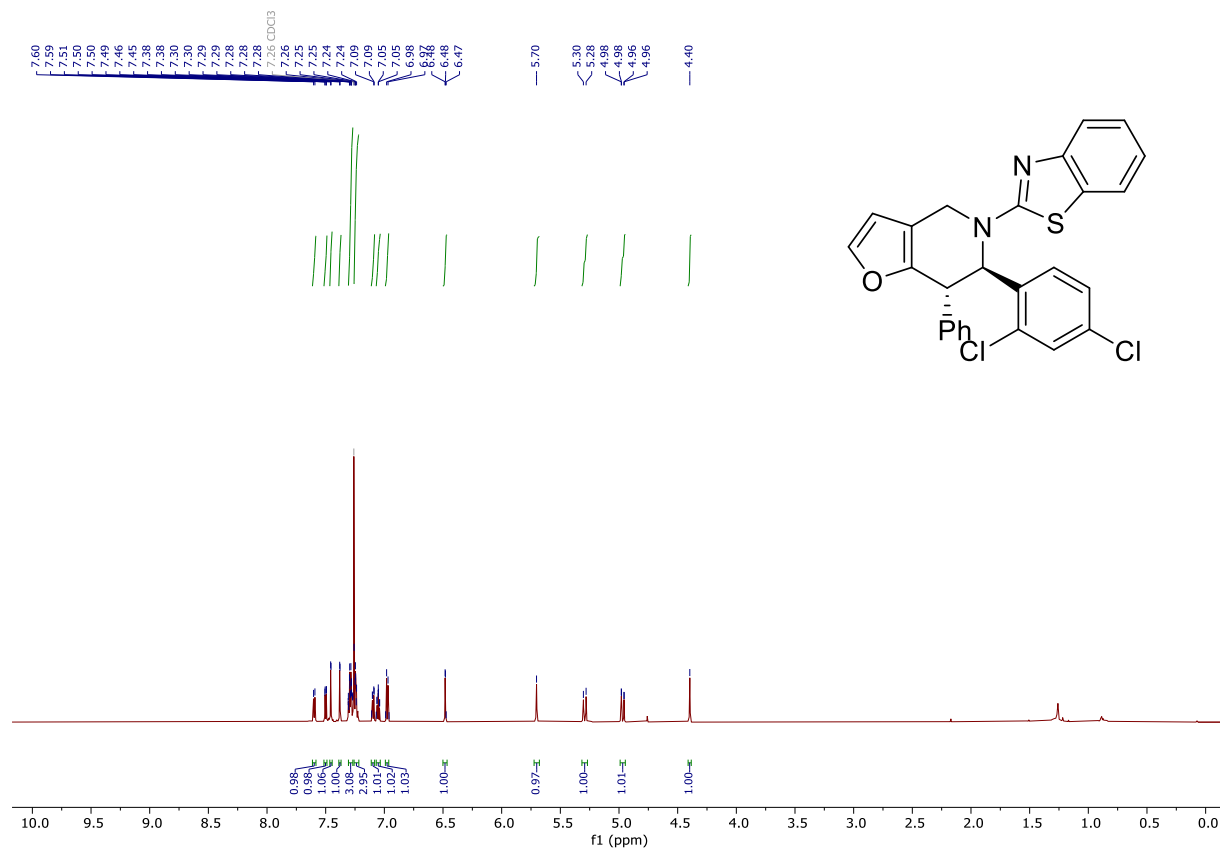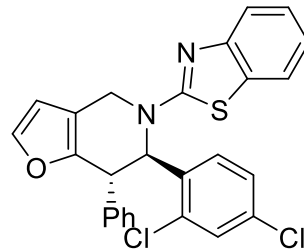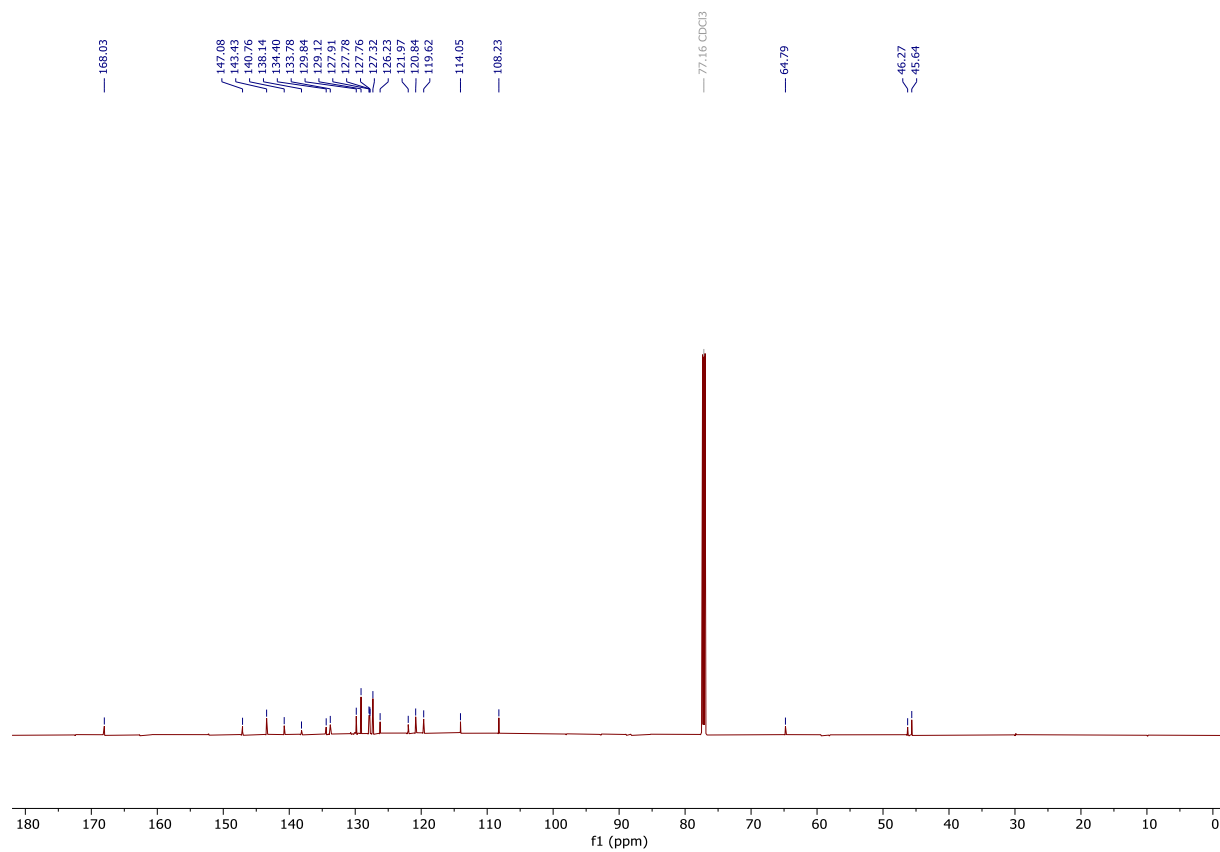

**(6*R*,7*S*)-5-(Benzo[*d*]thiazol-2-yl)-6-(4-nitrophenyl)-7-phenyl-4,5,6,7-tetrahydrofuro[3,2-*c*]pyridine 4e**

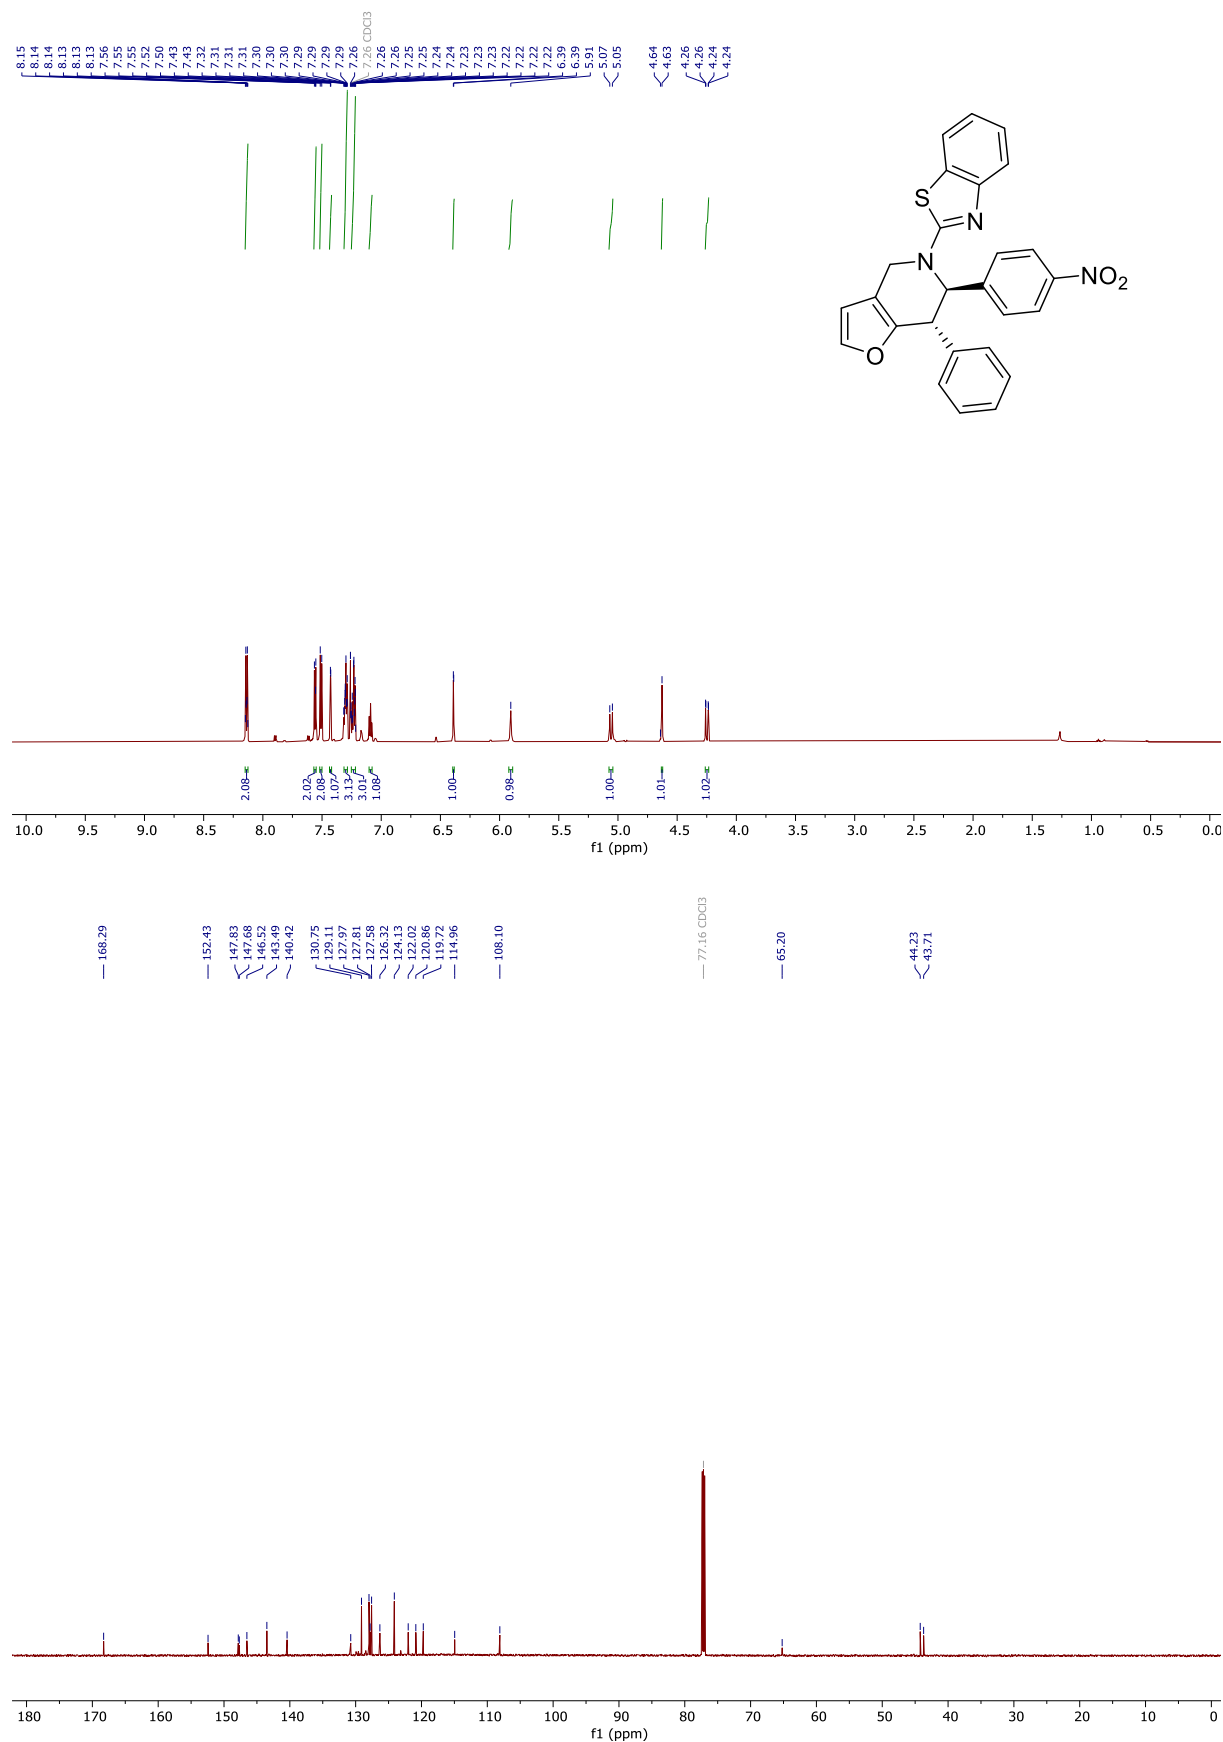

**(6*R*,7*S*)-5-(Benzo[*d*]thiazol-2-yl)-6-(3-methoxyphenyl)-7-phenyl-4,5,6,7-tetrahydrofuro[3,2-*c*]pyridine 4f**

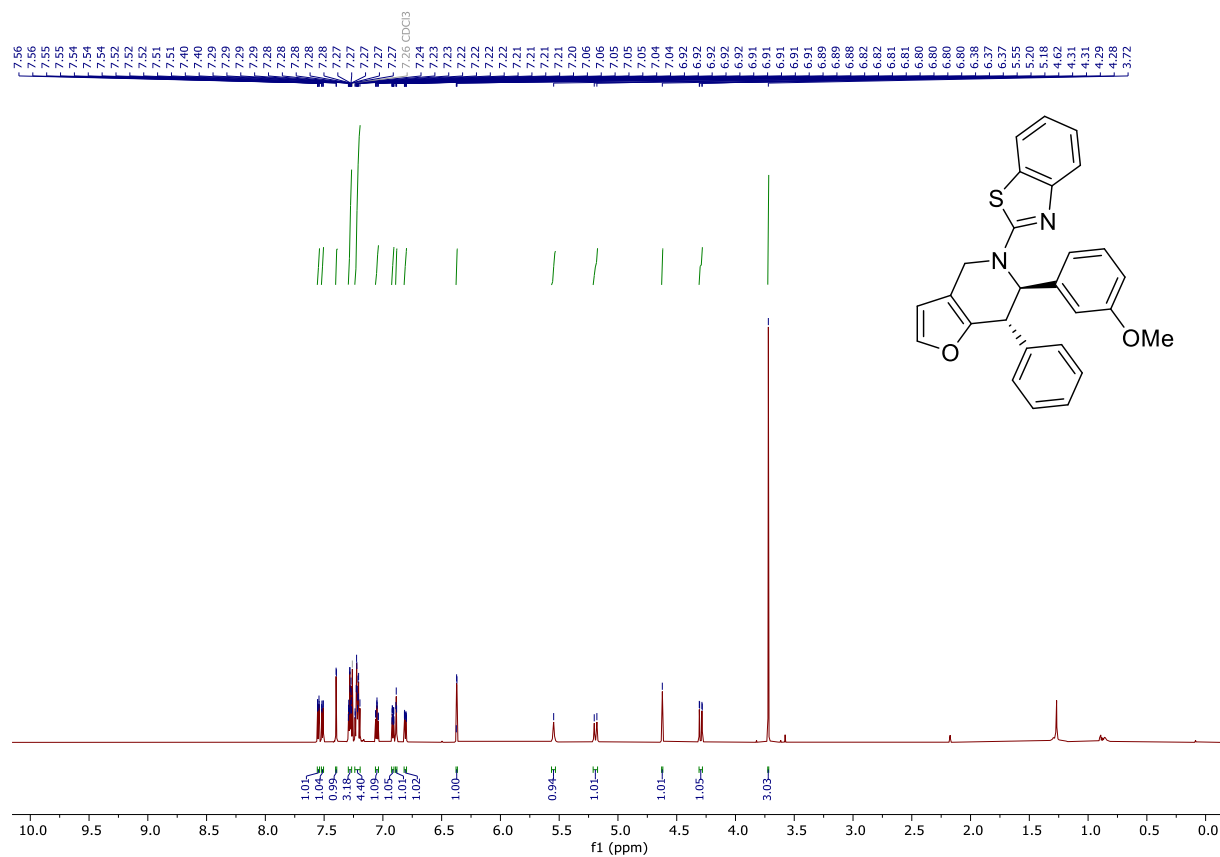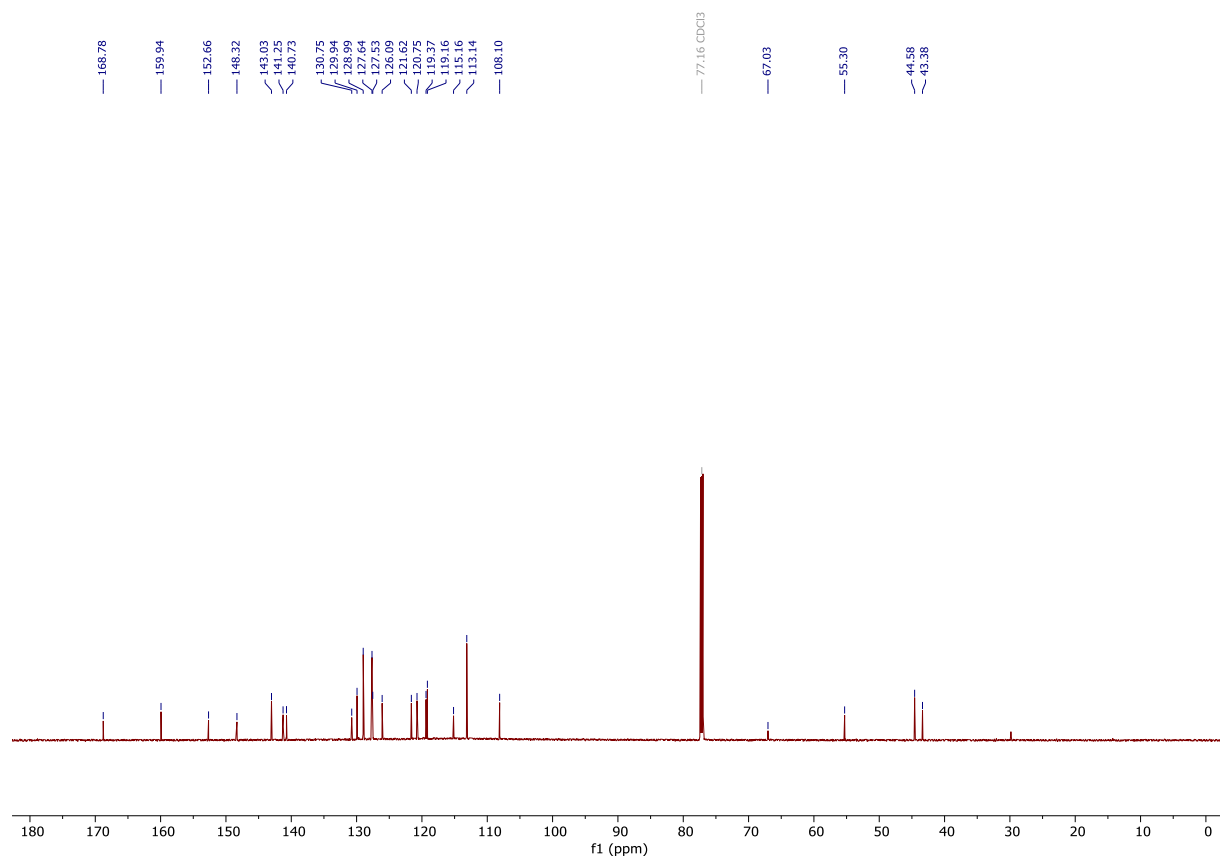

**(6*R*,7*S*)-5-(Benzo[*d*]thiazol-2-yl)-6-(2-methoxyphenyl)-7-phenyl-4,5,6,7-tetrahydrofuro[3,2-*c*]pyridine 4g**

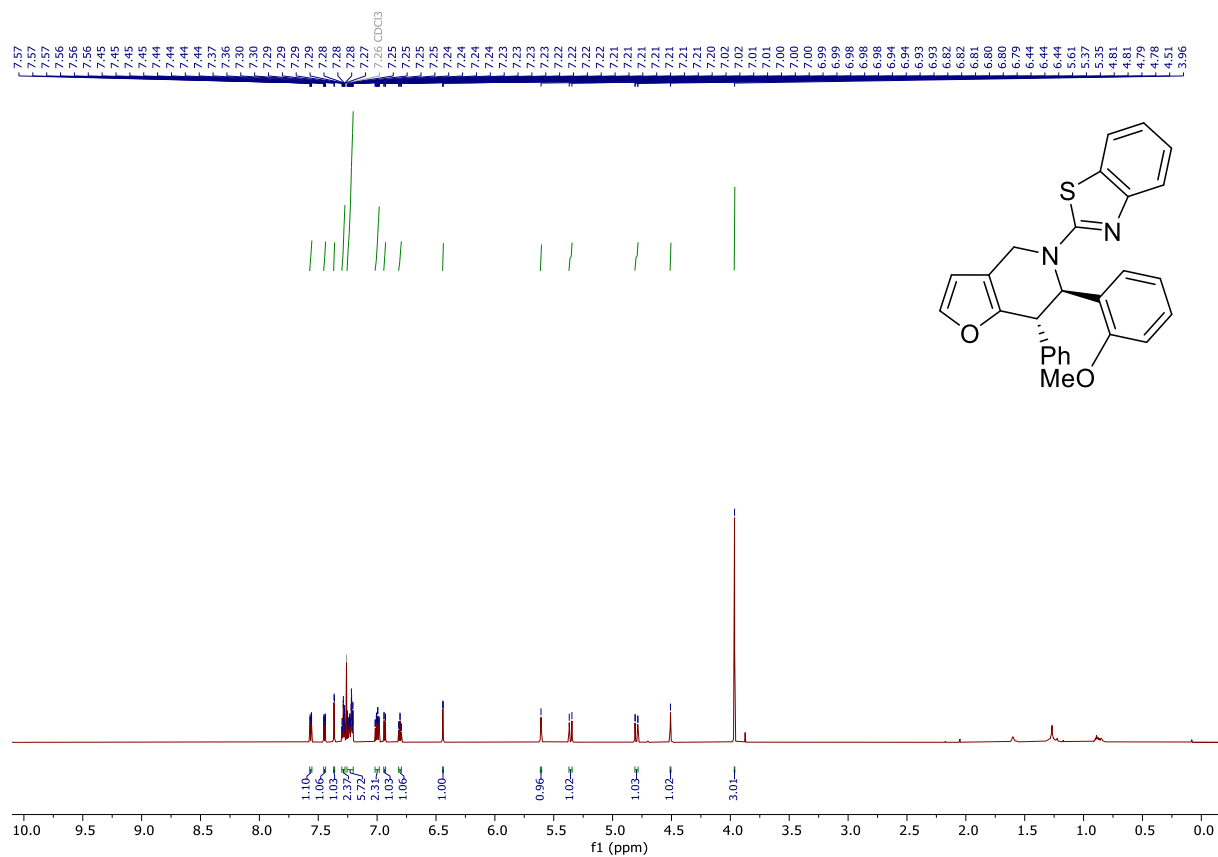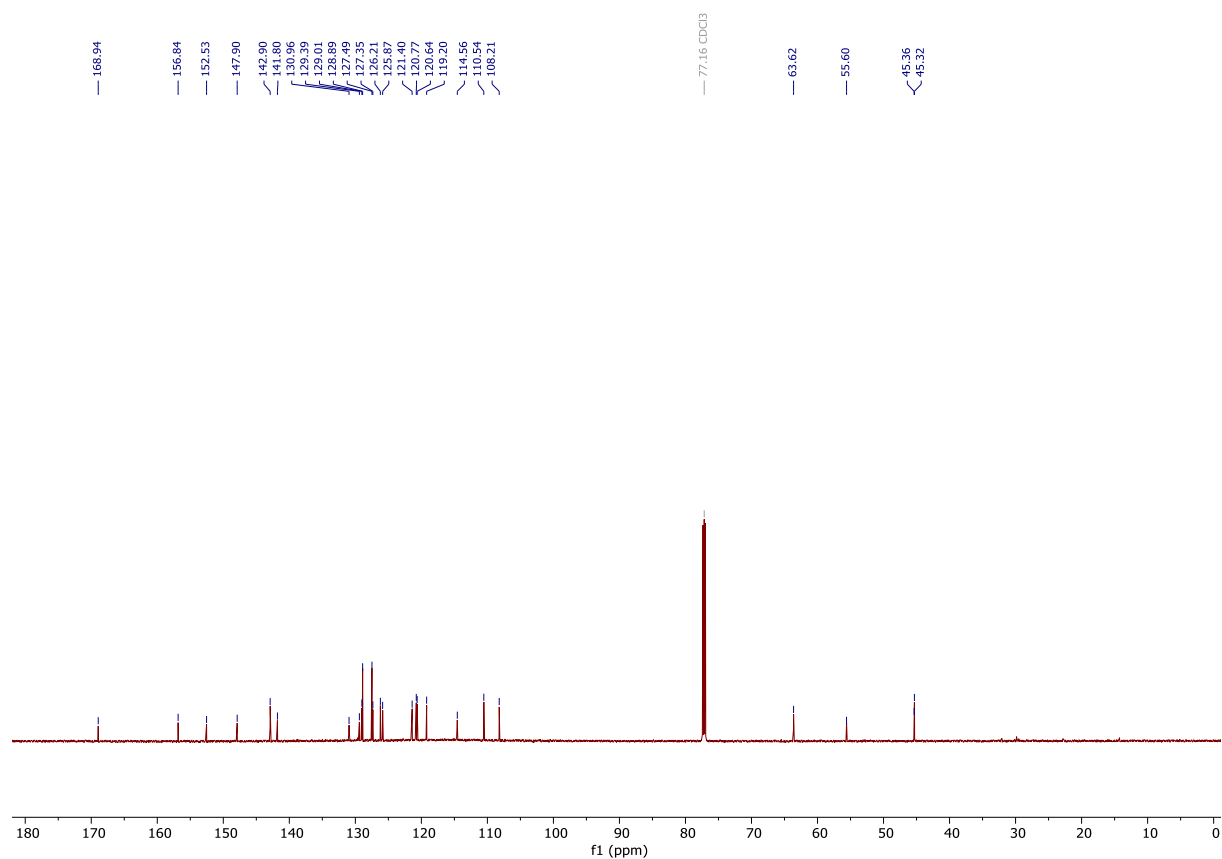

**(6*R*,7*S*)-5-(Benzo[*d*]thiazol-2-yl)-6-(naphthalen-2-yl)-7-phenyl-4,5,6,7-tetrahydrofuro[3,2-*c*]pyridine 4h**

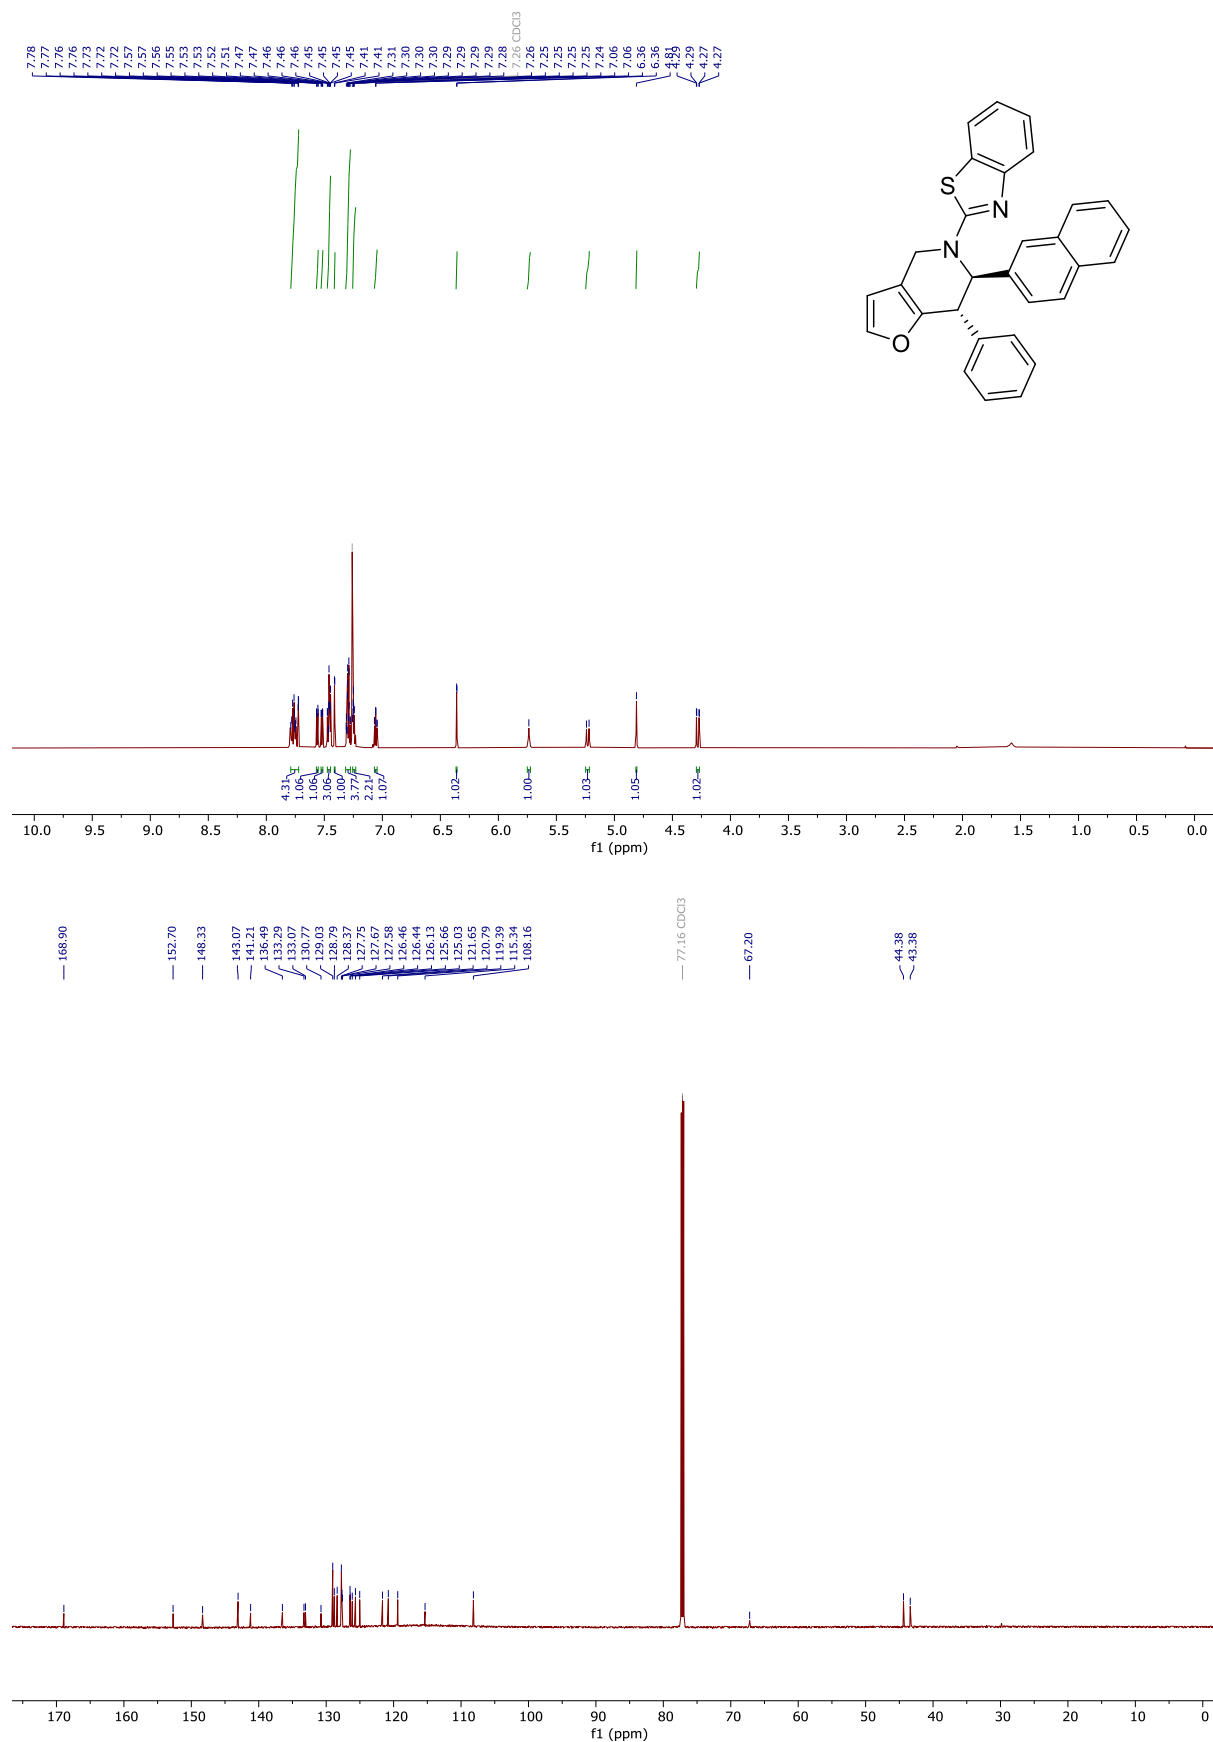

**(6*R*,7*S*)-5-(Benzo[*d*]thiazol-2-yl)-6-(furan-2-yl)-7-phenyl-4,5,6,7-tetrahydrofuro[3,2-*c*]pyridine 4i**

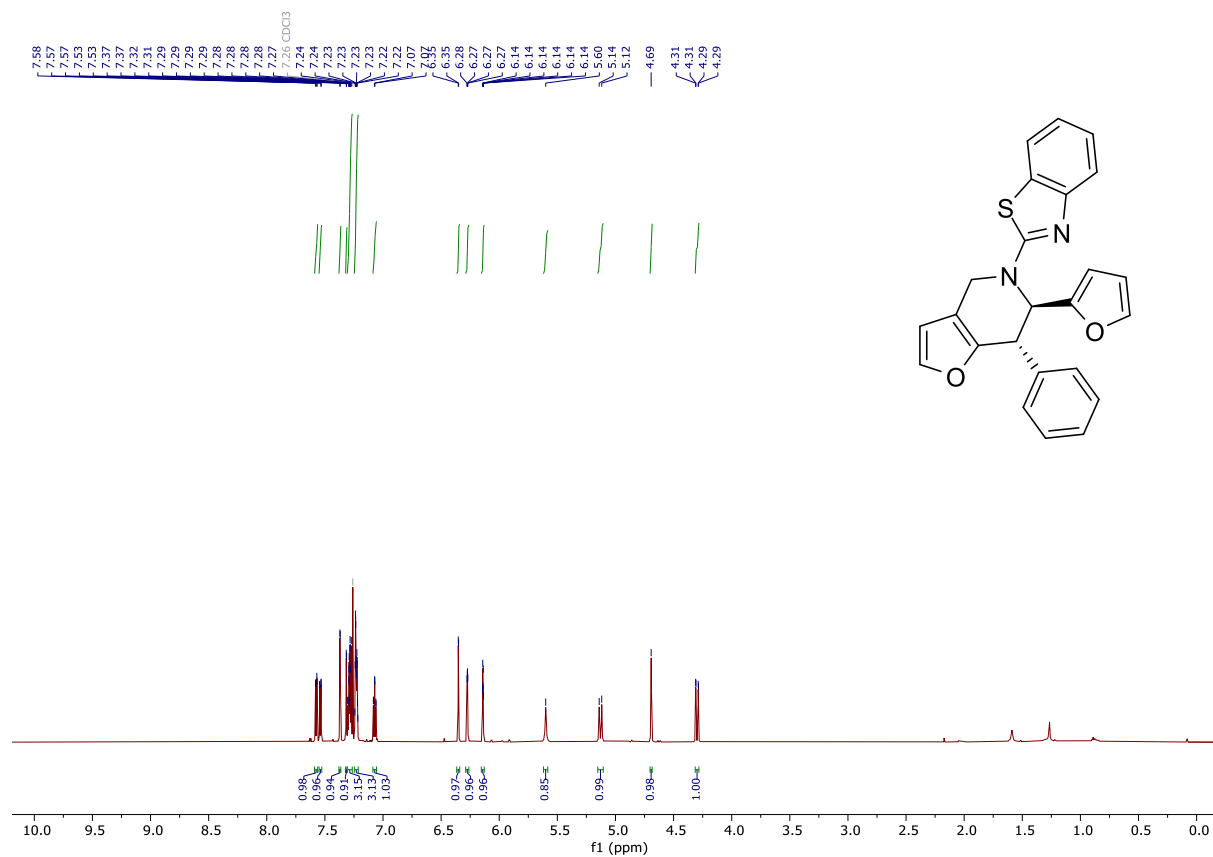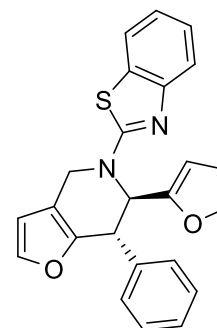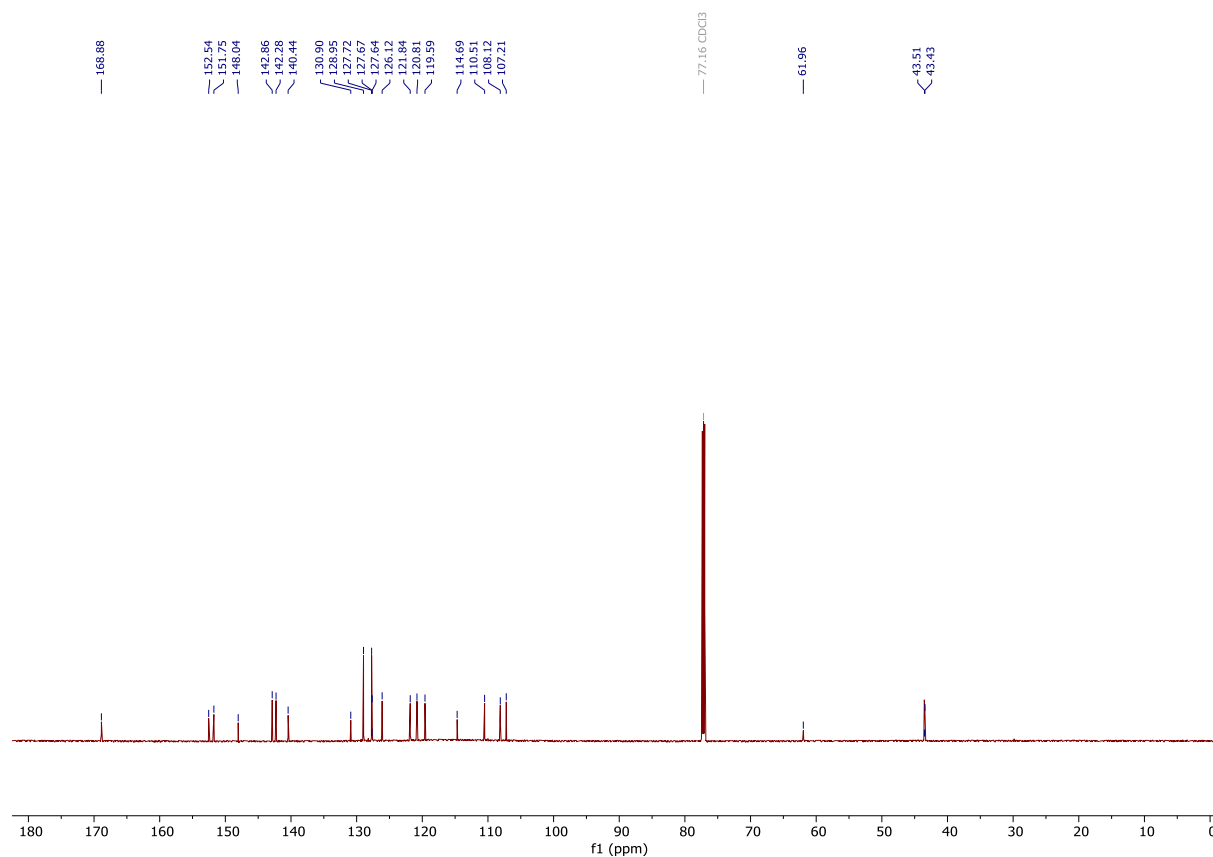

**(6*R*,7*S*)-5-(6-Fluorobenzo[*d*]thiazol-2-yl)-6,7-diphenyl-4,5,6,7-tetrahydrofuro[3,2-*c*]pyridine 4j**

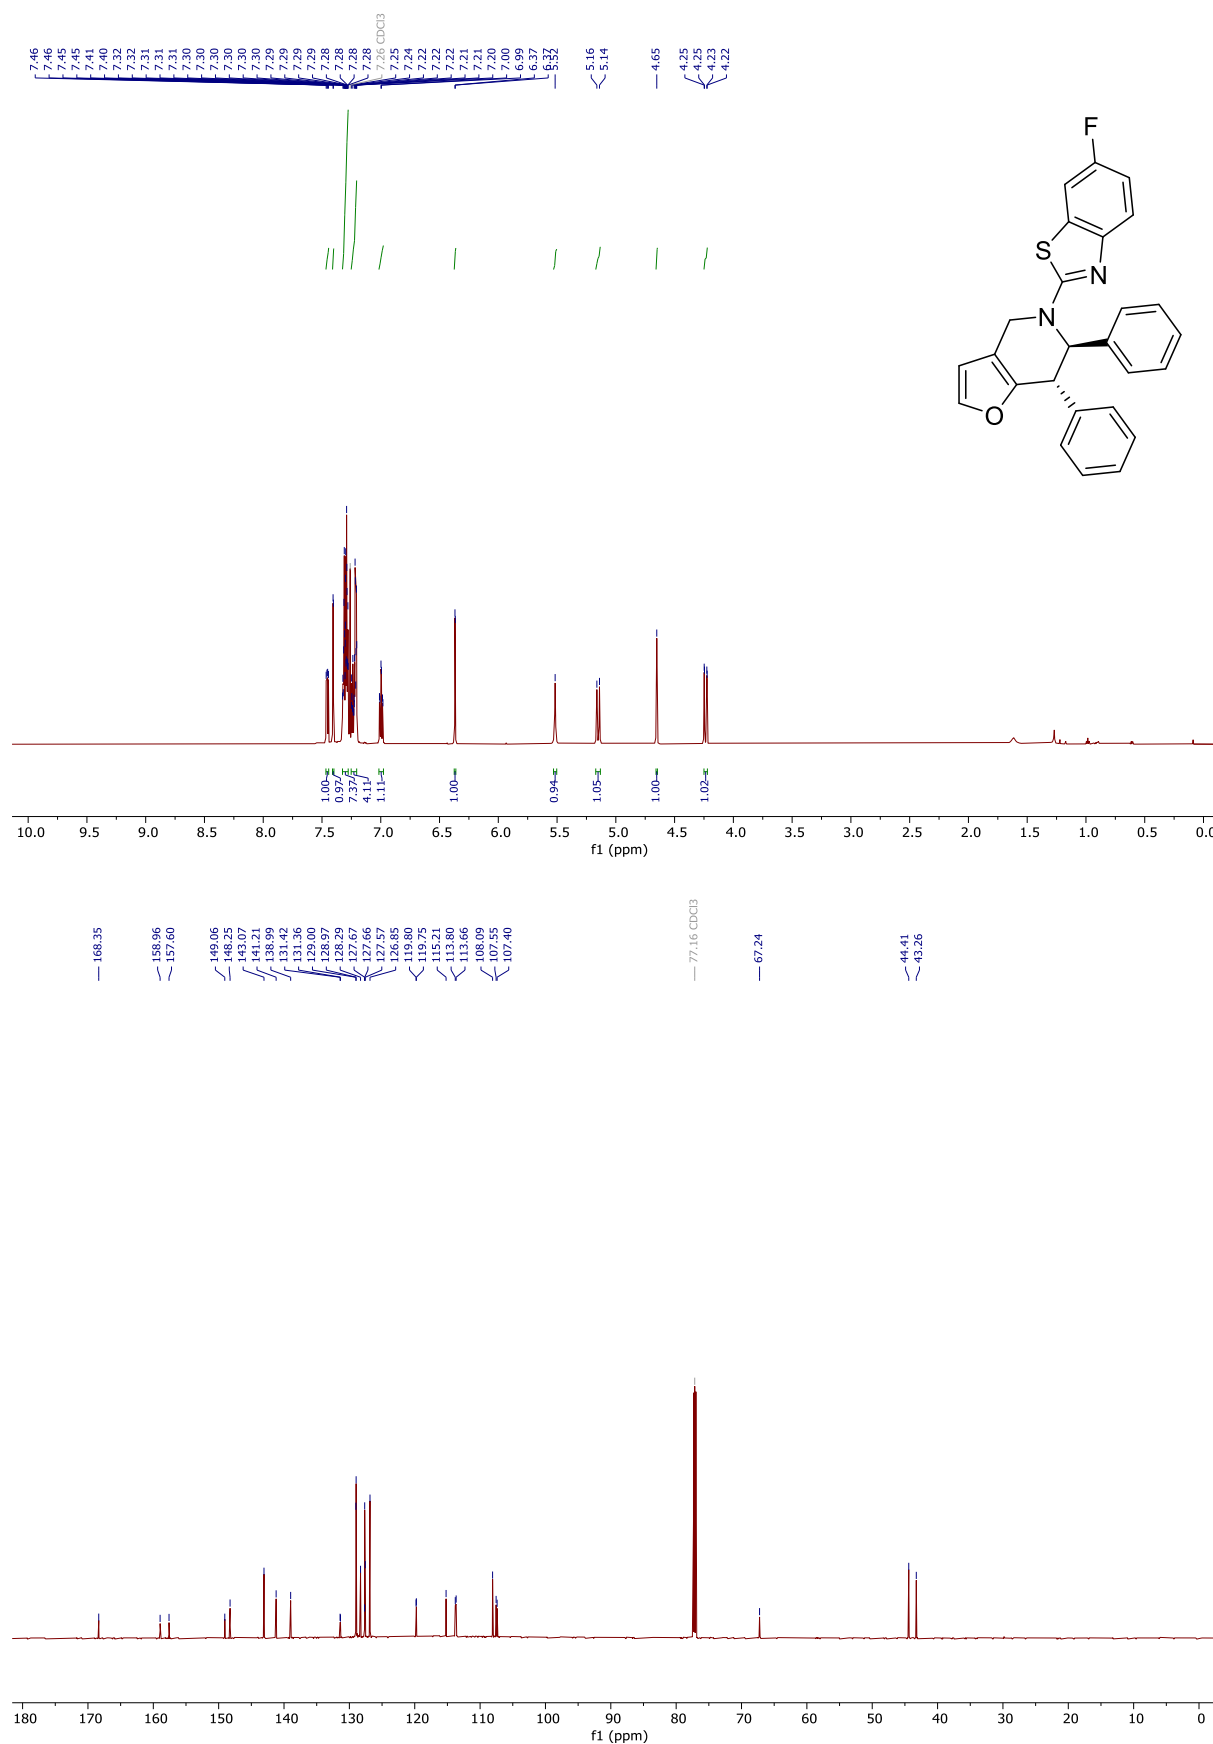

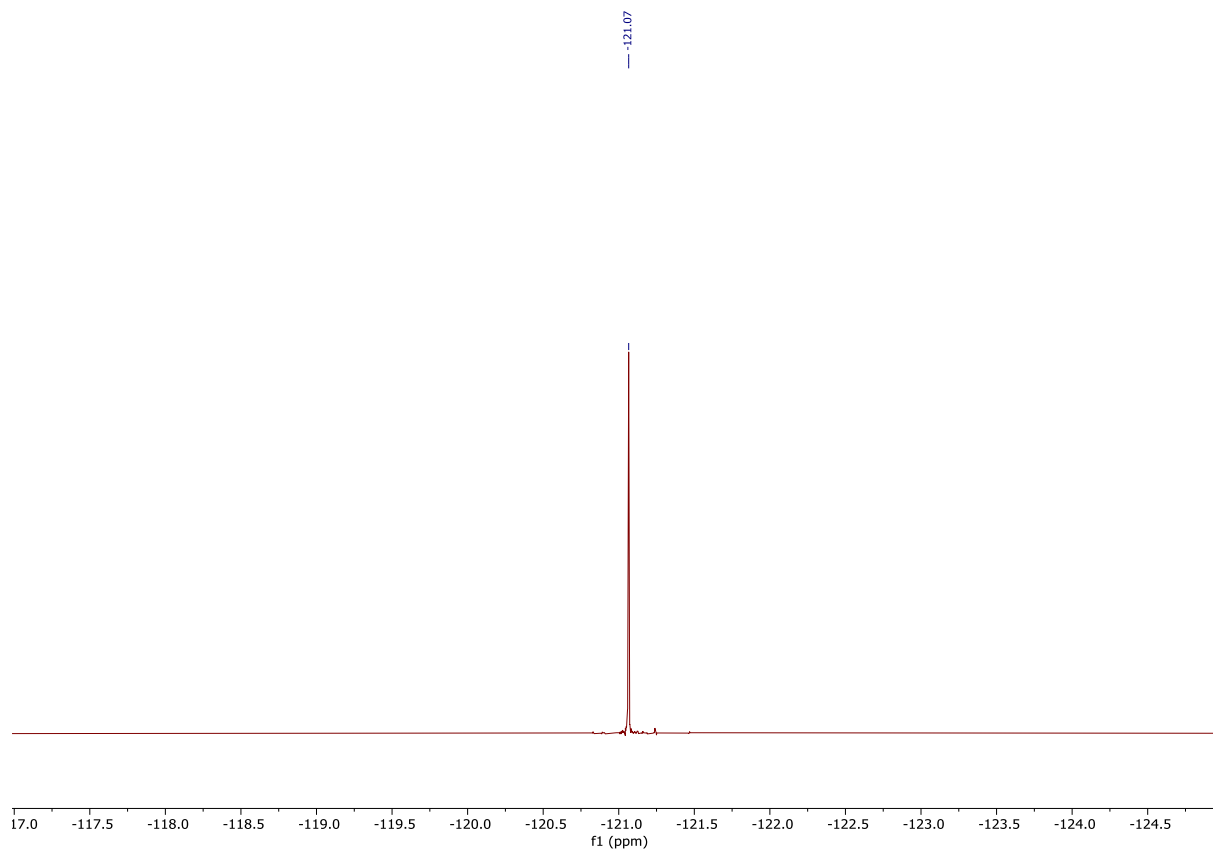





**(E)-Methyl 3-(2-((1S,2R)-2-(benzo[d]thiazol-2-ylamino)-1,2-diphenylethyl)furan-3-yl)acrylate 6**

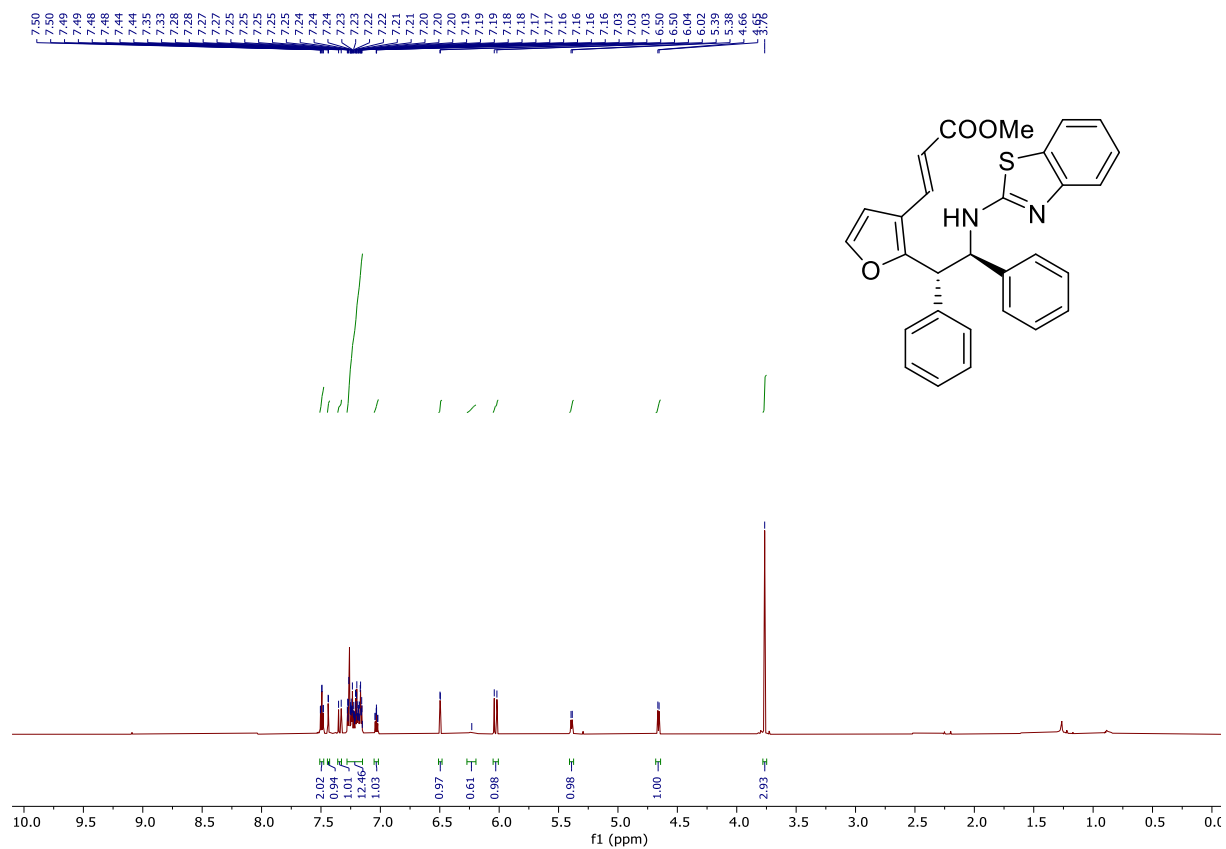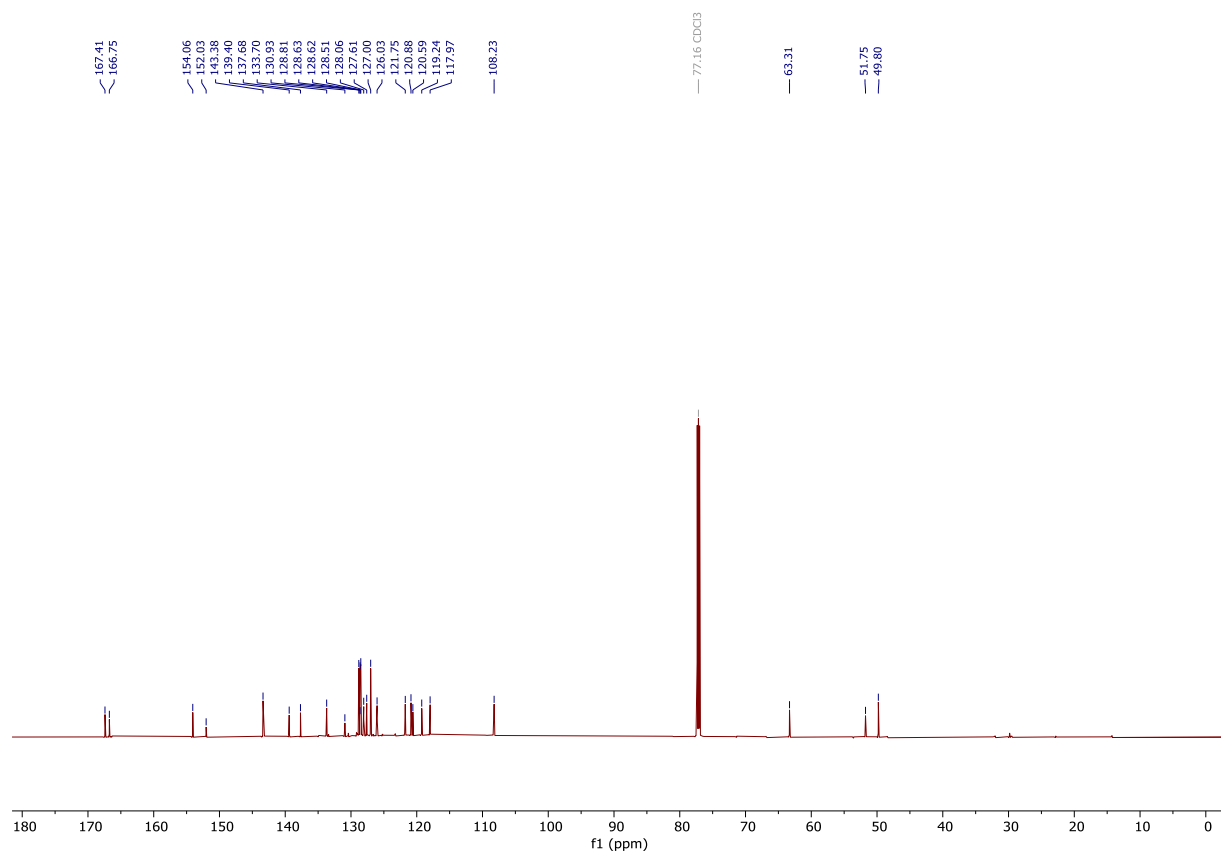

## 8. HPLC traces

### (6*R*,7*S*)-5-(Benzo[*d*]thiazol-2-yl)-6,7-diphenyl-4,5,6,7-tetrahydrofuro[3,2-*c*]pyridine 4a

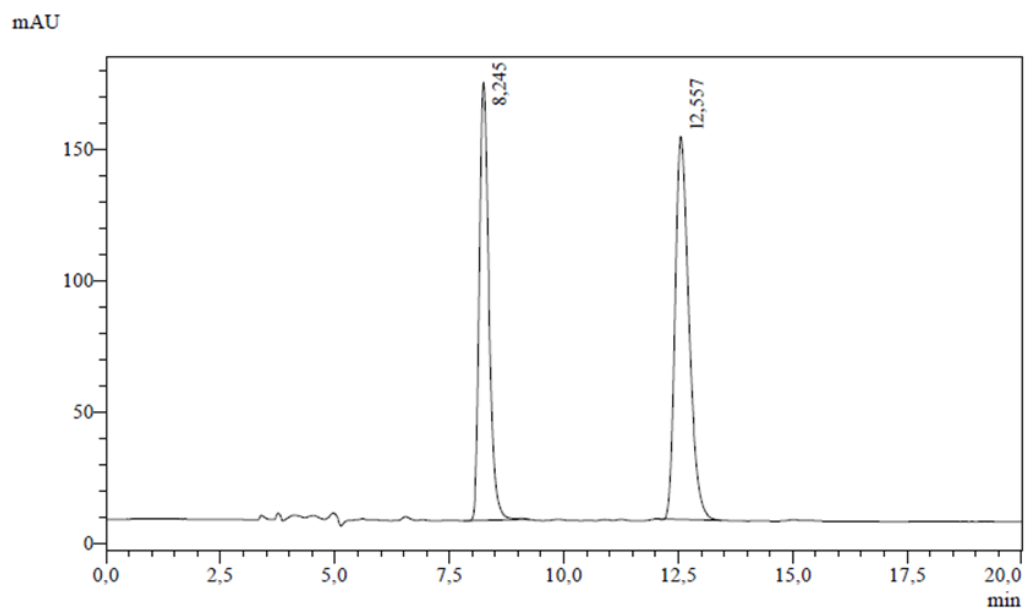

Peak Table

| Peak  | Ret. Time | Area %  |
|-------|-----------|---------|
| 1     | 8.245     | 44.113  |
| 2     | 12.557    | 55.887  |
| Total |           | 100.000 |

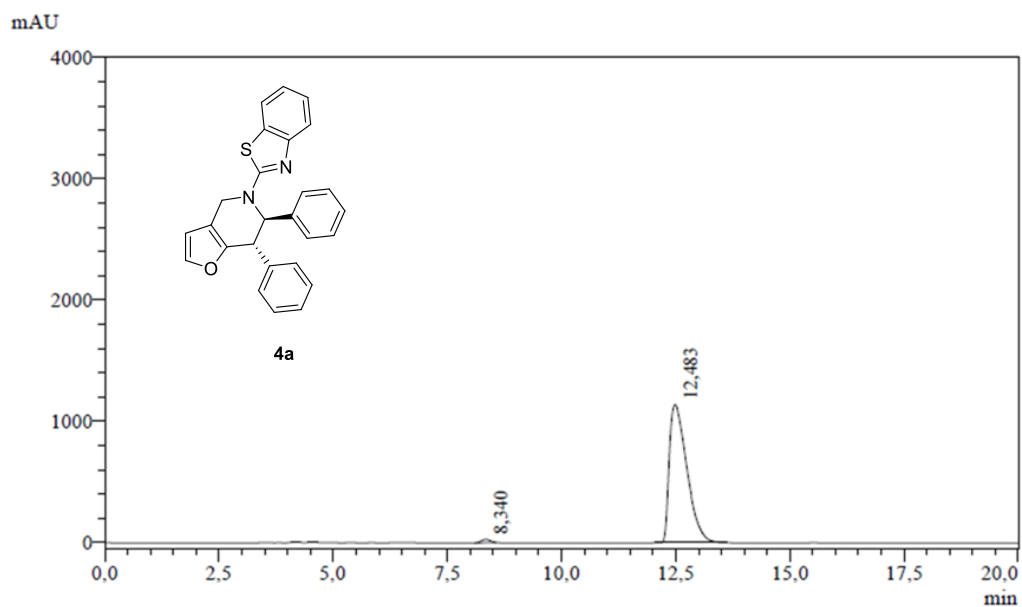

Peak Table

| Peak  | Ret. Time | Area %  |
|-------|-----------|---------|
| 1     | 8.340     | 1.125   |
| 2     | 12.483    | 98.875  |
| Total |           | 100.000 |

**(6*R*,7*S*)-5-(Benzo[*d*]thiazol-2-yl)-6-(3-fluorophenyl)-7-phenyl-4,5,6,7-tetrahydrofuro[3,2-*c*]pyridine 4b**

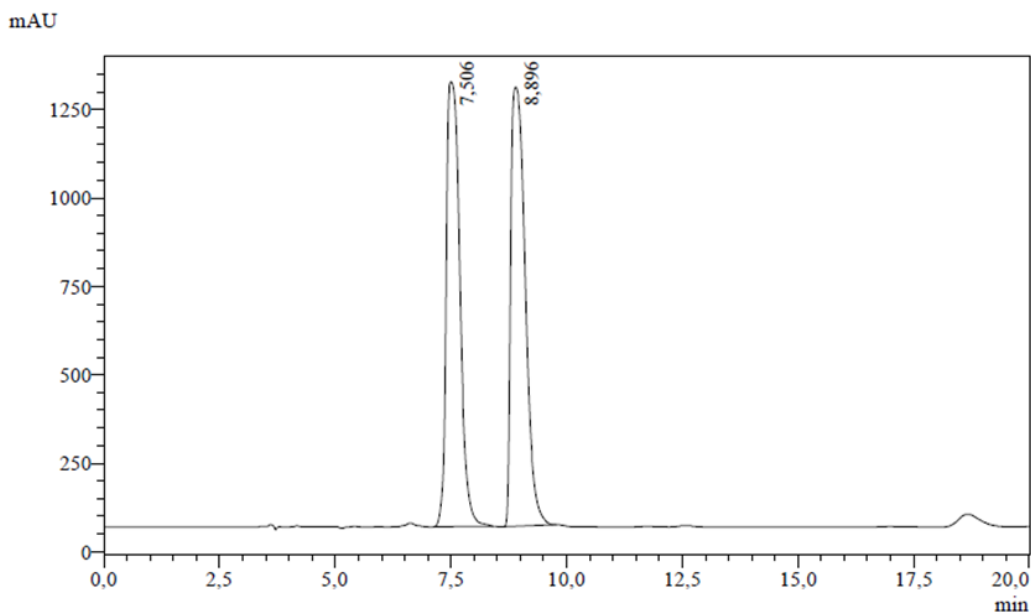

Peak Table

| Peak  | Ret. Time | Area %  |
|-------|-----------|---------|
| 1     | 7.506     | 49.022  |
| 2     | 8.896     | 50.978  |
| Total |           | 100,000 |

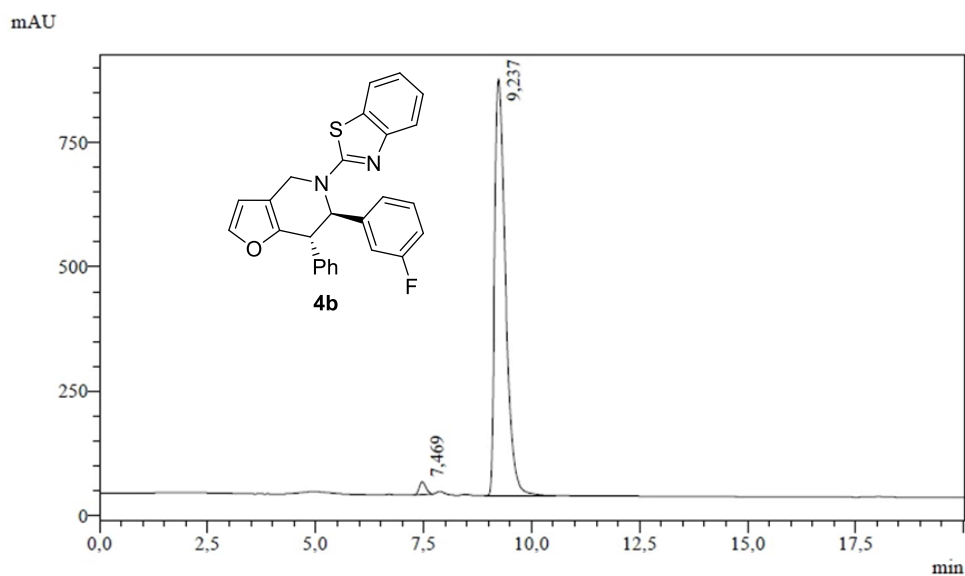

Peak Table

| Peak  | Ret. Time | Area %  |
|-------|-----------|---------|
| 1     | 7.469     | 1.824   |
| 2     | 9.237     | 98.176  |
| Total |           | 100,000 |

**(6*R*,7*S*)-5-(Benzo[*d*]thiazol-2-yl)-6-(4-bromophenyl)-7-phenyl-4,5,6,7-tetrahydrofuro[3,2-*c*]pyridine 4c**

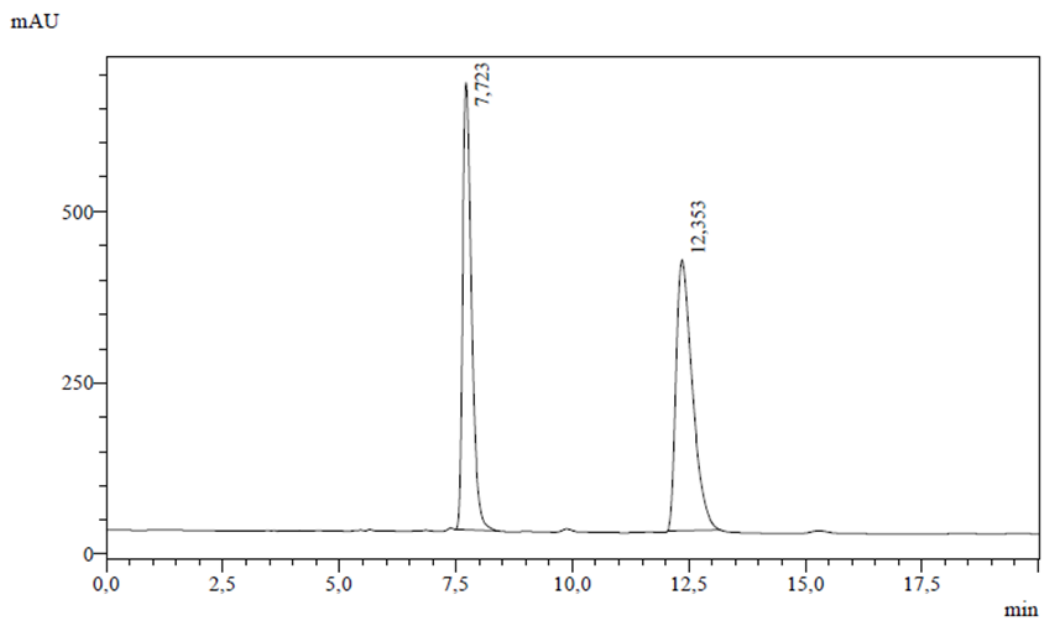

Peak Table

| Peak  | Ret. Time | Area %  |
|-------|-----------|---------|
| 1     | 7.723     | 47.172  |
| 2     | 12.353    | 52.828  |
| Total |           | 100.000 |

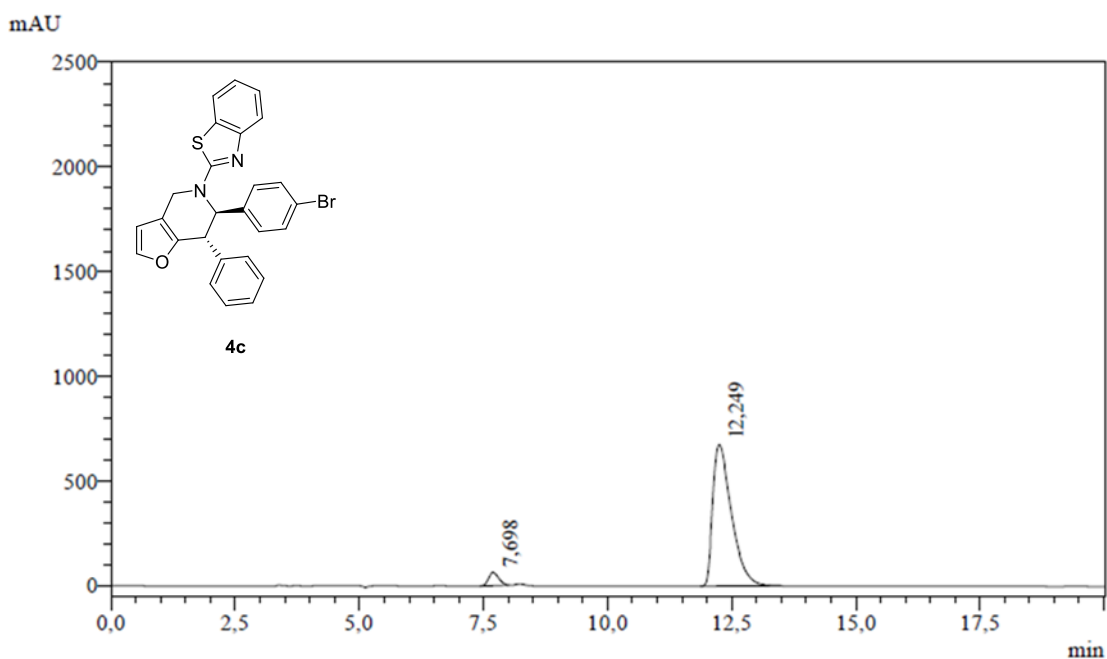

Peak Table

| Peak  | Ret. Time | Area %  |
|-------|-----------|---------|
| 1     | 7.698     | 4.820   |
| 2     | 12.249    | 95.180  |
| Total |           | 100.000 |

**(6*R*,7*S*)-5-(Benzo[*d*]thiazol-2-yl)-6-(2,4-dichlorophenyl)-7-phenyl-4,5,6,7-tetrahydrofuro[3,2-*c*]pyridine 4d**

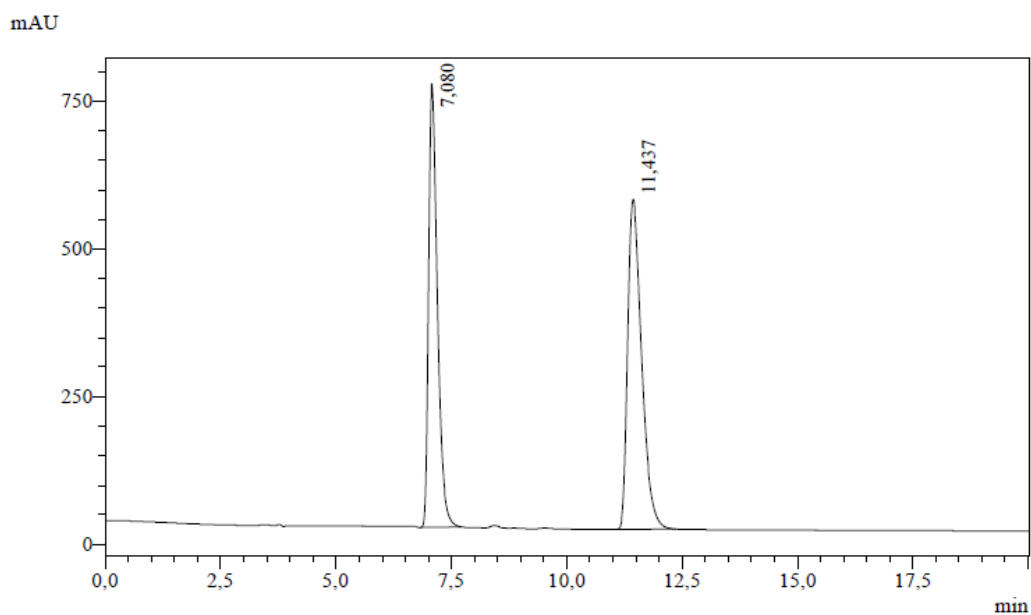

Peak Table

| Peak  | Ret. Time | Area %  |
|-------|-----------|---------|
| 1     | 7.080     | 46,242  |
| 2     | 11.437    | 53,758  |
| Total |           | 100,000 |

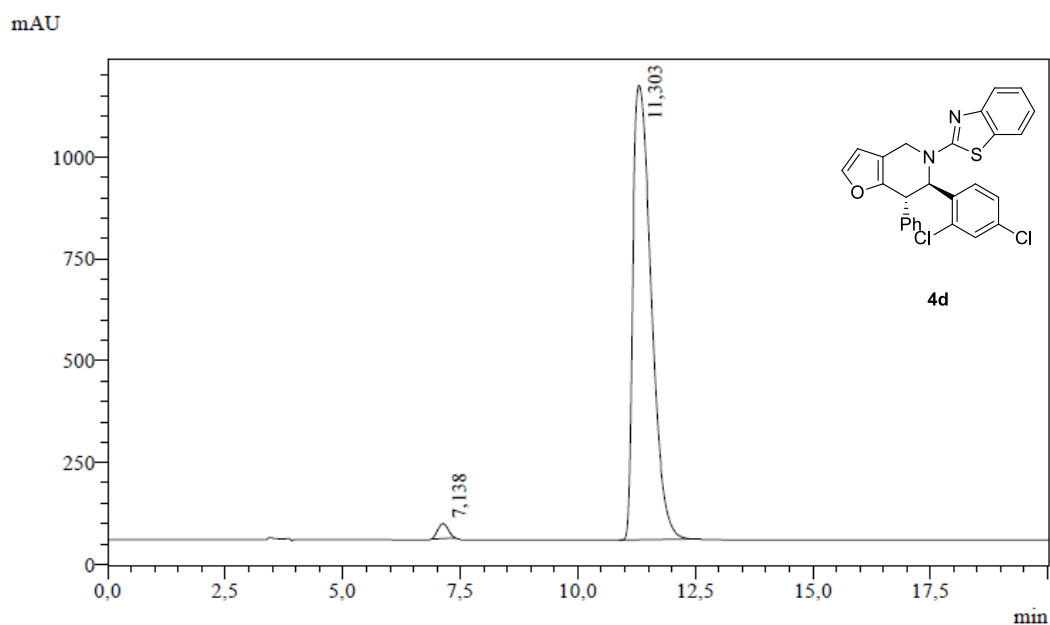

Peak Table

PDA Ch2 269nm

| Peak  | Ret. Time | Area %  |
|-------|-----------|---------|
| 1     | 7.138     | 1,828   |
| 2     | 11.303    | 98,172  |
| Total |           | 100,000 |

**(6*R*,7*S*)-5-(Benzo[*d*]thiazol-2-yl)-6-(4-nitrophenyl)-7-phenyl-4,5,6,7-tetrahydrofuro[3,2-*c*]pyridine 4e**

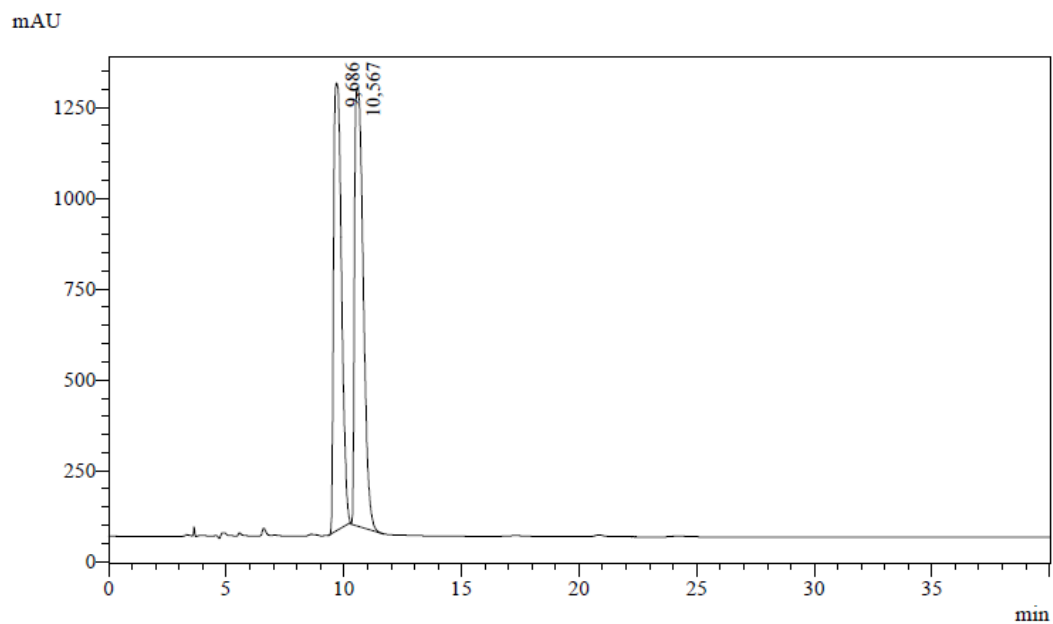

Peak Table

PDA Ch2 268nm

| Peak  | Ret. Time | Area %  |
|-------|-----------|---------|
| 1     | 9.686     | 48.122  |
| 2     | 10.567    | 51.878  |
| Total |           | 100.000 |

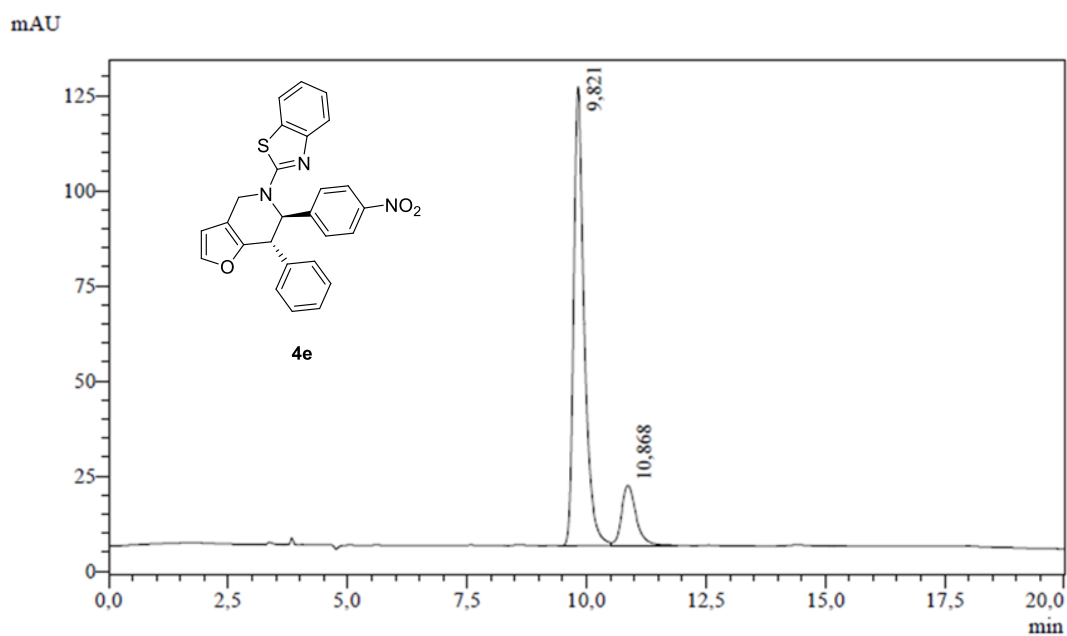

Peak Table

| Peak  | Ret. Time | Area %  |
|-------|-----------|---------|
| 1     | 9.821     | 84.906  |
| 2     | 10.868    | 15.094  |
| Total |           | 100.000 |

**(6*R*,7*S*)-5-(Benzo[*d*]thiazol-2-yl)-6-(3-methoxyphenyl)-7-phenyl-4,5,6,7-tetrahydrofuro[3,2-*c*]pyridine 4f**

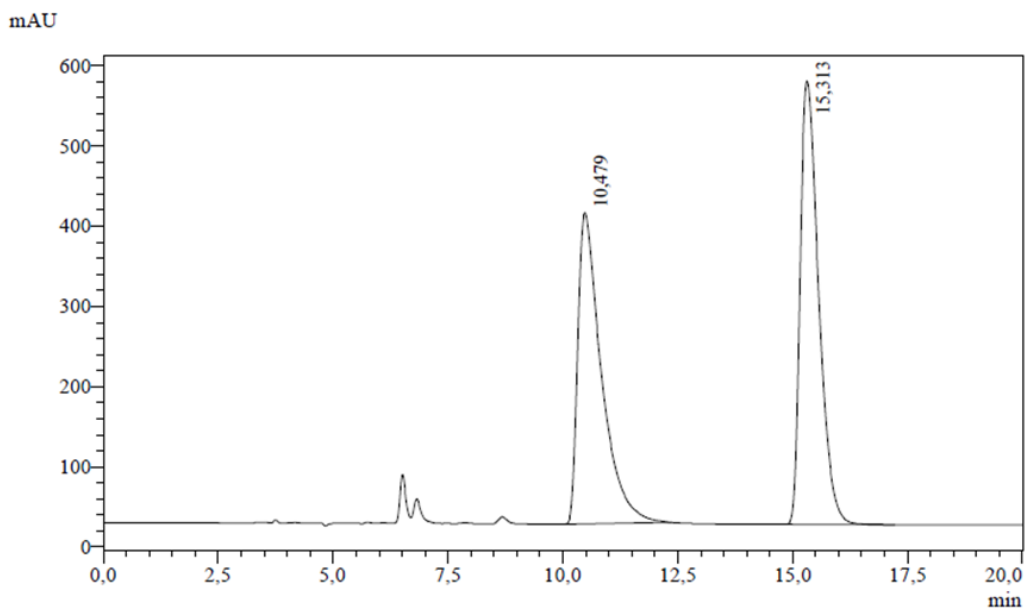

Peak Table

| Peak  | Ret. Time | Area %  |
|-------|-----------|---------|
| 1     | 10.479    | 47.287  |
| 2     | 15.313    | 52.713  |
| Total |           | 100.000 |

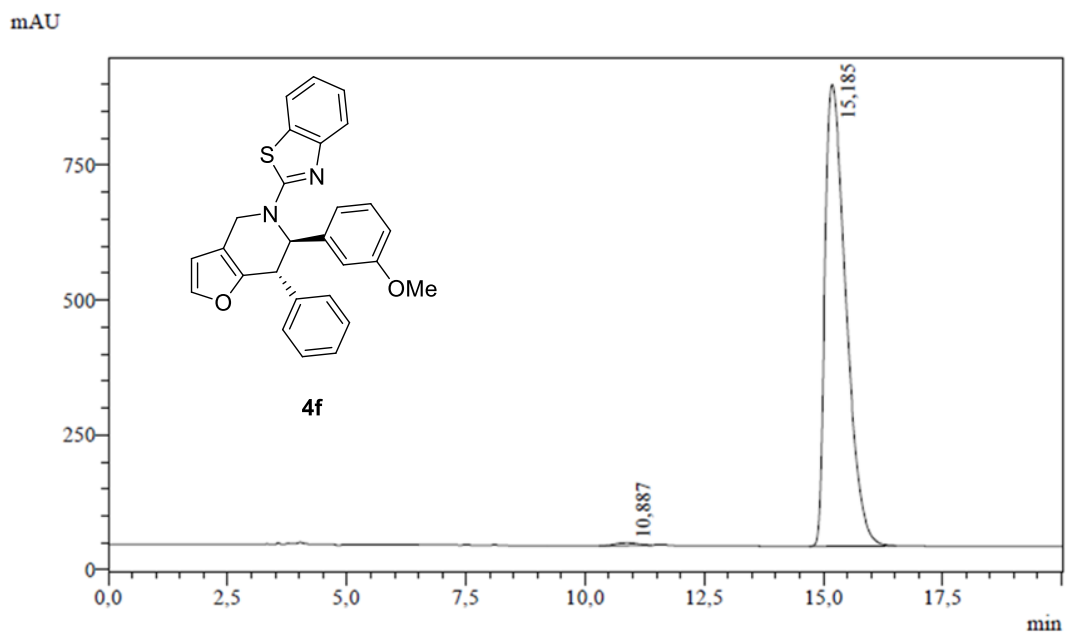

Peak Table

| Peak  | Ret. Time | Area %  |
|-------|-----------|---------|
| 1     | 10.887    | 0.559   |
| 2     | 15.185    | 99.441  |
| Total |           | 100.000 |



**(6*R*,7*S*)-5-(Benzo[*d*]thiazol-2-yl)-6-(2-methoxyphenyl)-7-phenyl-4,5,6,7-tetrahydrofuro[3,2-*c*]pyridine 4g**

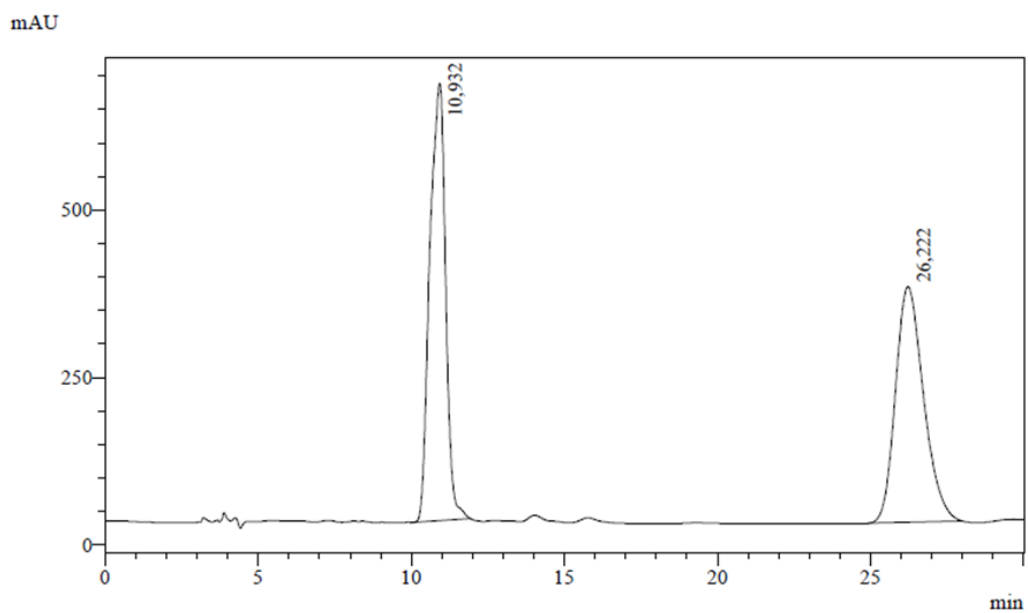

Peak Table

| Peak  | Ret. Time | Area %  |
|-------|-----------|---------|
| 1     | 10.932    | 50.994  |
| 2     | 26.222    | 49.006  |
| Total |           | 100.000 |

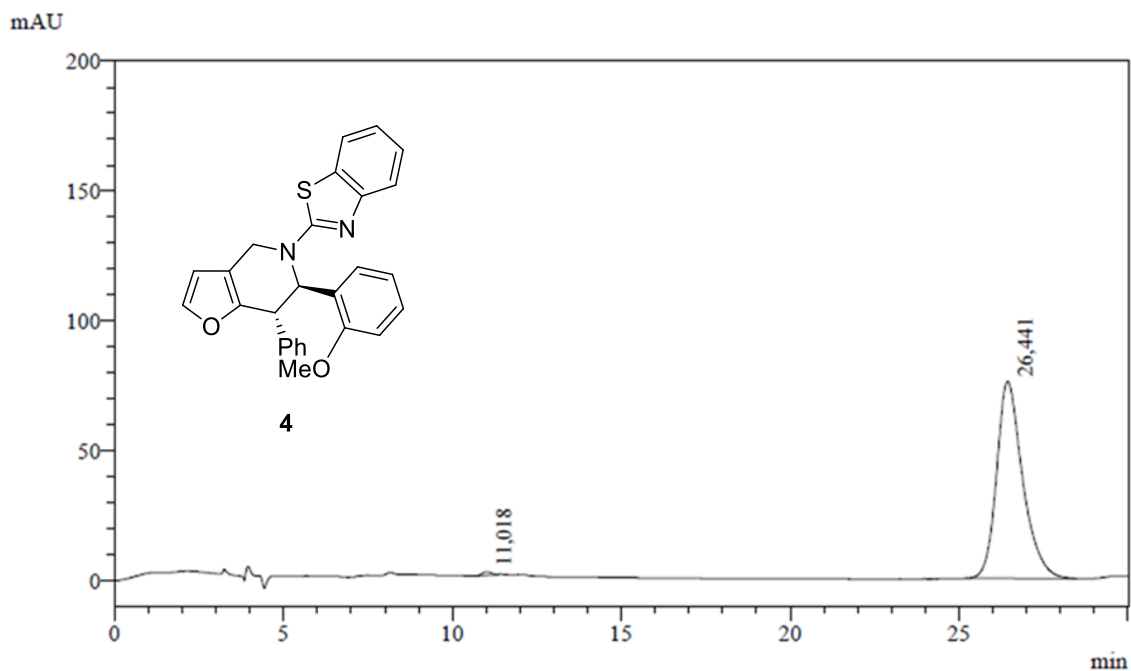

Peak Table

| Peak  | Ret. Time | Area %  |
|-------|-----------|---------|
| 1     | 11.018    | 0.604   |
| 2     | 26.441    | 99.396  |
| Total |           | 100.000 |

**(6*R*,7*S*)-5-(Benzo[*d*]thiazol-2-yl)-6-(naphthalen-2-yl)-7-phenyl-4,5,6,7-tetrahydrofuro[3,2-*c*]pyridine 4h**

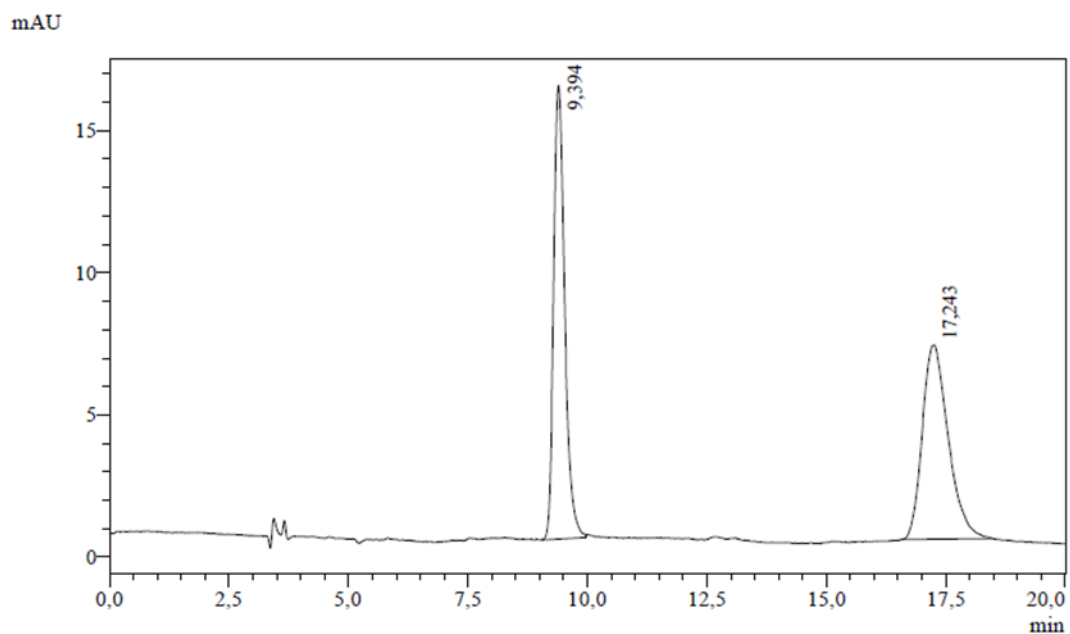

Peak Table

| Peak  | Ret. Time | Area %  |
|-------|-----------|---------|
| 1     | 9.394     | 49.628  |
| 2     | 17.243    | 50.372  |
| Total |           | 100.000 |

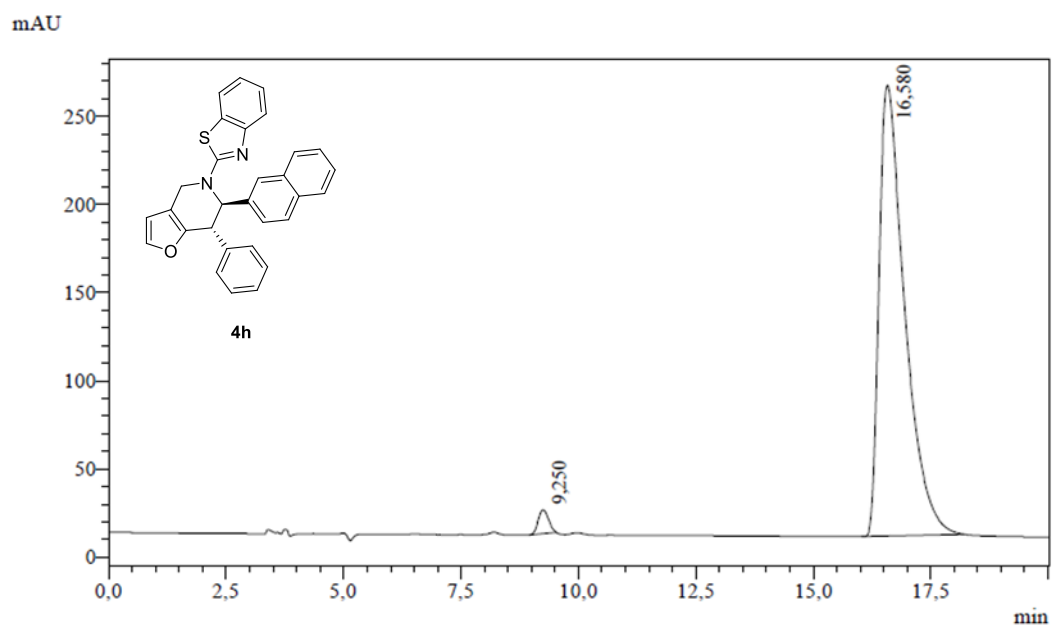

Peak Table

| Peak  | Ret. Time | Area %  |
|-------|-----------|---------|
| 1     | 9.250     | 2.056   |
| 2     | 16.580    | 97.944  |
| Total |           | 100.000 |

**(6*R*,7*S*)-5-(Benzo[*d*]thiazol-2-yl)-6-(furan-2-yl)-7-phenyl-4,5,6,7-tetrahydrofuro[3,2-*c*]pyridine 4i**

mAU

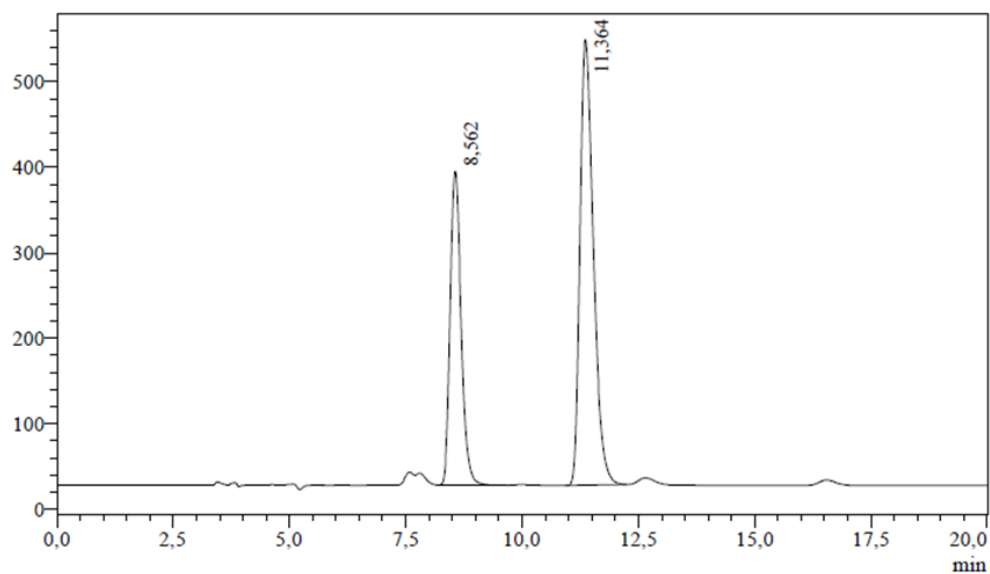

Peak Table

| Peak  | Ret. Time | Area %  |
|-------|-----------|---------|
| 1     | 8.562     | 36.306  |
| 2     | 11.364    | 63.694  |
| Total |           | 100.000 |

mAU

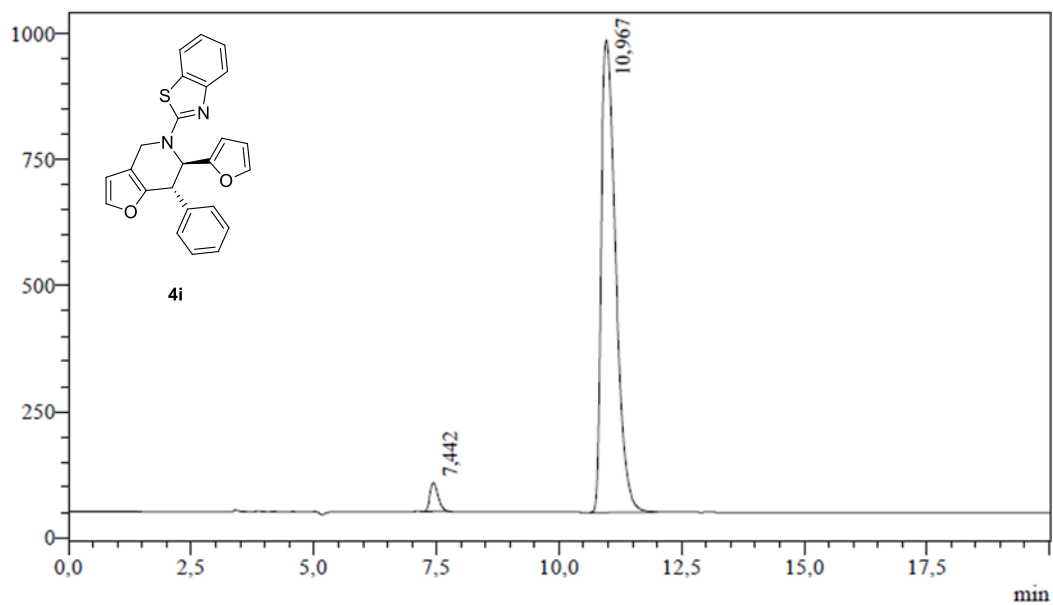

Peak Table

| Peak  | Ret. Time | Area %  |
|-------|-----------|---------|
| 1     | 7.442     | 3.267   |
| 2     | 10.967    | 96.733  |
| Total |           | 100.000 |

**(6*R*,7*S*)-5-(6-Fluorobenzo[*d*]thiazol-2-yl)-6,7-diphenyl-4,5,6,7-tetrahydrofuro[3,2-*c*]pyridine 4j**

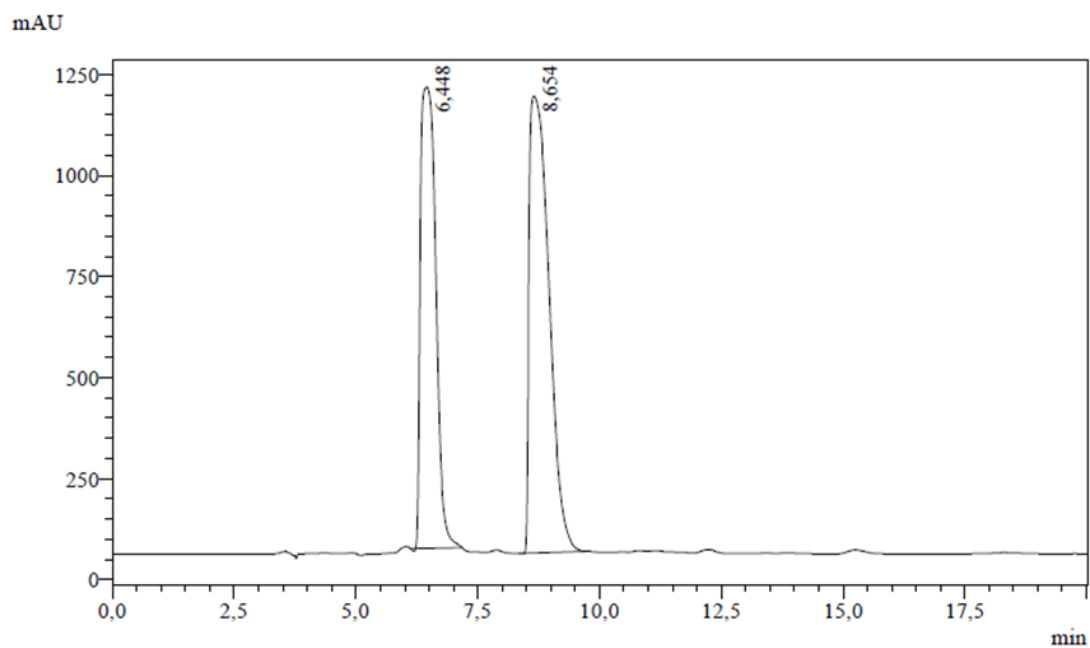

Peak Table

| Peak  | Ret. Time | Area %  |
|-------|-----------|---------|
| 1     | 6.448     | 43.813  |
| 2     | 8.654     | 56.187  |
| Total |           | 100.000 |

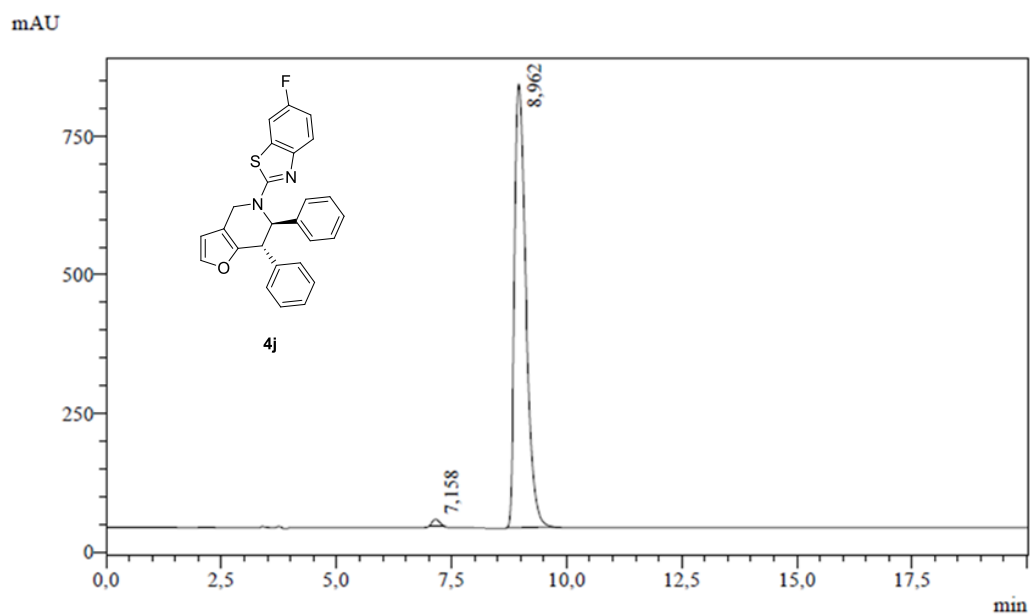

Peak Table

| Peak  | Ret. Time | Area %  |
|-------|-----------|---------|
| 1     | 7.158     | 1.019   |
| 2     | 8.962     | 98.981  |
| Total |           | 100.000 |

**(6*R*,7*S*)-5-(Benzo[*d*]thiazol-2-yl)-7-(3-methoxyphenyl)-6-phenyl-4,5,6,7-tetrahydrofuro[3,2-*c*]pyridine 4k**

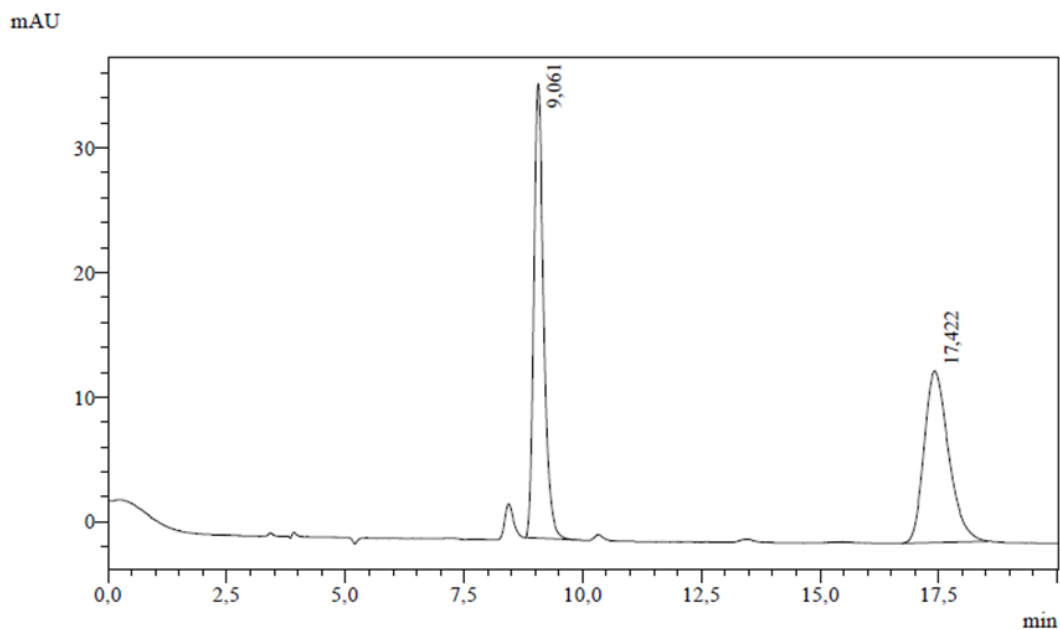

Peak Table

| Peak  | Ret. Time | Area %  |
|-------|-----------|---------|
| 1     | 9.061     | 51.380  |
| 2     | 17.422    | 48.620  |
| Total |           | 100.000 |

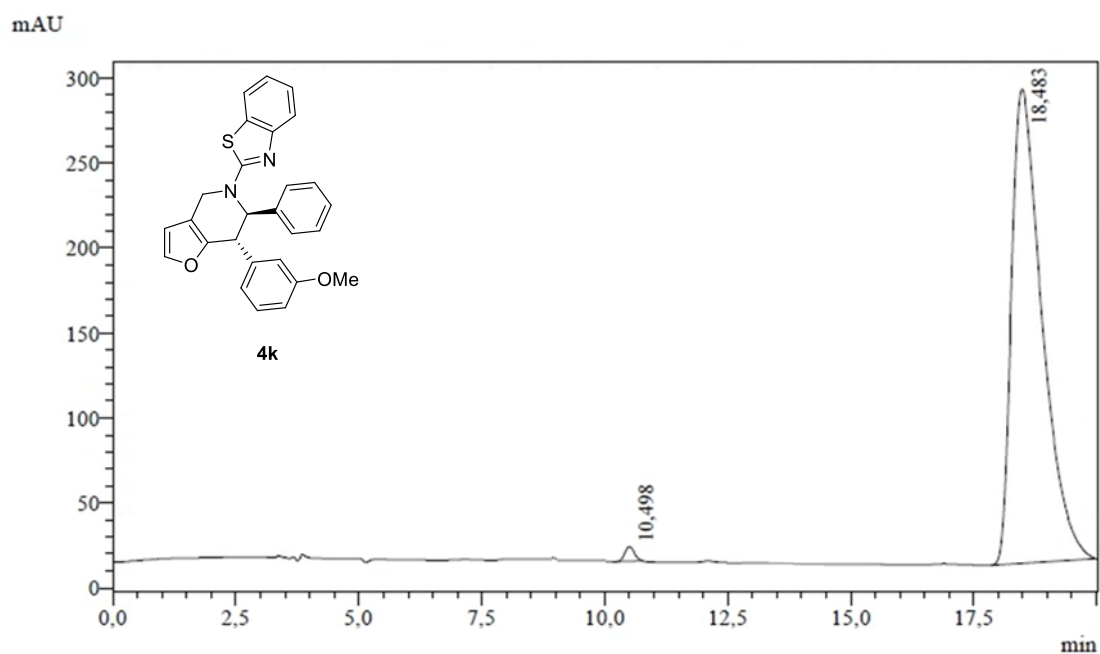

Peak Table

| Peak  | Ret. Time | Area %  |
|-------|-----------|---------|
| 1     | 10.498    | 0.960   |
| 2     | 18.483    | 99.040  |
| Total |           | 100.000 |

**(E)-Methyl 3-(2-((1*S*,2*R*)-2-(benzo[*d*]thiazol-2-ylamino)-1,2-diphenylethyl)furan-3-yl)acrylate 6**

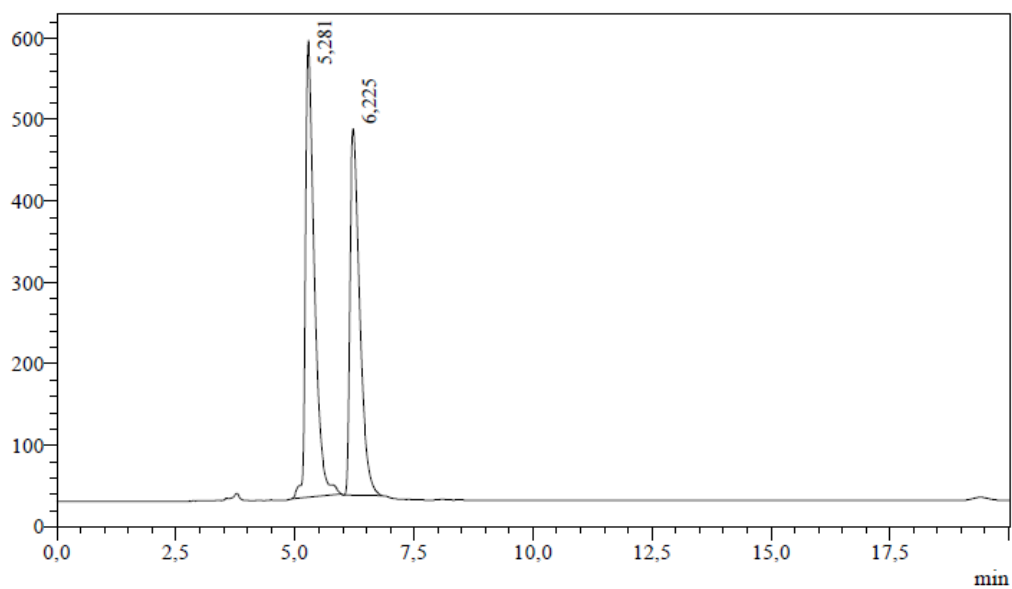

| Peak  | Ret. Time | Area %  |
|-------|-----------|---------|
| 1     | 5,281     | 53,758  |
| 2     | 6,225     | 46,242  |
| Total |           | 100,000 |

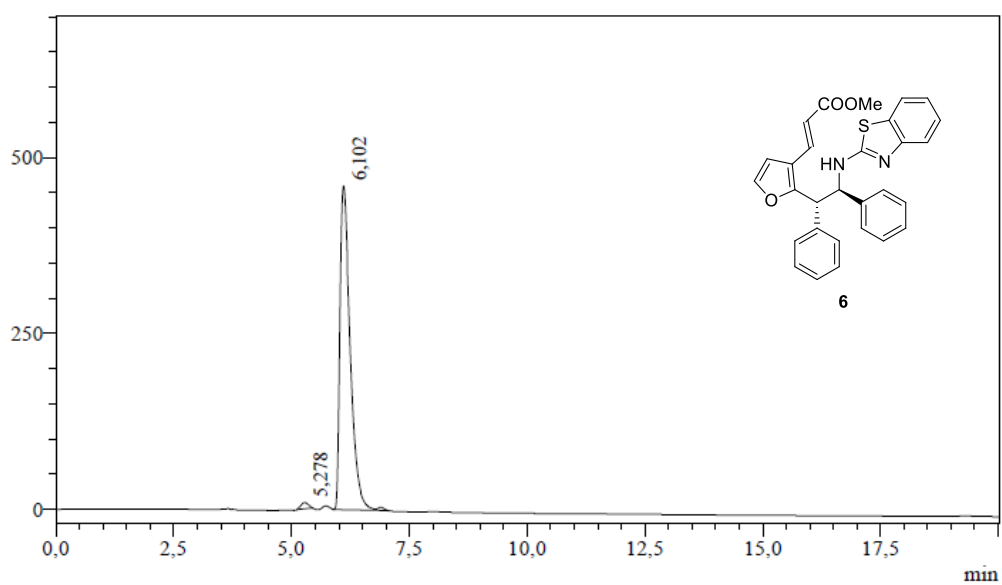

| Peak  | Ret. Time | Area %  |
|-------|-----------|---------|
| 1     | 5,278     | 1,427   |
| 2     | 6,102     | 98,573  |
| Total |           | 100,000 |
